# Supplementary material for: Pd(ii)-catalyzed intermolecular enantioselective hydroamination of styrenes
Source: Royal Society of Chemistry journal article supplement (doi:10.1039/c5qo00096c), 2015-01-01
Supplement: c5qo00096c1.pdf [file c5qo00096c1.pdf]

## Supporting Information

for

# **Pd-Catalyzed Intermolecular Enantioselective Hydroamination of Styenes Coupled with Alcohol Oxidation**

Feng Yu, Pinhong Chen\* and Guosheng Liu\*

State Key Laboratory of Organometallics Chemistry, Shanghai Institute of Organic Chemistry,  
Chinese Academy of Science, 345 Lingling Road, Shanghai, China, 200032.

Email: [Pinhongchen@mail.sioc.ac.cn](mailto:Pinhongchen@mail.sioc.ac.cn); [gliu@mail.sioc.ac.cn](mailto:gliu@mail.sioc.ac.cn)

## **Table of Contents**

|                                                                                       |     |
|---------------------------------------------------------------------------------------|-----|
| 1. General.....                                                                       | S1  |
| 2. Synthesis of chiral pyridine-oxazoline ligands .....                               | S1  |
| 3. General Procedure for Pd-catalyzed hydroamination of styrenes.....                 | S8  |
| 4. New compounds characterization .....                                               | S11 |
| 5. X-Ray structure of enantiopure <b>2a</b> and ( <b>L12</b> )PdCl <sub>2</sub> ..... | S16 |
| 6. Reference .....                                                                    | S20 |
| 7. NMR spectra of ligands and products.....                                           | S21 |
| 8. HPLC of products .....                                                             | S84 |

## 1. General

All reactions were run under N<sub>2</sub> in oven-dried Schlenk tubes. Palladium acetate was purchased from Strem Chemical. Other commercial reagents with high purity were purchased and used without further purification, unless otherwise noted. Reactions were monitored by thin-layer chromatography (TLC) carried out on 25 mm silica gel plates using UV light as a visualizing agent. <sup>1</sup>H and <sup>13</sup>C spectra were recorded on a Varian Mercury-400 MHz or an Agilent-400 MHz spectrometer. CDCl<sub>3</sub> was purchased from J&K. The chemical shifts (δ) are given in parts per million relative to internal standard TMS (0 ppm for <sup>1</sup>H), CDCl<sub>3</sub> (77.0 ppm for <sup>13</sup>C). High performance liquid chromatography was performed on Waters 2487-600E Series HPLC using DAICEL Chiralpak AD-H chiral column eluted with a mixture of hexane and isopropyl alcohol. Optical rotation was measured on a Rudolph-Autopol I. Flash column chromatography was performed on silica gel 60 (particle size 200-400 mesh ASTM, purchased from Yantai, China) and eluted with petroleum ether/ethyl acetate (PE/EA). Ethyl acetate was purified according to the procedure from “Purification of Laboratory Chemicals book”.

## 2. Synthesis of chiral pyridine-oxazoline ligands

Chiral pyridine-oxazoline ligands were synthesized according to the literatures and we take **L12** as an example for the operation in detail.<sup>[S1-3]</sup> Some new ligands with different substituents were characterized as below.

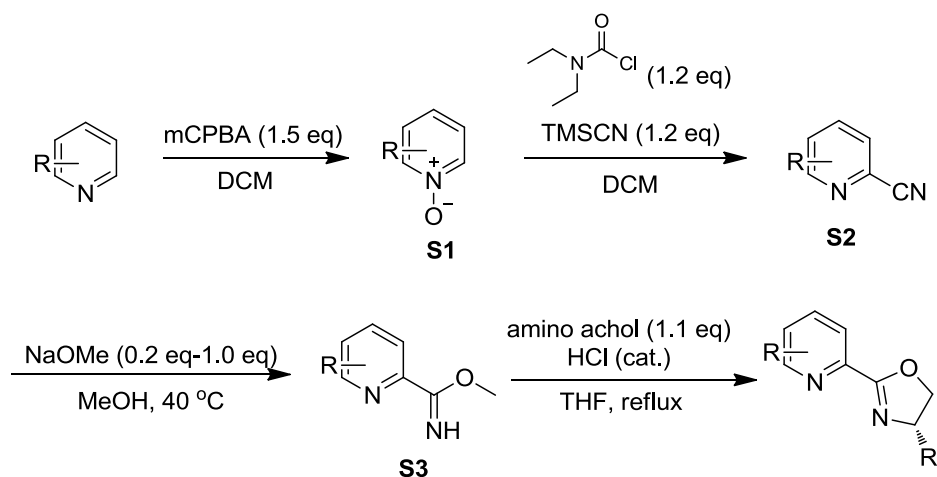

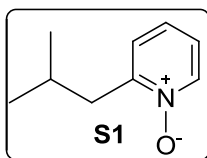

To a stirred solution of 2-isobutylpyridine (5.0 g, 37 mmol) in  $\text{CH}_2\text{Cl}_2$  (120 mL), 85% m-CPBA (11.2 g, 63 mmol, 1.7 equiv) was added portion-wise at 0 °C. The resulting mixture was stirred at room temperature for 12 h. After the reaction was completed, the reaction mixture was diluted with  $\text{CH}_2\text{Cl}_2$ , and solid  $\text{Na}_2\text{CO}_3$  (4.0 equiv) was added. The mixture was stirred for 10 min, and filtered. The filtrate was dried over  $\text{Na}_2\text{SO}_4$  and concentrated under vacuum. The crude residue was purified by silica gel chromatography to afford the pure product **S1** as a white solid (5.0 g, 90% yield).  $^1\text{H}$  NMR (400 MHz,  $\text{CDCl}_3$ )  $\delta$  8.24 (d,  $J$  = 6.4 Hz, 1H), 7.22 – 7.08 (m, 3H), 2.78 (d,  $J$  = 6.8 Hz, 2H), 2.35 – 2.19 (m, 1H), 0.96 (d,  $J$  = 6.8 Hz, 6H);  $^{13}\text{C}$  NMR (100 MHz,  $\text{CDCl}_3$ )  $\delta$  151.7, 139.8, 126.6, 125.4, 123.4, 39.7, 25.3, 22.5; HRMS (ESI) calcd for  $\text{C}_9\text{H}_{13}\text{NO}$   $[\text{M}+\text{H}]^+$ : 152.1075, found: 152.1071.

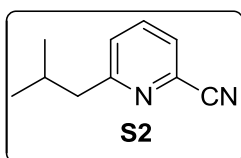

To a solution of **S1** (5.6 g, 37 mmol) in  $\text{CH}_2\text{Cl}_2$  (100 mL) was added trimethylsilyl cyanide (TMSCN, 4.58 g, 46.3 mmol, 1.25 equiv). Then a solution of diethylcarbamide chloride (6.79 g, 46.3 mmol, 1.25 equiv) in  $\text{CH}_2\text{Cl}_2$  (50 mL) was slowly added in 30 min, and the reaction mixture was stirred at room temperature for 24 h. After  $\text{K}_2\text{CO}_3$  (100 mL, 10 % aq.) was added, the mixture was extracted several times with  $\text{CH}_2\text{Cl}_2$ . The combined organic phases was washed with water and then dried over  $\text{MgSO}_4$ . The organic phase was concentrated and purified by silica gel chromatography to afford the product **S2** as a white solid (5.16 g, 87% yield).  $^1\text{H}$  NMR (400 MHz,  $\text{CDCl}_3$ )  $\delta$  7.72 (t,  $J$  = 7.6 Hz, 1H), 7.52 (d,  $J$  = 7.6 Hz, 1H), 7.32 (d,  $J$  = 7.6 Hz, 1H), 2.68 (d,  $J$  = 7.2 Hz, 2H), 2.18 – 2.03 (m, 1H), 0.91 (d,  $J$  = 6.4 Hz, 6H);  $^{13}\text{C}$  NMR (100 MHz,  $\text{CDCl}_3$ )  $\delta$  163.9, 136.9, 133.3, 127.0, 125.9, 117.5, 47.2, 29.1, 22.3; HRMS (ESI) calcd for  $\text{C}_{10}\text{H}_{13}\text{N}_2$   $[\text{M}+\text{H}]^+$ : 161.1073, found: 161.1075.

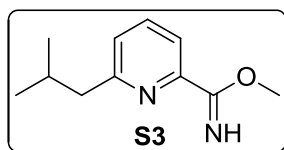

To a stirred solution of **S2** (4.8 g, 30 mmol) in MeOH (50 mL), NaOMe (540 mg, 10 mol) was added portion-wise under N<sub>2</sub>. The mixture was stirred at 40 °C for 12 h. The solvent was removed under vacuum, and the residue was then dissolved in 50 mL of EtOAc and then washed with water and brine. The organic phase was separated and dried over MgSO<sub>4</sub>. After removal of the solvent, the crude product **S3** was used in next step without further purification. Colorless oil, yield: 5.50 g (95%). <sup>1</sup>H NMR (400 MHz, CDCl<sub>3</sub>) δ 9.19 (s, 1H), 7.69 – 7.56 (m, 2H), 7.15 (d, *J* = 6.4 Hz, 1H), 3.98 (s, 3H), 2.66 (d, *J* = 7.2 Hz, 2H), 2.14 (td, *J* = 13.6, 6.4 Hz, 1H), 0.91 (d, *J* = 6.4 Hz, 6H), <sup>13</sup>C NMR (100 MHz, CDCl<sub>3</sub>) δ 167.3, 161.2, 146.6, 137.1, 125.2, 118.0, 53.8, 47.2, 28.9, 22.4; HRMS (ESI) calcd for C<sub>11</sub>H<sub>17</sub>N<sub>2</sub>O [M+H]<sup>+</sup>:193.1335, found: 193.1337.

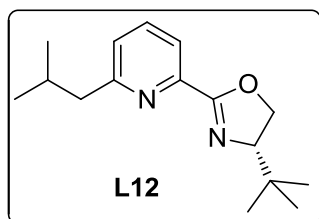

To a mixture of **S3** (1.47 g, 7.7 mmol, 1.0 equiv) and (*S*)-2-amino-1-*tert*-butylethanol (1.1 g, 9.2 mmol, 1.2 equiv) in dry THF (20 mL), HCl (1 drop, 37% aq.) was added, and the mixture was refluxed under argon atmosphere until all the starting materials were consumed with monitored by TLC. After the reaction was complete (12 h), the mixture was diluted with saturated NaHCO<sub>3</sub> (aq., 60 mL) and extracted with EtOAc (3 x 50 mL). After the removal of solvent under reduced pressure, the residue was purified by silica gel chromatography (1:1 hexanes/EtOAc) to afford product **L12** as a white solid (1.45 g 72% yield). [α]<sub>D</sub><sup>27.7</sup> -55.90 (*c* 0.2, MeOH); <sup>1</sup>H NMR (400 MHz, CDCl<sub>3</sub>) δ 7.93 (d, *J* = 7.6 Hz, 1H), 7.62 (t, *J* = 7.6 Hz, 1H), 7.17 (d, *J* = 8.0 Hz, 1H), 4.42 (dd, *J* = 10.4, 8.8 Hz, 1H), 4.28 (t, *J* = 8.4 Hz, 1H), 4.07 (dd, *J* = 10.4, 8.8 Hz, 1H), 2.73 (dd, *J* = 13.6, 7.6 Hz, 1H), 2.69 (dd, *J* = 13.6, 7.6 Hz, 1H), 2.17 – 2.02 (m,

1H), 0.94 (s, 9H), 0.91 (d,  $J = 7.2$  Hz, 3H), 0.89 (d,  $J = 7.2$  Hz, 3H);  $^{13}\text{C}$  NMR (100 MHz,  $\text{CDCl}_3$ )  $\delta$  162.9, 161.7, 146.6, 136.3, 125.20, 121.5, 76.2, 69.4, 47.4, 34.0, 29.0, 25.9, 22.34, 22.30; HRMS (ESI) calcd for  $\text{C}_{16}\text{H}_{25}\text{N}_2\text{O}$   $[\text{M}+\text{H}]^+$ : 261.1961, found: 261.1965.

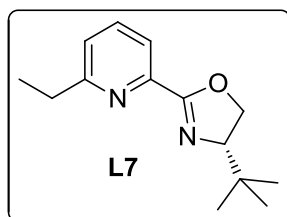

Colorless oil,  $[\alpha]_{\text{D}}^{27.5} -42.16$  ( $c$  0.2, MeOH);  $^1\text{H}$  NMR (400 MHz,  $\text{CDCl}_3$ )  $\delta$  7.95 (d,  $J = 8.0$  Hz, 1H), 7.67 (t,  $J = 7.6$  Hz, 1H), 7.27 (d,  $J = 8.0$  Hz, 1H), 4.45 (dd,  $J = 10.4$ , 8.8 Hz, 1H), 4.31 (t,  $J = 8.8$  Hz, 1H), 4.09 (dd,  $J = 10.4$ , 8.0 Hz, 1H), 2.91 (q,  $J = 7.6$  Hz, 2H), 1.31 (t,  $J = 7.6$  Hz, 3H), 0.96 (s, 9H);  $^{13}\text{C}$  NMR (100 MHz,  $\text{CDCl}_3$ )  $\delta$  163.8, 162.8, 146.4, 136.8, 123.8, 121.5, 76.2, 69.4, 34.0, 31.5, 25.9, 14.2; HRMS (ESI) calcd for  $\text{C}_{14}\text{H}_{21}\text{N}_2\text{O}$   $[\text{M}+\text{H}]^+$ : 233.1648, found: 233.1655.

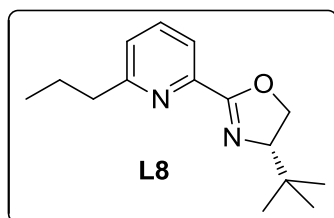

White solid,  $[\alpha]_{\text{D}}^{27.5} -55.49$  ( $c$  0.2, MeOH);  $^1\text{H}$  NMR (400 MHz,  $\text{CDCl}_3$ )  $\delta$  7.95 (d,  $J = 7.8$  Hz, 1H), 7.66 (t,  $J = 7.8$  Hz, 1H), 7.24 (d,  $J = 7.8$  Hz, 1H), 4.45 (dd,  $J = 10.0$ , 8.8 Hz, 1H), 4.31 (t,  $J = 8.4$  Hz, 1H), 4.09 (dd,  $J = 10.0$ , 8.4 Hz, 1H), 2.84 (dd,  $J = 8.8$  Hz, 6.8 Hz, 2H), 1.75 (dq,  $J = 14.8$ , 7.2 Hz, 2H), 0.97 (t,  $J = 7.2$  Hz, 3H), 0.96 (s, 9H);  $^{13}\text{C}$  NMR (100 MHz,  $\text{CDCl}_3$ )  $\delta$  162.8, 162.5, 146.5, 136.6, 124.5, 121.5, 76.2, 69.4, 40.4, 34.0, 25.9, 23.4, 13.9; HRMS (ESI) calcd for  $\text{C}_{15}\text{H}_{23}\text{N}_2\text{O}$   $[\text{M}+\text{H}]^+$ : 247.1805, found: 247.1808.

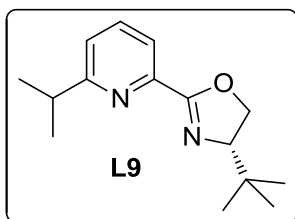

White solid,  $[\alpha]_D^{27.6}$  -55.29 (*c* 0.2, MeOH);  $^1\text{H}$  NMR (400 MHz,  $\text{CDCl}_3$ )  $\delta$  7.95 (d,  $J$  = 7.8 Hz, 1H), 7.69 (t,  $J$  = 7.8 Hz, 1H), 7.29 (d,  $J$  = 7.8 Hz, 1H), 4.45 (dd,  $J$  = 10.4, 8.8 Hz, 1H), 4.31 (t,  $J$  = 8.4 Hz, 1H), 4.09 (dd,  $J$  = 10.4, 8.4 Hz, 1H), 3.27 – 3.14 (m, 1H), 1.30 (d,  $J$  = 6.8 Hz, 6H), 0.96 (s, 9H);  $^{13}\text{C}$  NMR (100 MHz,  $\text{CDCl}_3$ )  $\delta$  167.8, 162.9, 146.1, 136.9, 121.8, 121.7, 76.2, 69.4, 36.6, 34.0, 25.9, 22.9, 22.8; HRMS (ESI) calcd for  $\text{C}_{15}\text{H}_{23}\text{N}_2\text{O}$   $[\text{M}+\text{H}]^+$ : 247.1805, found: 247.1807.

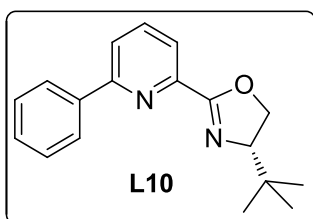

White solid,  $[\alpha]_D^{27.6}$  -33.65 (*c* 0.2, MeOH);  $^1\text{H}$  NMR (400 MHz,  $\text{CDCl}_3$ )  $\delta$  8.16 – 7.99 (m, 3H), 7.88 – 7.76 (m, 2H), 7.55 – 7.35 (m, 3H), 4.48 (dd,  $J$  = 10.4, 8.8 Hz, 1H), 4.35 (t,  $J$  = 8.4 Hz, 1H), 4.14 (dd,  $J$  = 10.4, 8.4 Hz, 1H), 0.99 (s, 9H);  $^{13}\text{C}$  NMR (100 MHz,  $\text{CDCl}_3$ )  $\delta$  162.9, 157.4, 147.0, 138.8, 137.2, 129.2, 128.7, 127.2, 122.5, 122.3, 76.3, 69.4, 34.0, 26.0; HRMS (ESI) calcd for  $\text{C}_{18}\text{H}_{21}\text{N}_2\text{O}$   $[\text{M}+\text{H}]^+$ : 281.1648, found: 281.1649.

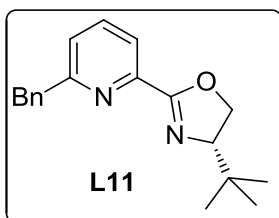

White solid,  $[\alpha]_D^{27.7}$  -30.95 (*c* 0.2, MeOH);  $^1\text{H}$  NMR (400 MHz,  $\text{CDCl}_3$ )  $\delta$  7.95 (d,  $J$  = 7.6 Hz, 1H), 7.61 (t,  $J$  = 7.6 Hz, 1H), 7.36 – 7.17 (m, 5H), 7.08 (d,  $J$  = 7.6 Hz, 1H), 4.46 (t,  $J$  = 9.6 Hz, 1H), 4.33 (t,  $J$  = 8.4 Hz, 1H), 4.27 (s, 2H), 4.11 (dd,  $J$  = 10.4, 8.4 Hz, 1H), 0.97 (s, 9H);  $^{13}\text{C}$  NMR (100 MHz,  $\text{CDCl}_3$ )  $\delta$  162.7, 161.3, 146.4, 139.0,

136.9, 129.3, 128.6, 126.5, 125.0, 121.8, 76.3, 69.4, 44.6, 34.0, 25.9; HRMS (ESI) calcd for  $C_{19}H_{23}N_2O$   $[M+H]^+$ : 295.1805, found: 295.1810.

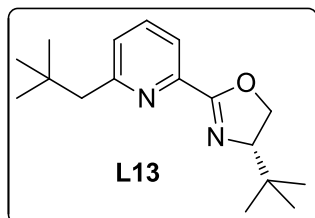

White solid,  $[\alpha]_D^{27.8}$  -55.79 (*c* 0.2, MeOH);  $^1H$  NMR (400 MHz,  $CDCl_3$ )  $\delta$  7.95 (d, *J* = 7.6 Hz, 1H), 7.63 (t, *J* = 7.6 Hz, 1H), 7.19 (d, *J* = 7.6 Hz, 1H), 4.43 (dd, *J* = 10.4, 8.8 Hz, 1H), 4.29 (t, *J* = 8.0 Hz, 1H), 4.07 (dd, *J* = 10.4, 8.0 Hz, 1H), 2.80 (d, *J* = 12.4 Hz, 1H), 2.74 (d, *J* = 12.4 Hz, 1H), 0.95 (s, 9H), 0.94 (s, 9H);  $^{13}C$  NMR (100 MHz,  $CDCl_3$ )  $\delta$  163.1, 160.2, 146.3, 135.8, 126.3, 121.5, 76.1, 69.4, 51.6, 34.0, 32.1, 29.5, 25.9; HRMS (ESI) calcd for  $C_{17}H_{27}N_2O$   $[M+H]^+$ : 275.2118, found: 275.2125.

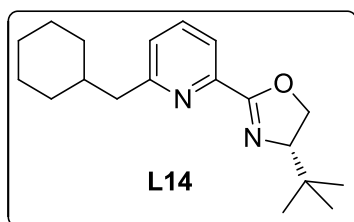

White solid,  $[\alpha]_D^{27.8}$  -33.97 (*c* 0.2, MeOH);  $^1H$  NMR (400 MHz,  $CDCl_3$ )  $\delta$  7.95 (d, *J* = 7.6 Hz, 1H), 7.64 (t, *J* = 7.6 Hz, 1H), 7.18 (d, *J* = 7.6 Hz, 1H), 4.46 (dd, *J* = 10.4, 8.8 Hz, 1H), 4.32 (t, *J* = 8.8 Hz, 1H), 4.09 (dd, *J* = 10.4, 8.4 Hz, 1H), 2.75 (dd, *J* = 12.8, 7.6 Hz, 1H), 2.72 (dd, *J* = 13.2, 7.2 Hz, 1H), 1.82 – 1.72 (m, 1H), 1.71 – 1.59 (m, 5H), 1.25 – 1.11 (m, 3H), 1.05 – 0.94 (m, 2H), 0.97 (s, 9H);  $^{13}C$  NMR (100 MHz,  $CDCl_3$ )  $\delta$  162.9, 161.4, 146.6, 136.1, 125.4, 121.5, 76.2, 69.4, 46.2, 38.3, 34.0, 33.0, 26.5, 26.1, 25.9; HRMS (ESI) calcd for  $C_{19}H_{29}N_2O$   $[M+H]^+$ : 301.2274, found: 301.2278.

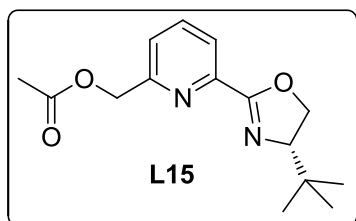

Yellow solid,  $[\alpha]_D^{27.8}$  -33.31 (*c* 0.2, MeOH);  $^1\text{H}$  NMR (400 MHz,  $\text{CDCl}_3$ )  $\delta$  8.06 (d,  $J$  = 7.6 Hz, 1H), 7.79 (t,  $J$  = 7.6 Hz, 1H), 7.45 (d,  $J$  = 7.6 Hz, 1H), 5.28 (s, 2H), 4.45 (dd,  $J$  = 10.4, 8.8 Hz, 1H), 4.31 (t,  $J$  = 8.8 Hz, 1H), 4.11 (dd,  $J$  = 10.4, 8.4 Hz, 1H), 2.16 (s, 3H), 0.96 (s, 9H);  $^{13}\text{C}$  NMR (100 MHz,  $\text{CDCl}_3$ )  $\delta$  170.5, 162.2, 156.0, 146.6, 137.3, 123.4, 123.3, 76.3, 69.4, 66.7, 34.0, 25.9, 20.9; HRMS (ESI) calcd for  $\text{C}_{15}\text{H}_{21}\text{N}_2\text{O}_3$   $[\text{M}+\text{H}]^+$ : 277.1547, found: 277.1548.

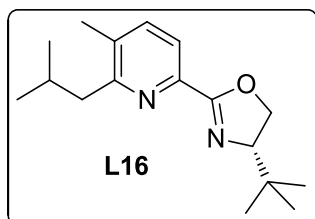

Colorless oil,  $[\alpha]_D^{27.8}$  -47.46 (*c* 0.2, MeOH);  $^1\text{H}$  NMR (400 MHz,  $\text{CDCl}_3$ )  $\delta$  7.83 (d,  $J$  = 8.0 Hz, 1H), 7.44 (d,  $J$  = 8.0 Hz, 1H), 4.41 (dd,  $J$  = 10.4, 8.8 Hz, 1H), 4.28 (t,  $J$  = 8.4 Hz, 1H), 4.05 (dd,  $J$  = 10.4, 8.4 Hz, 1H), 2.72 (d,  $J$  = 7.2 Hz, 2H), 2.33 (s, 3H), 2.14-2.11 (m, 1H), 0.94 (s, 9H), 0.92 (d,  $J$  = 7.2 Hz, 3H), 0.90 (d,  $J$  = 7.2 Hz, 3H);  $^{13}\text{C}$  NMR (100 MHz,  $\text{CDCl}_3$ )  $\delta$  163.1, 160.2, 144.1, 137.8, 133.8, 121.6, 76.1, 69.3, 43.8, 34.0, 28.9, 25.9, 22.4, 19.4; HRMS (ESI) calcd for  $\text{C}_{17}\text{H}_{27}\text{N}_2\text{O}$   $[\text{M}+\text{H}]^+$ : 275.2118, found: 275.2122.

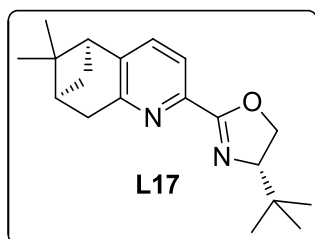

Colorless oil,  $[\alpha]_D^{28.0}$  -133.22 (*c* 0.2,  $\text{CHCl}_3$ );  $^1\text{H}$  NMR (400 MHz,  $\text{CDCl}_3$ )  $\delta$  7.82 (d,  $J$  = 8.0 Hz, 1H), 7.25 (d,  $J$  = 8.0 Hz, 1H), 4.41 (dd,  $J$  = 10.0, 8.8 Hz, 1H), 4.28 (t,  $J$  = 8.4 Hz, 1H), 4.07 (dd,  $J$  = 10.0, 8.4 Hz, 1H), 3.18 (d,  $J$  = 2.8 Hz, 2H), 2.78 (t,  $J$  = 5.6



Hz, 1H), 2.71 – 2.62 (m, 1H), 2.37 – 2.33 (m, 1H), 1.38 (s, 3H), 1.23 (d,  $J = 9.6$  Hz, 1H), 0.94 (s, 9H), 0.61 (s, 3H);  $^{13}\text{C}$  NMR (100 MHz,  $\text{CDCl}_3$ )  $\delta$  162.8, 157.1, 144.5, 144.0, 133.3, 121.2, 76.3, 69.2, 46.6, 40.0, 39.4, 36.6, 34.0, 31.6, 25.9, 21.2; HRMS (ESI) calcd for  $\text{C}_{19}\text{H}_{27}\text{N}_2\text{O}$   $[\text{M}+\text{H}]^+$ : 299.2118, found: 299.2120.

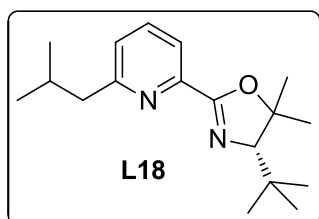

Colorless oil,  $[\alpha]_{\text{D}}^{27.9} -8.80$  ( $c$  0.2, MeOH);  $^1\text{H}$  NMR (400 MHz,  $\text{CDCl}_3$ )  $\delta$  7.6 (d,  $J = 7.8$  Hz, 1H), 7.59 (t,  $J = 7.6$  Hz, 1H), 7.14 (d,  $J = 8.0$  Hz, 1H), 3.59 (s, 1H), 2.73 (dd,  $J = 13.2, 7.6$  Hz, 1H), 2.69 (dd,  $J = 13.2, 7.6$  Hz, 1H), 2.14 – 2.04 (m, 1H), 1.54 (s, 3H), 1.50 (s, 3H), 1.09 (s, 9H), 0.89 (d,  $J = 7.2$  Hz, 3H), 0.87 (d,  $J = 7.2$  Hz, 3H);  $^{13}\text{C}$  NMR (100 MHz,  $\text{CDCl}_3$ )  $\delta$  161.7, 147.4, 136.1, 124.9, 121.3, 88.5, 82.9, 47.3, 34.1, 30.7, 28.9, 27.8, 23.2, 22.4, 22.3; HRMS (ESI) calcd for  $\text{C}_{18}\text{H}_{29}\text{N}_2\text{O}$   $[\text{M}+\text{H}]^+$ : 289.2274, found: 289.2282.

### 3. General Procedure for Pd-catalyzed hydroamination of styrenes.

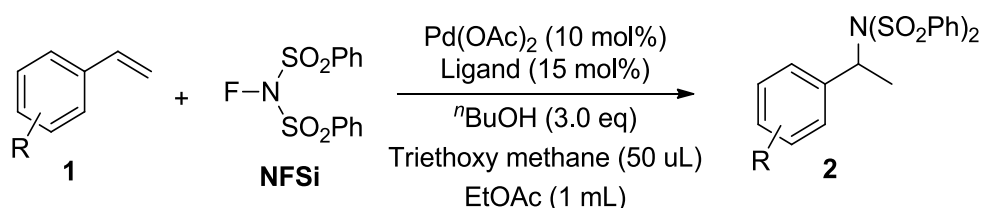

To an oven-dried Schlenk tube,  $\text{Pd}(\text{OAc})_2$  (4.4 mg, 0.01 mmol), ligand L13 (7.8 mg, 0.015 mmol), and NFSi (175 mg, 0.6 mmol) were dissolved in EtOAc (1 mL) under  $\text{N}_2$  atmosphere. Then styrene (0.2 mmol),  $n$ -butyl alcohol (44.5 mg, 0.6 mmol) and triethyl orthoformate (50  $\mu\text{L}$ , 3 mmol) were added subsequently. The resulting mixture was stirred at 30  $^\circ\text{C}$ , and monitored by TLC. After the styrene was consumed, the solvent was removed and the residue was purified by silica gel chromatography to

give the product (See Table 1).

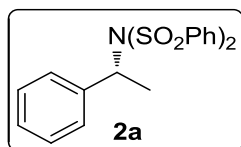

White solid;  $^1\text{H}$  NMR (400 MHz,  $\text{CDCl}_3$ )  $\delta$  7.71 (bs, 4H), 7.56 (t,  $J = 7.6$  Hz, 2H), 7.46 – 7.40 (m, 6H), 7.30 – 7.27 (m, 3H), 5.63 (q,  $J = 7.6$  Hz, 1H), 1.65 (d,  $J = 7.6$  Hz, 3H);  $^{13}\text{C}$  NMR (100MHz,  $\text{CDCl}_3$ )  $\delta$  140.4, 137.3, 133.5, 128.8, 128.7, 128.2, 128.1, 128.0, 60.3, 18.0; IR  $\text{cm}^{-1}$ : 1449, 1349, 1170, 1083, 959, 878, 757, 583; HRMS (ESI) calcd for  $\text{C}_{10}\text{H}_{19}\text{NO}_4\text{S}_2\text{Na}$   $[\text{M}+\text{Na}]^+$ : 424.0648, found: 424.0648; HPLC (DAICEL Chiralpak AD-H, hexane/ isopropanol = 9/1, flow 0.7 mL/min, detection at 214 nm) retention time = 14.0 min (minor) and 19.8 min (major).

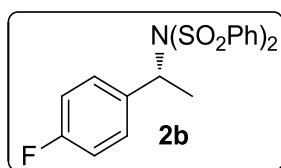

White solid;  $^1\text{H}$  NMR (400 MHz,  $\text{CDCl}_3$ )  $\delta$  7.75 (bs, 4H), 7.60 (t,  $J = 7.2$  Hz, 2H), 7.48-7.41 (m, 6H), 6.96 (t,  $J = 8.8$  Hz, 2H), 5.59 (q,  $J = 7.2$  Hz, 1H), 1.64 (d,  $J = 7.2$  Hz, 3H);  $^{13}\text{C}$  NMR (100 MHz,  $\text{CDCl}_3$ )  $\delta$  163.4 (d,  $J = 246.2$  Hz), 140.4, 133.6, 133.3 (d,  $J = 3.8$  Hz), 130.6 (d,  $J = 8.2$  Hz), 128.8, 128.1, 114.9 (d,  $J = 21.6$  Hz), 59.7, 18.2; HRMS (EI) calcd for  $\text{C}_{19}\text{H}_{15}\text{FNO}_4\text{S}_2$   $[\text{M}-\text{CH}_3]$ : 404.0427, found: 404.0422; HPLC (DAICEL Chiralpak AD-H, hexane/ isopropanol = 9/1, flow 0.7 mL/min, detection at 214 nm) retention time = 12.9 min (minor) and 16.5 min (major).

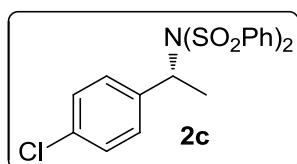

White solid;  $^1\text{H}$  NMR (400 MHz,  $\text{CDCl}_3$ )  $\delta$  7.75 (bs, 4H), 7.60 (t,  $J = 7.6$  Hz, 2H), 7.5 (t,  $J = 7.6$  Hz, 4H), 7.4 (d,  $J = 8.4$  Hz, 2H), 7.2 (d,  $J = 8.4$  Hz, 2H), 5.58 (q,  $J = 7.2$  Hz,

1H), 1.63 (d,  $J = 7.2$  Hz, 3H);  $^{13}\text{C}$  NMR (100 MHz,  $\text{CDCl}_3$ )  $\delta$  140.3, 136.0, 134.0, 133.6, 130.2, 128.8, 128.3, 128.1, 59.5, 18.0; HRMS (EI) calcd for  $\text{C}_{19}\text{H}_{15}\text{ClINO}_4\text{S}_2$  [M-CH<sub>3</sub>]: 420.0131, found: 420.0130; HPLC (DAICEL Chiralpak AD-H, hexane/isopropanol = 7/3, flow 0.7 mL/min, detection at 214 nm) retention time = 7.4 min (minor) and 9.9 min (major).

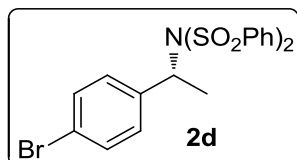

White solid;  $^1\text{H}$  NMR (400 MHz,  $\text{CDCl}_3$ )  $\delta$  7.61 (bs, 4H), 7.46 (t,  $J = 7.6$  Hz, 2H), 7.32 (t,  $J = 7.6$  Hz, 4H), 7.24 (d,  $J = 8.8$  Hz, 2H), 7.15 (d,  $J = 8.8$  Hz, 2H), 5.56 (q,  $J = 7.2$  Hz, 1H), 1.62 (d,  $J = 7.2$  Hz, 3H);  $^{13}\text{C}$  NMR (100 MHz,  $\text{CDCl}_3$ )  $\delta$  140.3, 136.5, 133.6, 131.1, 130.5, 128.8, 128.1, 122.1, 59.6, 17.9; HRMS (EI) calcd for  $\text{C}_{20}\text{H}_{18}\text{BrNO}_4\text{S}_2$  [M]: 478.9861, found: 478.9868; HPLC (DAICEL Chiralpak AD-H, hexane/ isopropanol = 8/2, flow 0.7 mL/min, detection at 214 nm) retention time = 9.5 min (minor) and 14.2 min (major).

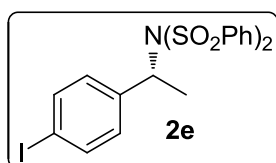

White solid;  $^1\text{H}$  NMR (400 MHz,  $\text{CDCl}_3$ )  $\delta$  7.72 (bs, 4H), 7.60 – 7.55 (m, 4H), 7.44 (t,  $J = 7.6$  Hz, 4H), 7.14 (d,  $J = 8.2$  Hz, 2H), 5.54 (q,  $J = 7.2$  Hz, 1H), 1.60 (d,  $J = 7.2$  Hz, 3H);  $^{13}\text{C}$  NMR (100 MHz,  $\text{CDCl}_3$ )  $\delta$  140.3, 137.2, 137.1, 133.7, 130.7, 128.9, 128.1, 93.9, 59.7, 17.9; HRMS (ESI) calcd for  $\text{C}_{20}\text{H}_{22}\text{IN}_2\text{O}_4\text{S}_2$  [M+NH<sub>4</sub>]<sup>+</sup>: 545.0060, found: 545.0066; HPLC (DAICEL Chiralpak AD-H, hexane/ isopropanol = 7/3, flow 0.7 mL/min, detection at 214 nm) retention time = 8.1 min (minor) and 11.3 min (major).

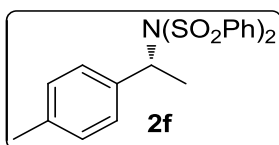

White solid;  $^1\text{H}$  NMR (400 MHz,  $\text{CDCl}_3$ )  $\delta$  7.73 (bs, 4H), 7.57 (t,  $J = 7.2$  Hz, 2H), 7.43 (t,  $J = 7.6$  Hz, 4H), 7.32 (d,  $J = 8.0$  Hz, 2H), 7.07 (d,  $J = 8.0$  Hz, 2H), 5.61 (q,  $J = 7.2$  Hz, 1H), 2.36 (s, 3H), 1.65 (d,  $J = 7.2$  Hz, 3H);  $^{13}\text{C}$  NMR (100 MHz,  $\text{CDCl}_3$ )  $\delta$  140.6, 137.8, 134.4, 133.4, 128.8, 128.7, 128.5, 128.2, 60.3, 21.1, 18.1; HRMS (ESI) calcd for  $\text{C}_{20}\text{H}_{21}\text{NO}_4\text{S}_2\text{Na}$   $[\text{M}+\text{Na}]^+$ : 438.0804, found: 438.0803; HPLC (DAICEL Chiralpak AD-H, hexane/ isopropanol = 9/1, flow 0.7 mL/min, detection at 214 nm) retention time = 12.4 min (minor) and 21.1 min (major).

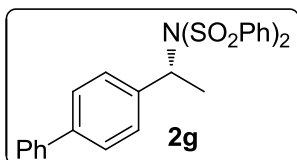

White solid;  $^1\text{H}$  NMR (400 MHz,  $\text{CDCl}_3$ )  $\delta$  7.78 (s, 4H), 7.66 – 7.54 (m, 4H), 7.54 – 7.35 (m, 11H), 5.72 (q,  $J = 7.2$  Hz, 1H), 1.72 (d,  $J = 7.2$  Hz, 3H);  $^{13}\text{C}$  NMR (100 MHz,  $\text{CDCl}_3$ )  $\delta$  140.9, 140.5, 136.4, 133.5, 129.3, 128.9, 128.8, 128.2, 127.6, 127.1, 126.7, 60.2, 18.2; HRMS (ESI) calcd for  $\text{C}_{26}\text{H}_{27}\text{N}_2\text{O}_4\text{S}_2$   $[\text{M}+\text{NH}_4]^+$ : 495.1407, found: 495.1408; HPLC (DAICEL Chiralpak AD-H, hexane/ isopropanol = 7/3, flow 0.7 mL/min, detection at 214 nm) retention time = 8.3 min (minor) and 10.1 min (major).

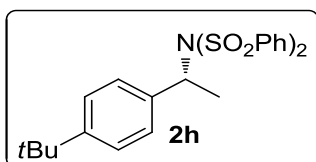

Colorless oil;  $^1\text{H}$  NMR (400 MHz,  $\text{CDCl}_3$ )  $\delta$  7.68 (bs, 4H), 7.56 (t,  $J = 11.2$  Hz, 2H), 7.43 – 7.38 (m, 6H), 7.31 (d,  $J = 8.4$  Hz, 2H), 5.66 (q,  $J = 7.2$  Hz, 1H), 1.67 (d,  $J = 7.2$  Hz, 3H), 1.36 (s, 9H);  $^{13}\text{C}$  NMR (100 MHz,  $\text{CDCl}_3$ )  $\delta$  151.2, 140.6, 134.2, 133.5, 128.7, 128.2, 125.0, 60.3, 34.6, 31.4, 18.2; HRMS (EI) calcd for  $\text{C}_{24}\text{H}_{27}\text{NO}_4\text{S}_2$   $[\text{M}]$ : 457.1381, found: 457.1380; HPLC (DAICEL Chiralpak AD-H, hexane/ isopropanol =

9/1, flow 0.7 mL/min, detection at 214 nm) retention time = 9.6 min (minor) and 10.7 min (major).

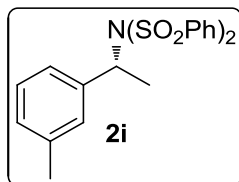

White solid;  $^1\text{H}$  NMR (400 MHz,  $\text{CDCl}_3$ )  $\delta$  7.73 (bs, 4H), 7.57 (t,  $J = 7.2$  Hz, 2H), 7.43 (t,  $J = 7.2$  Hz, 4H), 7.26 (d,  $J = 7.2$  Hz, 1H), 7.19 (t,  $J = 7.6$  Hz, 1H), 7.15 (s, 1H), 7.09 (d,  $J = 7.2$  Hz, 1H), 5.62 (q,  $J = 7.2$  Hz, 1H), 2.23 (s, 3H), 1.65 (d,  $J = 7.2$  Hz, 3H).  $^{13}\text{C}$  NMR (100MHz,  $\text{CDCl}_3$ )  $\delta$  140.5, 137.6, 137.2, 133.4, 129.6, 128.6, 128.3, 128.2, 128.0, 125.6, 60.3, 21.3, 18.1; HRMS (ESI) calcd for  $\text{C}_{21}\text{H}_{21}\text{NO}_4\text{S}_2\text{Na}$   $[\text{M}+\text{Na}]^+$ : 438.0804, found: 438.0823; HPLC (DAICEL Chiralpak AD-H, hexane/isopropanol = 7/3, flow 0.7 mL/min, detection at 214 nm) retention time = 7.1 min (minor) and 9.0 min (major).

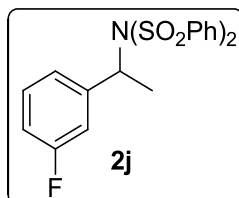

White solid;  $^1\text{H}$  NMR (400 MHz,  $\text{CDCl}_3$ )  $\delta$  7.76 (s, 4H), 7.60 (t,  $J = 7.6$  Hz, 2H), 7.46 (t,  $J = 7.6$  Hz, 4H), 7.28 – 7.20 (m, 2H), 7.12 (d,  $J = 10.4$  Hz, 1H), 7.06 – 6.90 (m, 1H), 5.57 (q,  $J = 7.2$  Hz, 1H), 1.64 (d,  $J = 7.2$  Hz, 3H);  $^{13}\text{C}$  NMR (100 MHz,  $\text{CDCl}_3$ )  $\delta$  162.6 (d,  $J = 245.2$  Hz), 140.3, 140.1 (d,  $J = 7.6$  Hz), 133.7, 129.5 (d,  $J = 8.5$  Hz), 128.8, 128.2, 124.3 (d,  $J = 3.2$  Hz), 115.8 (d,  $J = 22.0$  Hz), 114.9 (d,  $J = 20.4$  Hz), 59.6, 59.6, 18.0; HRMS (ESI) calcd for  $\text{C}_{20}\text{H}_{22}\text{FN}_2\text{O}_4\text{S}_2$   $[\text{M}+\text{NH}_4]^+$ : 437.1000, found: 437.1002; HPLC (DAICEL Chiralpak AD-H, hexane/isopropanol = 7/3, flow 0.7 mL/min, detection at 214 nm) retention time = 7.8 min (minor) and 9.6 min (major).

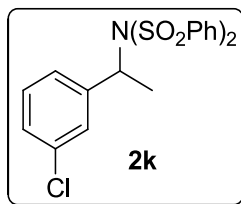

White solid;  $^1\text{H}$  NMR (400 MHz,  $\text{CDCl}_3$ )  $\delta$  7.76 (bs, 4H), 7.61 (t,  $J = 7.6$  Hz, 2H), 7.47 (t,  $J = 7.6$  Hz, 4H), 7.35 – 7.26 (m, 3H), 7.24 – 7.16 (m, 1H), 5.56 (q,  $J = 7.2$  Hz, 1H), 1.64 (d,  $J = 7.2$  Hz, 3H);  $^{13}\text{C}$  NMR (100 MHz,  $\text{CDCl}_3$ )  $\delta$  139.6, 134.1, 133.8, 129.4, 129.0, 128.9, 128.2, 128.1, 126.7, 59.6, 18.0; HRMS (ESI) calcd for  $\text{C}_{20}\text{H}_{22}\text{ClN}_2\text{O}_4\text{S}_2$   $[\text{M}+\text{NH}_4]^+$ : 453.0704, found: 453.0703; HPLC (DAICEL Chiralpak AD-H, hexane/ isopropanol = 7/3, flow 0.7 mL/min, detection at 214 nm) retention time = 7.7 min (minor) and 9.9 min (major).

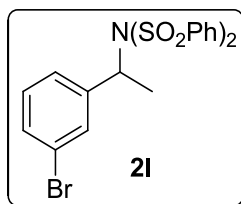

White solid;  $^1\text{H}$  NMR (400 MHz,  $\text{CDCl}_3$ )  $\delta$  7.77 (bs, 4H), 7.61 (t,  $J = 7.6$  Hz, 2H), 7.47 (t,  $J = 7.6$  Hz, 5H), 7.44 – 7.34 (m, 2H), 7.15 (t,  $J = 8.0$  Hz, 1H), 5.55 (q,  $J = 7.2$  Hz, 1H), 1.63 (d,  $J = 7.2$  Hz, 3H);  $^{13}\text{C}$  NMR (100 MHz,  $\text{CDCl}_3$ )  $\delta$  139.8, 133.8, 131.8, 131.1, 129.7, 128.9, 128.2, 127.1, 122.3, 59.5, 18.0; HRMS (ESI) calcd for  $\text{C}_{20}\text{H}_{22}\text{BrN}_2\text{O}_4\text{S}_2$   $[\text{M}+\text{NH}_4]^+$ : 497.0199, found: 497.0195; HPLC (DAICEL Chiralpak AD-H, hexane/ isopropanol = 7/3, flow 0.7 mL/min, detection at 214 nm) retention time = 7.6 min (minor) and 10.1 min (major).

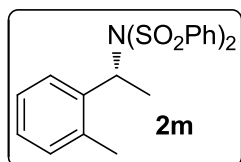

White solid;  $^1\text{H}$  NMR (400 MHz,  $\text{CDCl}_3$ )  $\delta$  7.73 (bs, 4H), 7.62 (d,  $J = 7.6$  Hz, 1H), 7.52 (t,  $J = 7.6$  Hz, 2H), 7.36 (t,  $J = 7.6$  Hz, 4H), 7.25 (t,  $J = 7.6$  Hz, 1H), 7.12 (t,  $J =$

7.2 Hz, 1H), 6.66 (d,  $J = 8.0$  Hz, 1H), 5.98 (q,  $J = 7.2$  Hz, 1H), 1.99 (s, 3H), 1.89 (d,  $J = 7.2$  Hz, 3H);  $^{13}\text{C}$  NMR (100 MHz,  $\text{CDCl}_3$ )  $\delta$  140.7, 139.0, 133.7, 133.1, 130.2, 130.0, 128.5, 128.4, 128.1, 125.7, 58.2, 19.9, 19.4; HRMS (ESI) calcd for  $\text{C}_{21}\text{H}_{21}\text{NO}_4\text{S}_2\text{Na}$   $[\text{M}+\text{Na}]^+$ : 438.0804, found: 438.0811; HPLC (DAICEL Chiralpak AD-H, hexane/ isopropanol = 9/1, flow 0.7 mL/min, detection at 214 nm) retention time = 24.9 min (minor) and 33.8 min (major).

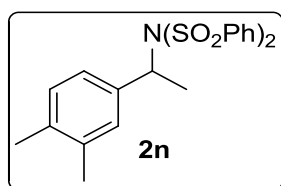

White solid;  $^1\text{H}$  NMR (400 MHz,  $\text{CDCl}_3$ )  $\delta$  7.75 (br, 4H), 7.58 (t,  $J = 7.6$  Hz, 2H), 7.42 (t,  $J = 7.6$  Hz, 4H), 7.18 (d,  $J = 8.0$  Hz, 1H), 7.08 – 7.05 (m, 2H), 5.63 (q,  $J = 7.2$  Hz, 1H), 2.26 (s, 3H), 2.12 (s, 3H), 1.67 (d,  $J = 7.2$  Hz, 3H);  $^{13}\text{C}$  NMR (100 MHz,  $\text{CDCl}_3$ )  $\delta$  140.6, 136.4, 136.1, 134.7, 133.4, 130.2, 129.2, 128.7, 128.2, 125.9, 60.4, 19.7, 19.5, 18.2; HRMS (ESI) calcd for  $\text{C}_{22}\text{H}_{27}\text{N}_2\text{O}_4\text{S}_2$   $[\text{M}+\text{NH}_4]^+$ : 447.1407, found: 447.1409; HPLC (DAICEL Chiralpak AD-H, hexane/ isopropanol = 9/1, flow 0.7 mL/min, detection at 214 nm) retention time = 10.5 min (minor) and 15.0 min (major).

### **X-Ray structure of enantiopure 2a and (L12)PdCl<sub>2</sub>**

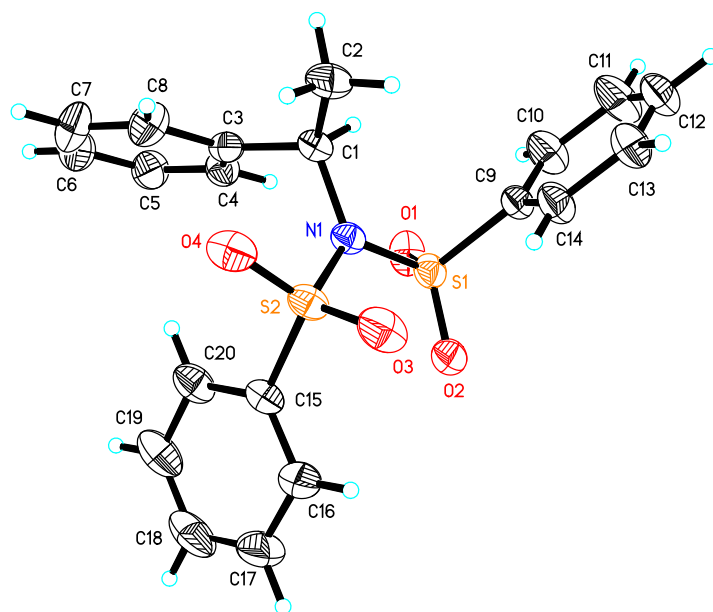

| Crystal data and structure refinement for <b>2a</b> |                                                                 |
|-----------------------------------------------------|-----------------------------------------------------------------|
| Identification code                                 | cd213489                                                        |
| Empirical formula                                   | C <sub>20</sub> H <sub>19</sub> N O <sub>4</sub> S <sub>2</sub> |
| Formula weight                                      | 401.48                                                          |
| Temperature                                         | 293(2) K                                                        |
| Wavelength                                          | 0.71073 Å                                                       |
| Crystal system                                      | Monoclinic                                                      |
| space group                                         | P2(1)                                                           |
| Unit cell dimensions                                | a = 8.4228(10) Å      α = 90 °                                  |
|                                                     | b = 13.7083(17) Å      β = 104.508(2) °                         |
|                                                     | c = 8.6714(11) Å      γ = 90°                                   |
| Volume                                              | 969.3(2) Å <sup>3</sup>                                         |
| Z                                                   | 2                                                               |
| Calculated density                                  | 1.376 Mg/m <sup>3</sup>                                         |
| Absorption coefficient                              | 0.300 mm <sup>-1</sup>                                          |
| F(000)                                              | 420                                                             |



|                                   |                                                   |
|-----------------------------------|---------------------------------------------------|
| Crystal size                      | 0.212 x 0.175 x 0.114 mm <sup>3</sup>             |
| Theta range for data collection   | 2.43 to 26.00 °                                   |
| Limiting indices                  | -10≤h≤10, -15≤k≤16, -10≤l≤10                      |
| Reflections collected             | 5776                                              |
| unique                            | 3147 [R(int) = 0.0429]                            |
| Completeness to theta = 26.00 °   | 99.9 %                                            |
| Absorption correction             | Empirical                                         |
| Max. and min. transmission        | 1.00000 and 0.46327                               |
| Refinement method                 | Full-matrix least-squares on F <sup>2</sup>       |
| Data / restraints / parameters    | 3147 / 1 / 246                                    |
| Goodness-of-fit on F <sup>2</sup> | 1.059                                             |
| Final R indices [I>2sigma(I)]     | R <sub>1</sub> = 0.0426, wR <sub>2</sub> = 0.1018 |
| R indices (all data)              | R <sub>1</sub> = 0.0450, wR <sub>2</sub> = 0.1040 |
| Absolute structure parameter      | 0.05(7)                                           |
| Extinction coefficient            | 0.017(3)                                          |
| Largest diff. peak and hole       | 0.434 and -0.328 e. Å <sup>-3</sup>               |

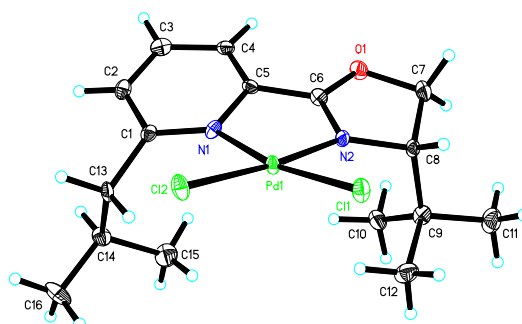

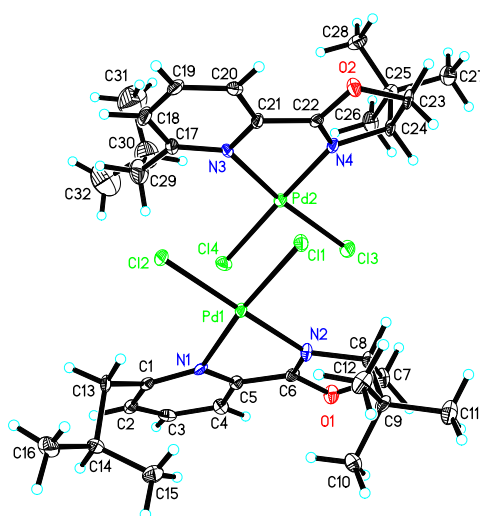

**X-ray of (L12)PdCl<sub>2</sub>**

| Crystal data and structure refinement for mo_dm14620_0m. |                                                                     |
|----------------------------------------------------------|---------------------------------------------------------------------|
| Identification code                                      | (L12)PdCl <sub>2</sub>                                              |
| Empirical formula                                        | C <sub>16</sub> H <sub>24</sub> Cl <sub>2</sub> N <sub>2</sub> O Pd |
| Formula weight                                           | 437.67                                                              |
| Temperature                                              | 130 K                                                               |
| Wavelength                                               | 0.71073 Å                                                           |
| Crystal system                                           | Monoclinic                                                          |
| space group                                              | P 1 21 1                                                            |
| Unit cell dimensions                                     | a = 12.1876(18) Å      α = 90°                                      |
|                                                          | b = 9.8204(14) Å      β = 96.796(3) °                               |
|                                                          | c = 15.854(2) Å      γ = 90°                                        |
| Volume                                                   | 1884.2(5) Å <sup>3</sup>                                            |
| Z                                                        | 4                                                                   |
| Calculated density                                       | 11.543 Mg/m <sup>3</sup>                                            |
| Absorption coefficient                                   | 1.271 mm <sup>-1</sup>                                              |
| F(000)                                                   | 888                                                                 |

|                                   |                                                   |
|-----------------------------------|---------------------------------------------------|
| Crystal size                      | 0.18 x 0.03 x 0.02 mm <sup>3</sup>                |
| Theta range for data collection   | 1.293 to 30.495 °                                 |
| Limiting indices                  | -14≤h≤17, -13≤k≤13, -22≤l≤22                      |
| Reflections collected             | 18529                                             |
| unique                            | 10955 [R(int) = 0.0640]                           |
| Completeness to theta = 26.00 °   | 99.9 %                                            |
| Absorption correction             | Empirical                                         |
| Max. and min. transmission        | 1.00000 and 0.46327                               |
| Refinement method                 | Semi-empirical from equivalents                   |
| Data / restraints / parameters    | 10955 / 40 / 407                                  |
| Goodness-of-fit on F <sup>2</sup> | 1.023                                             |
| Final R indices [I>2σ(I)]         | R <sub>1</sub> = 0.0638, wR <sub>2</sub> = 0.1180 |
| R indices (all data)              | R <sub>1</sub> = 0.0974, wR <sub>2</sub> = 0.1327 |
| Absolute structure parameter      | -0.03(4)                                          |
| Extinction coefficient            | n/a                                               |
| Largest diff. peak and hole       | 1.263 and -1.046 e.Å <sup>-3</sup>                |

## 4. Deuterium labeled experiments

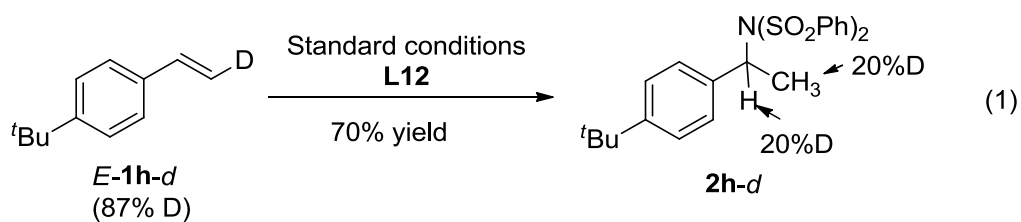

The deuterium labeled styrene *E*-**1h-d** was synthesized and subjected to the standard condition, and the hydroamination product **2h-d** was obtained as a mixture of isomers with the deuterium incorporation on both  $\alpha$  and  $\beta$  carbon (eq 1). The  $^1\text{H}$  NMR spectrum of **2h-d** was shown in Figure S1.

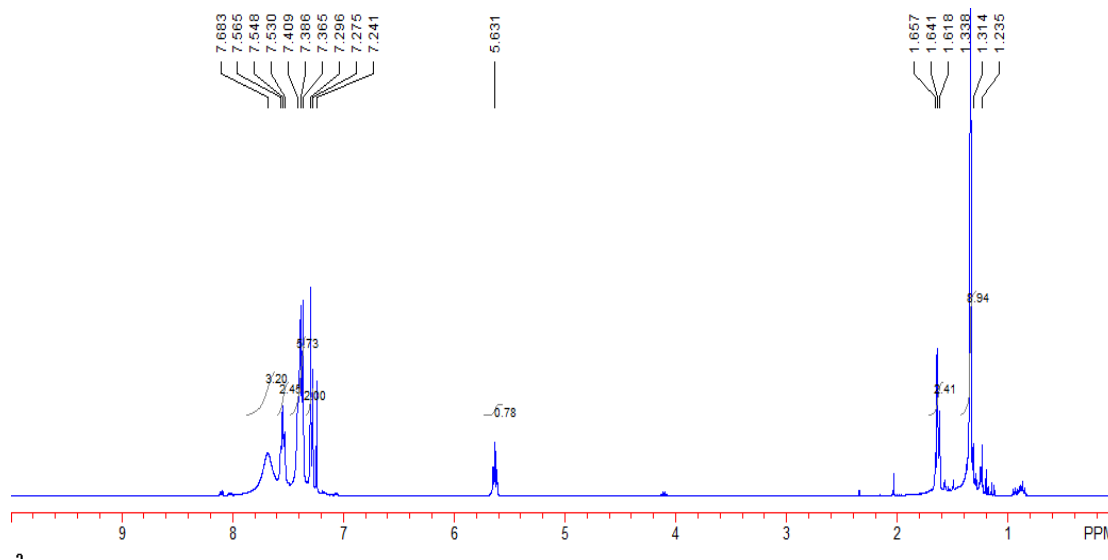

**Figure S1.**  $^1\text{H}$  NMR spectrum of **2h-d** obtained in eq 1

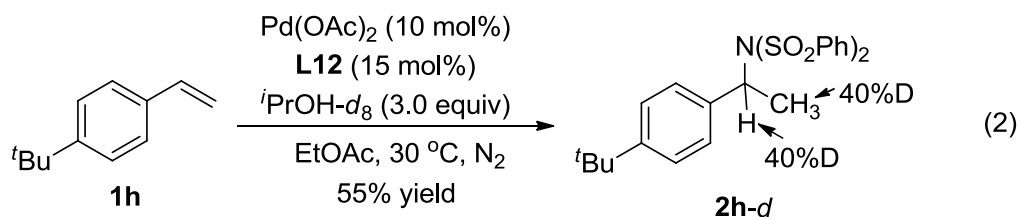

When styrene *E*-**1h-d** was subjected to the standard condition with iPrOH-d<sub>8</sub>, the same product **2h-d** was given (eq 2), however with 40% deuterium incorporation on both  $\alpha$  and  $\beta$  carbon (eq 2). The <sup>1</sup>H NMR spectrum of **2h-d** was shown in Figure S2.

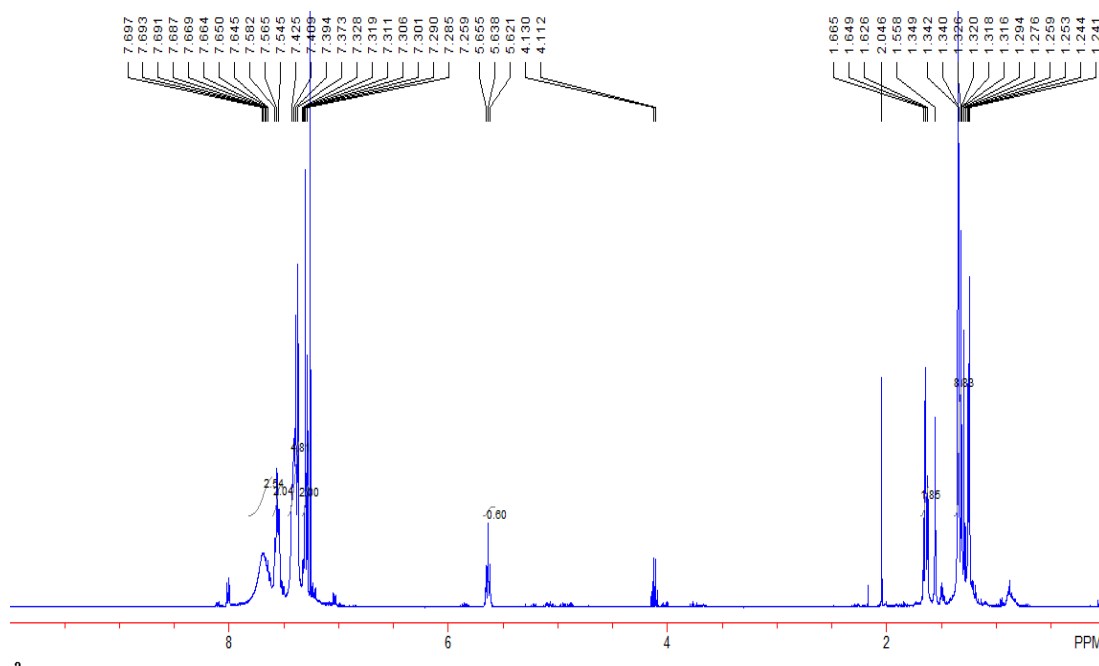

**Figure S2.**  $^1\text{H}$  NMR spectrum of **2h-d** obtained in eq 2

## Reference

- [S1] Shuman, R.T.; Ornstein, P. L.; Paschal, J. W.; Gesellchen, P. D. An improved synthesis of homoproline and derivatives. *J. Org. Chem.* **1990**, *55*, 738-741.
- [S2] Kikushima, K.; Holder, J. C.; Gatti, M.; Stoltz, B. M. Palladium-catalyzed asymmetric conjugate addition of arylboronic acids to five-, six-, and seven-membered  $\beta$ -substituted cyclic enones: Enantioselective construction of all-carbon quaternary stereocenters. *J. Am. Chem. Soc.* **2011**, *133*, 6902–6905.
- [S3] Werner, E. W.; Mei, T.-S.; Burckle, A. J.; Sigman, M. S. Enantioselective heck arylations of acyclic alkenyl alcohols using a redox-relay strategy. *Science*, **2012**, *338*, 1455-1458.

## 7. NMR spectra of ligands and products

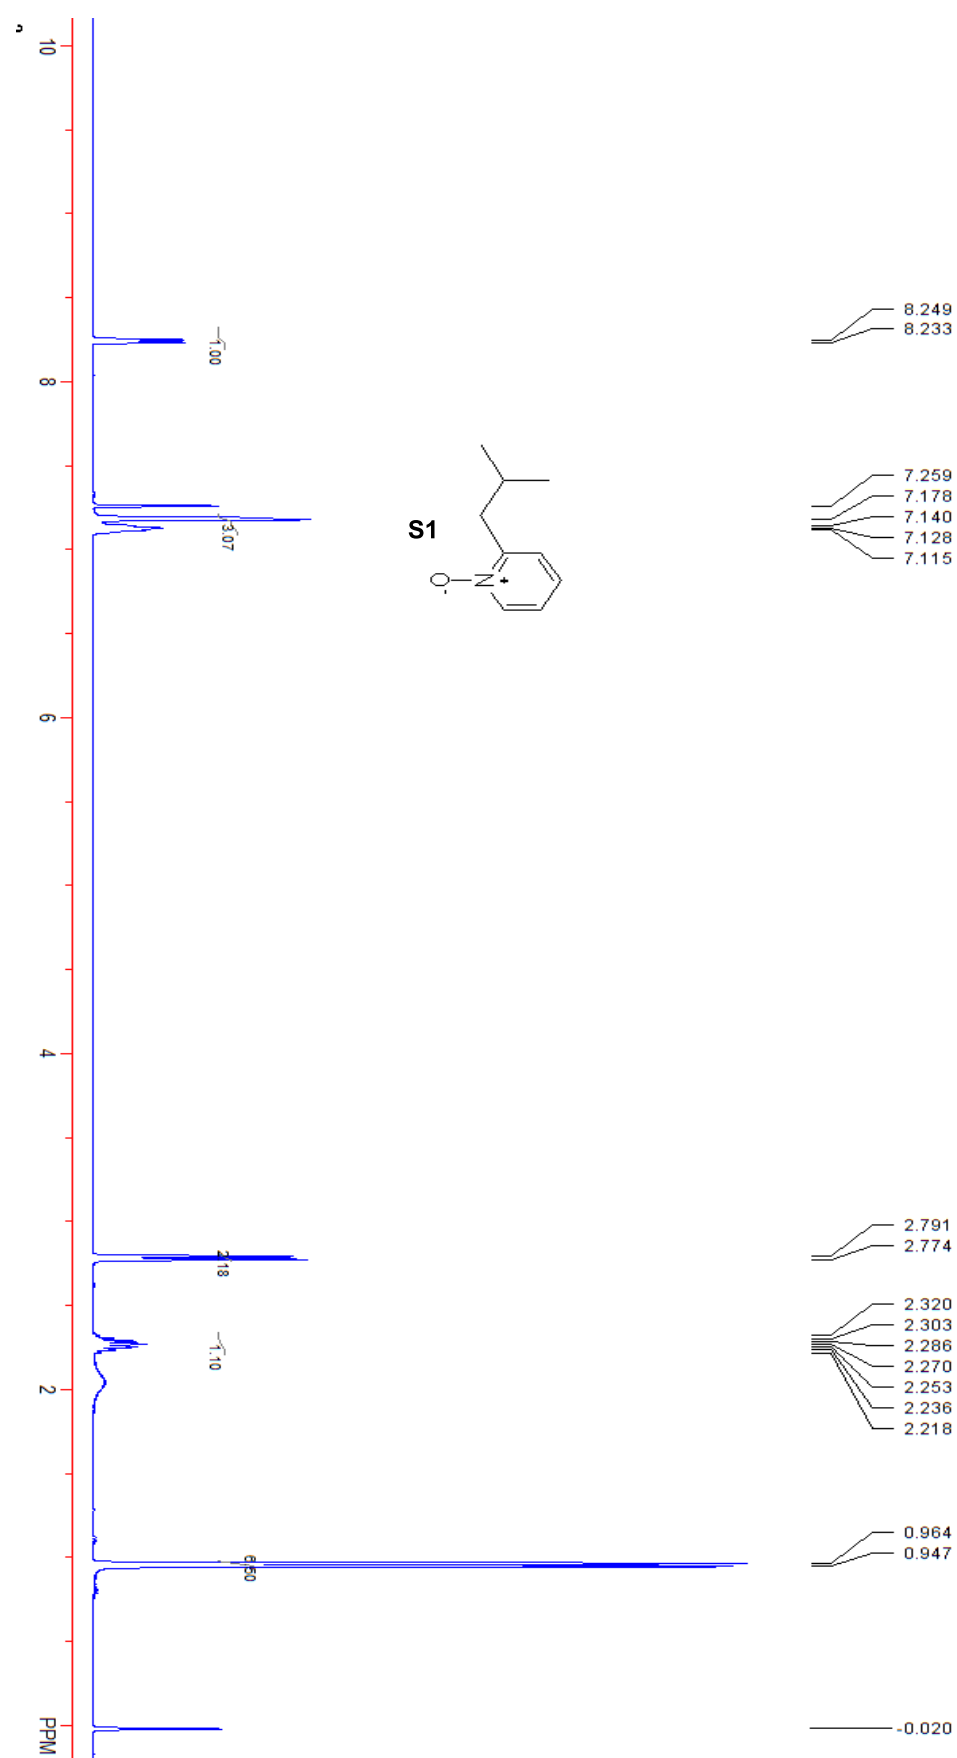

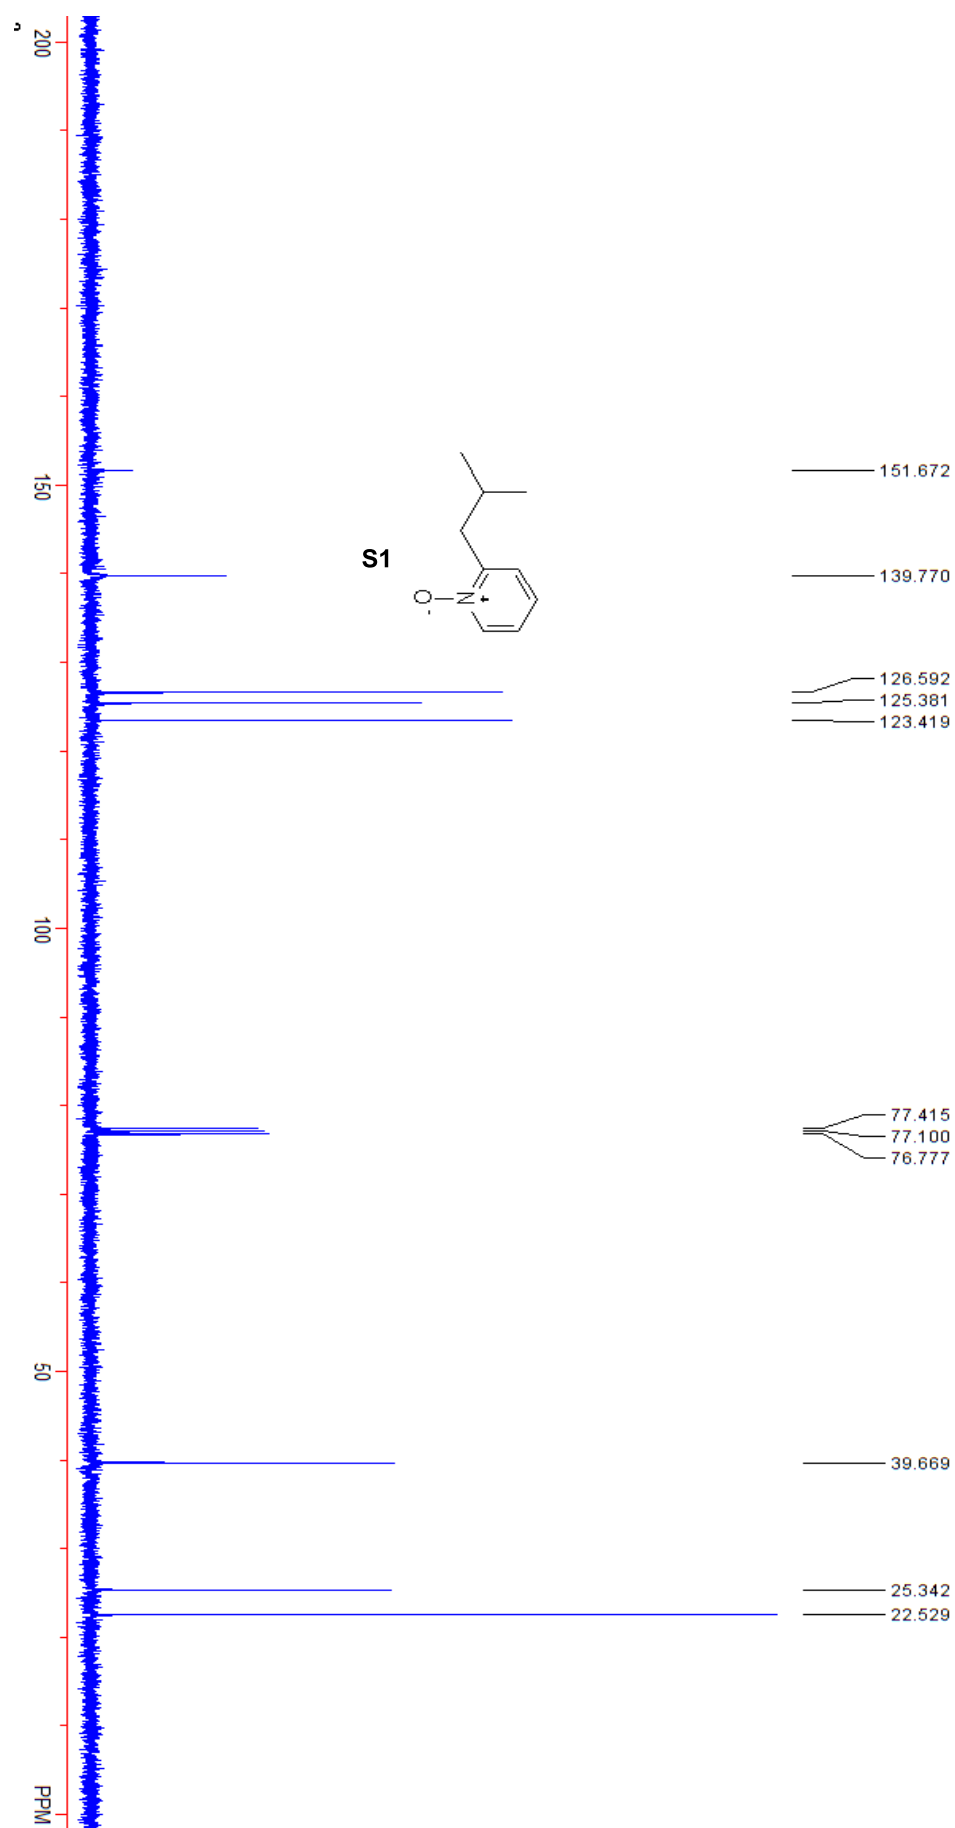

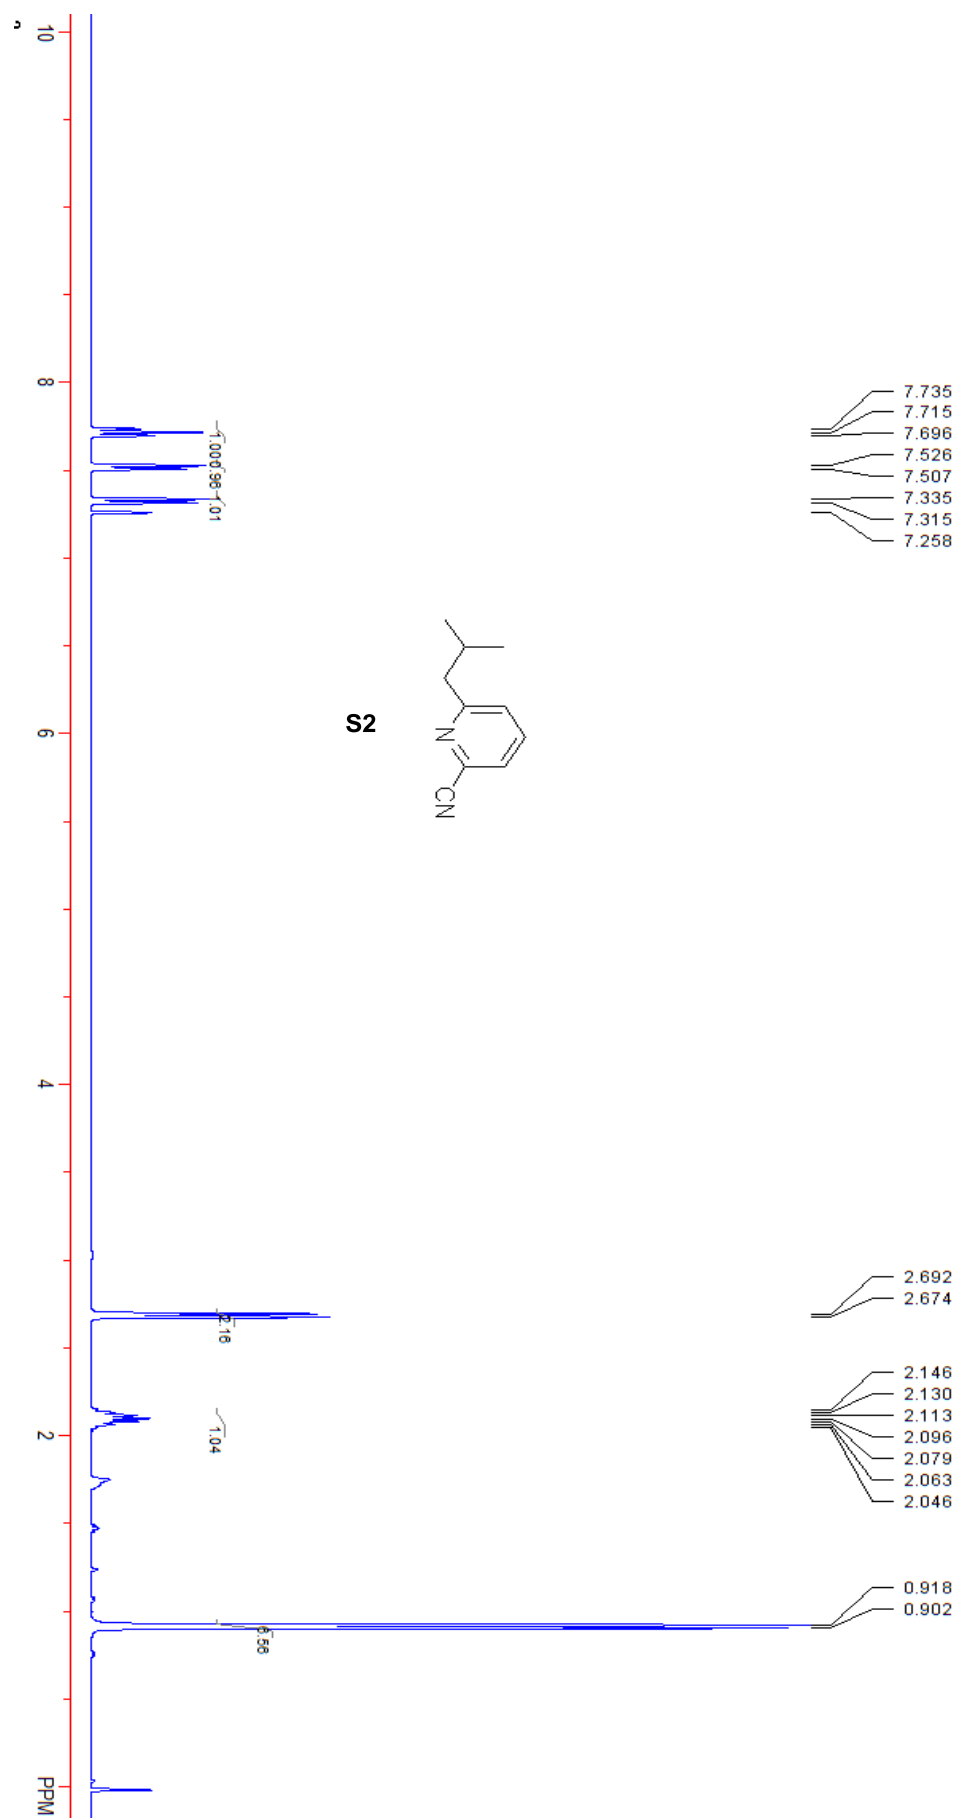



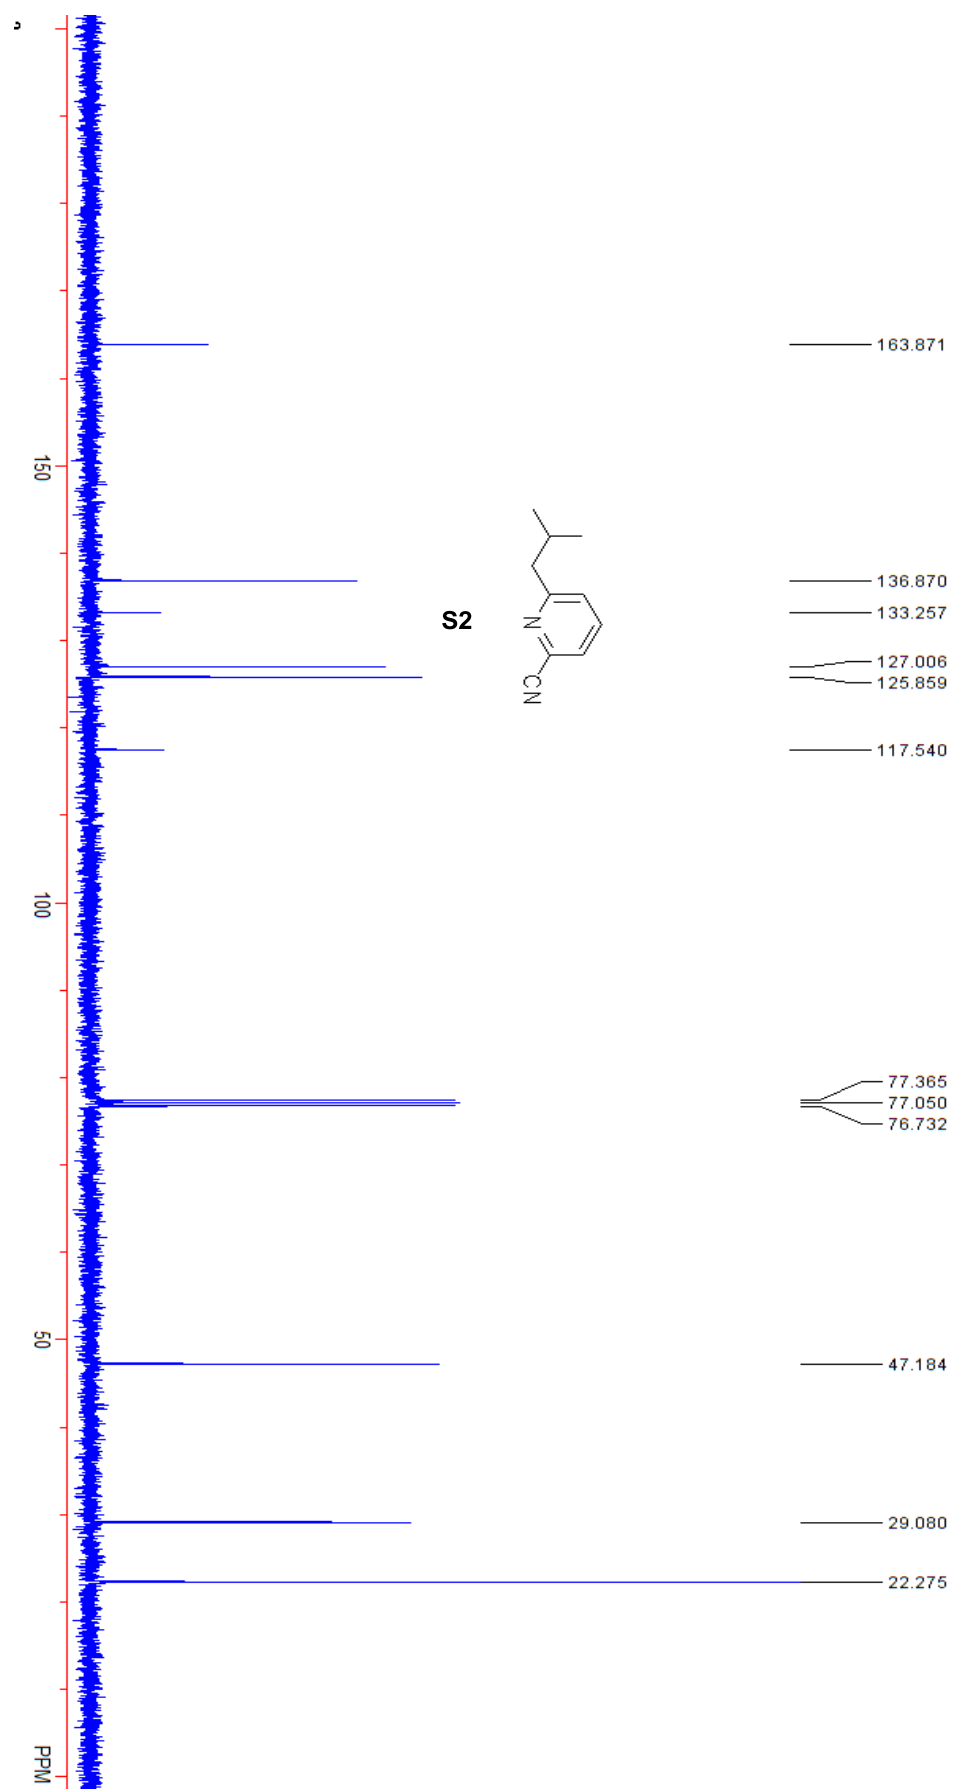

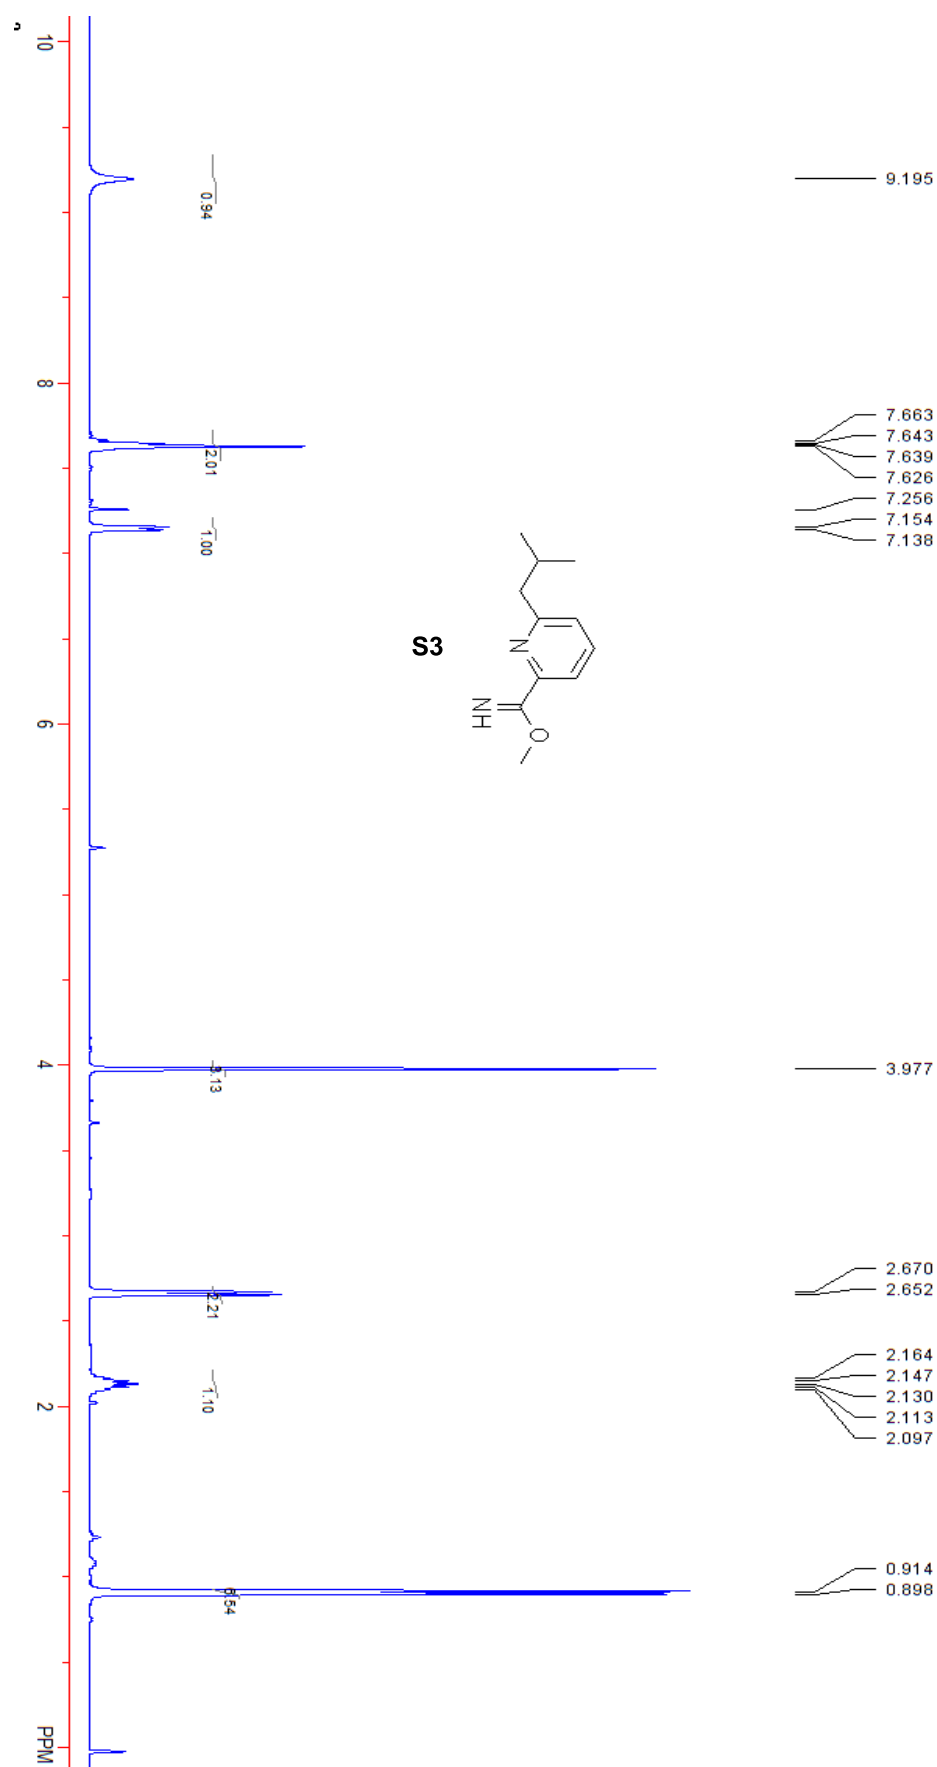

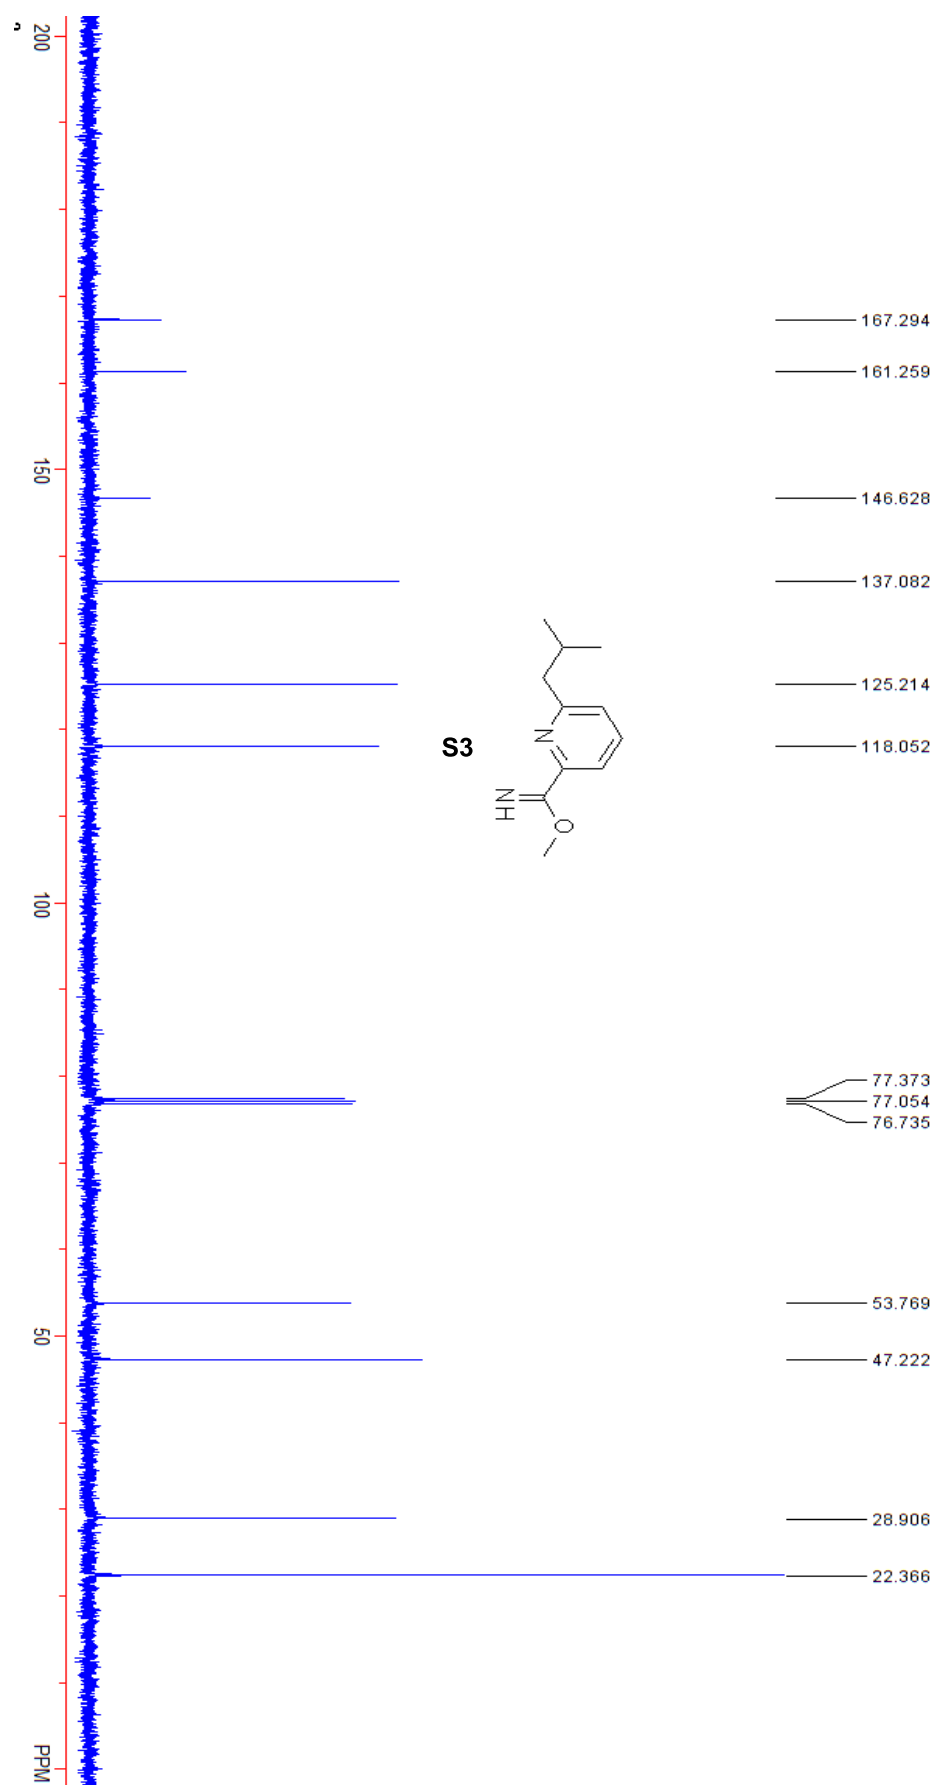

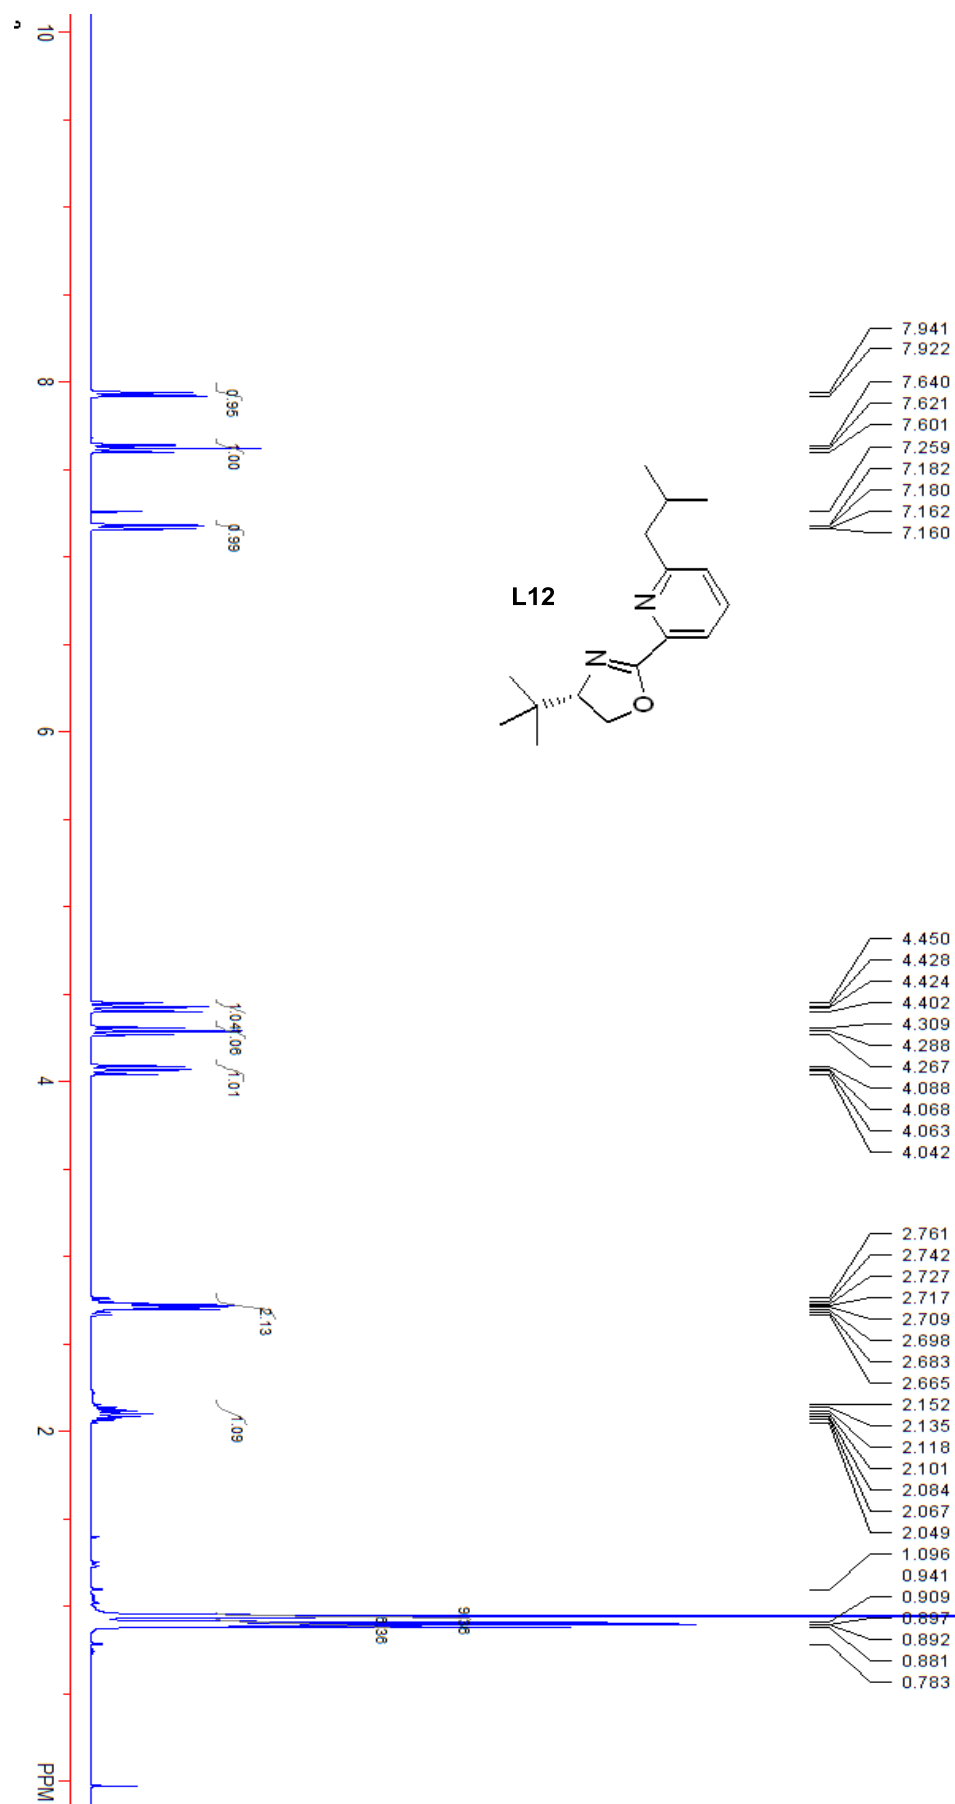





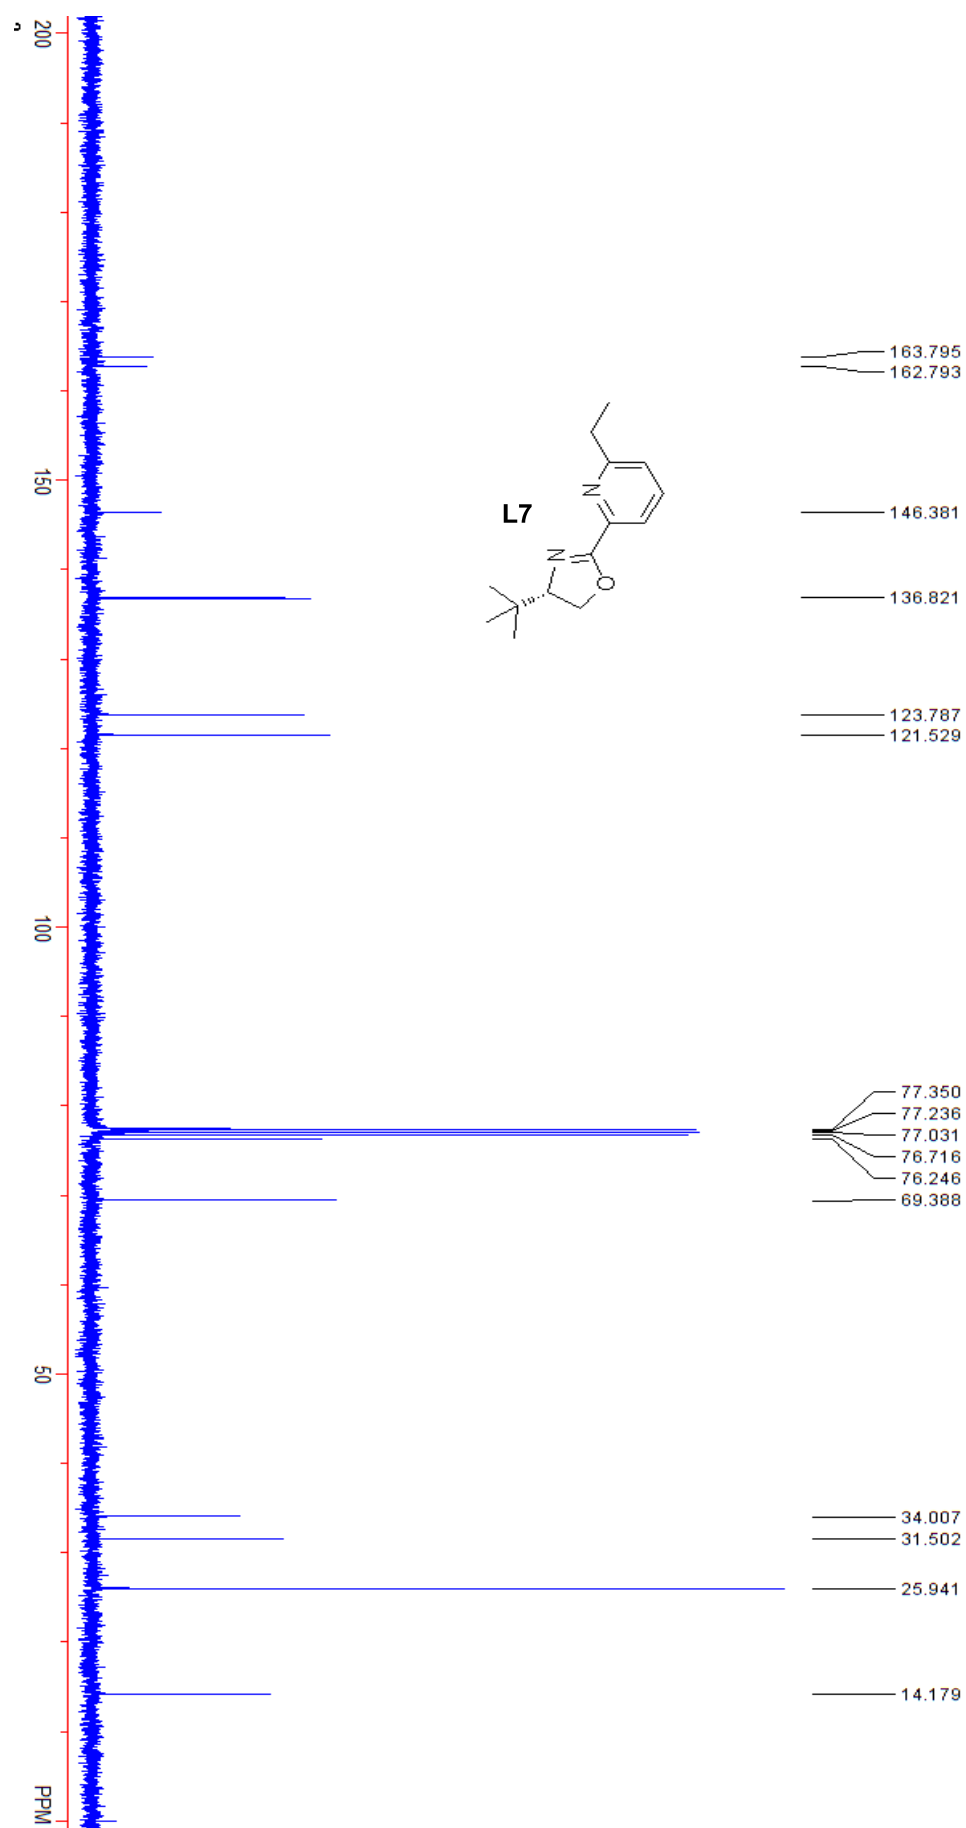

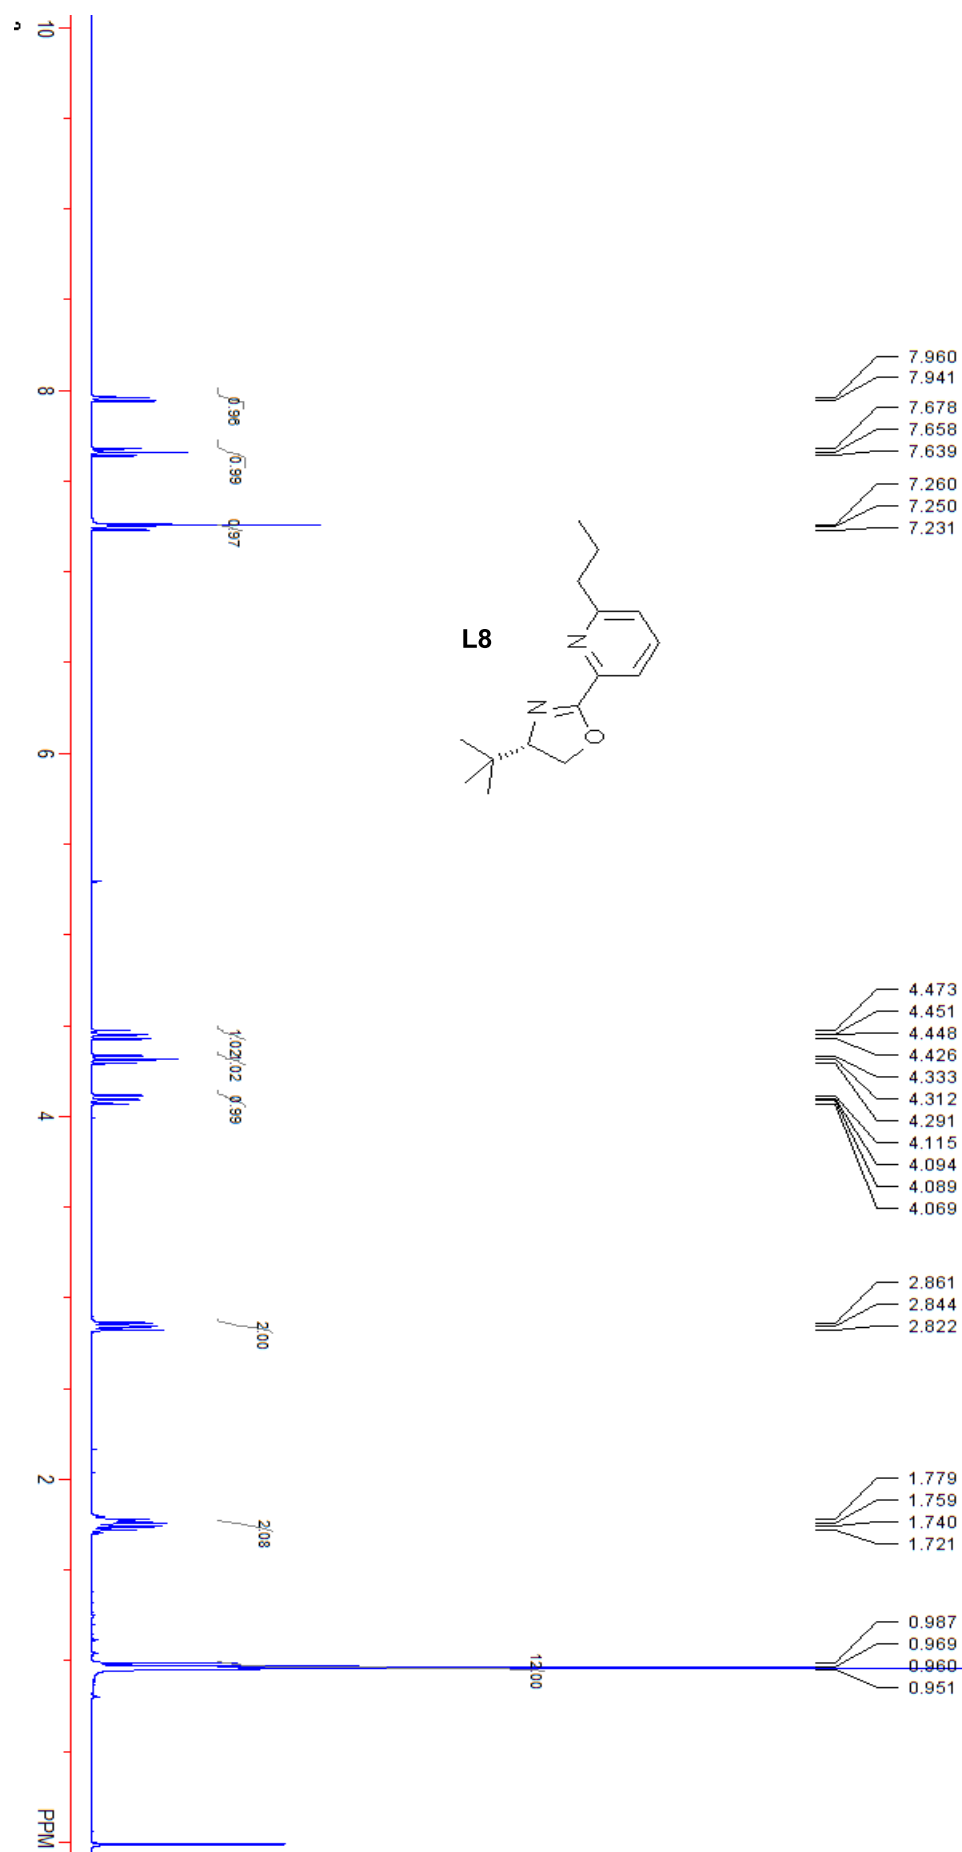



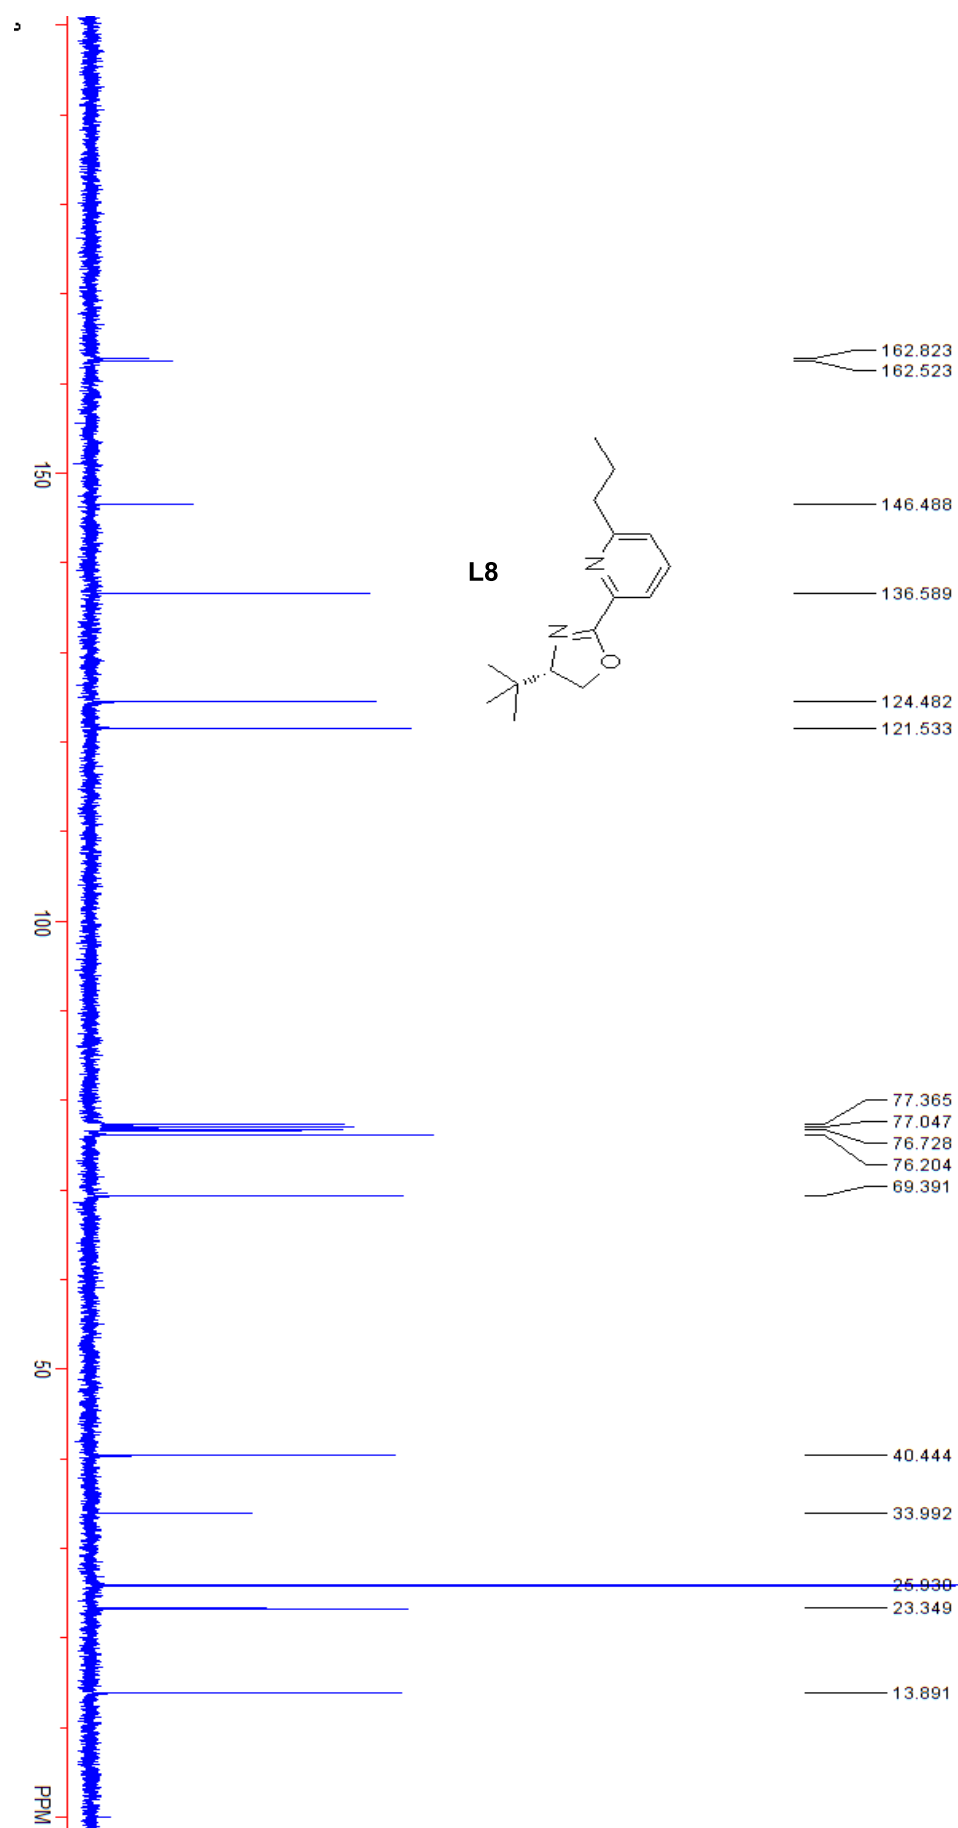



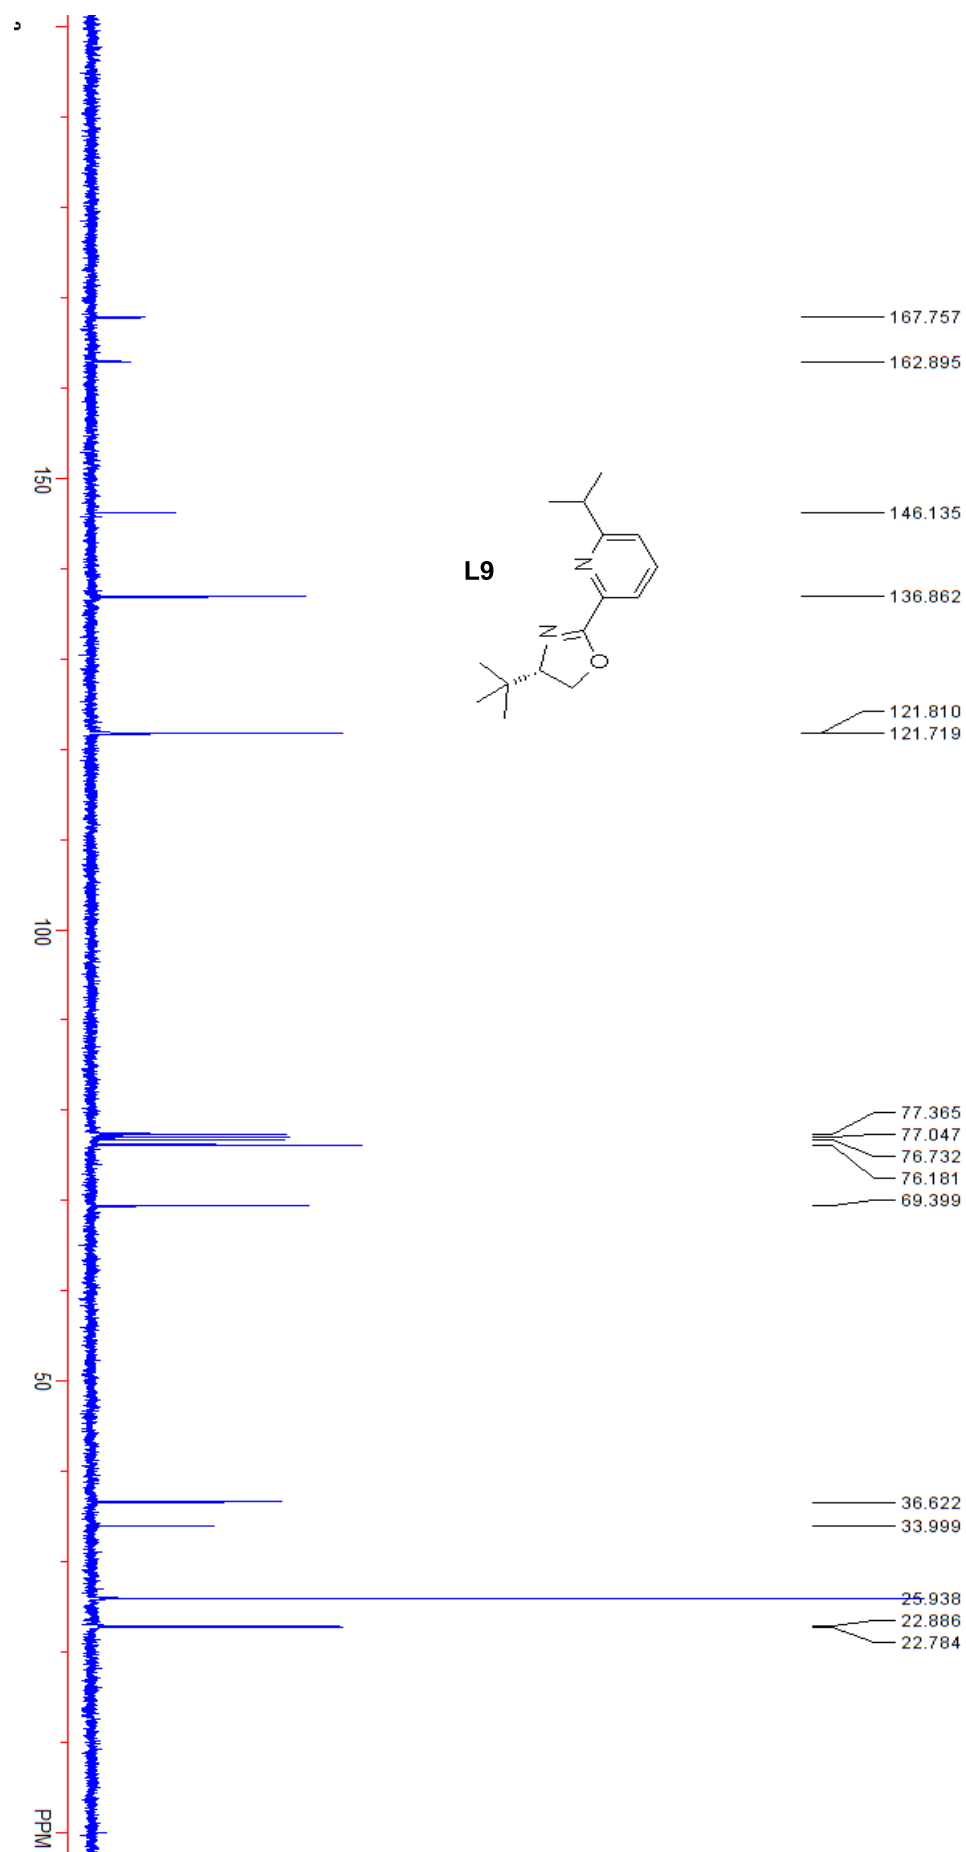

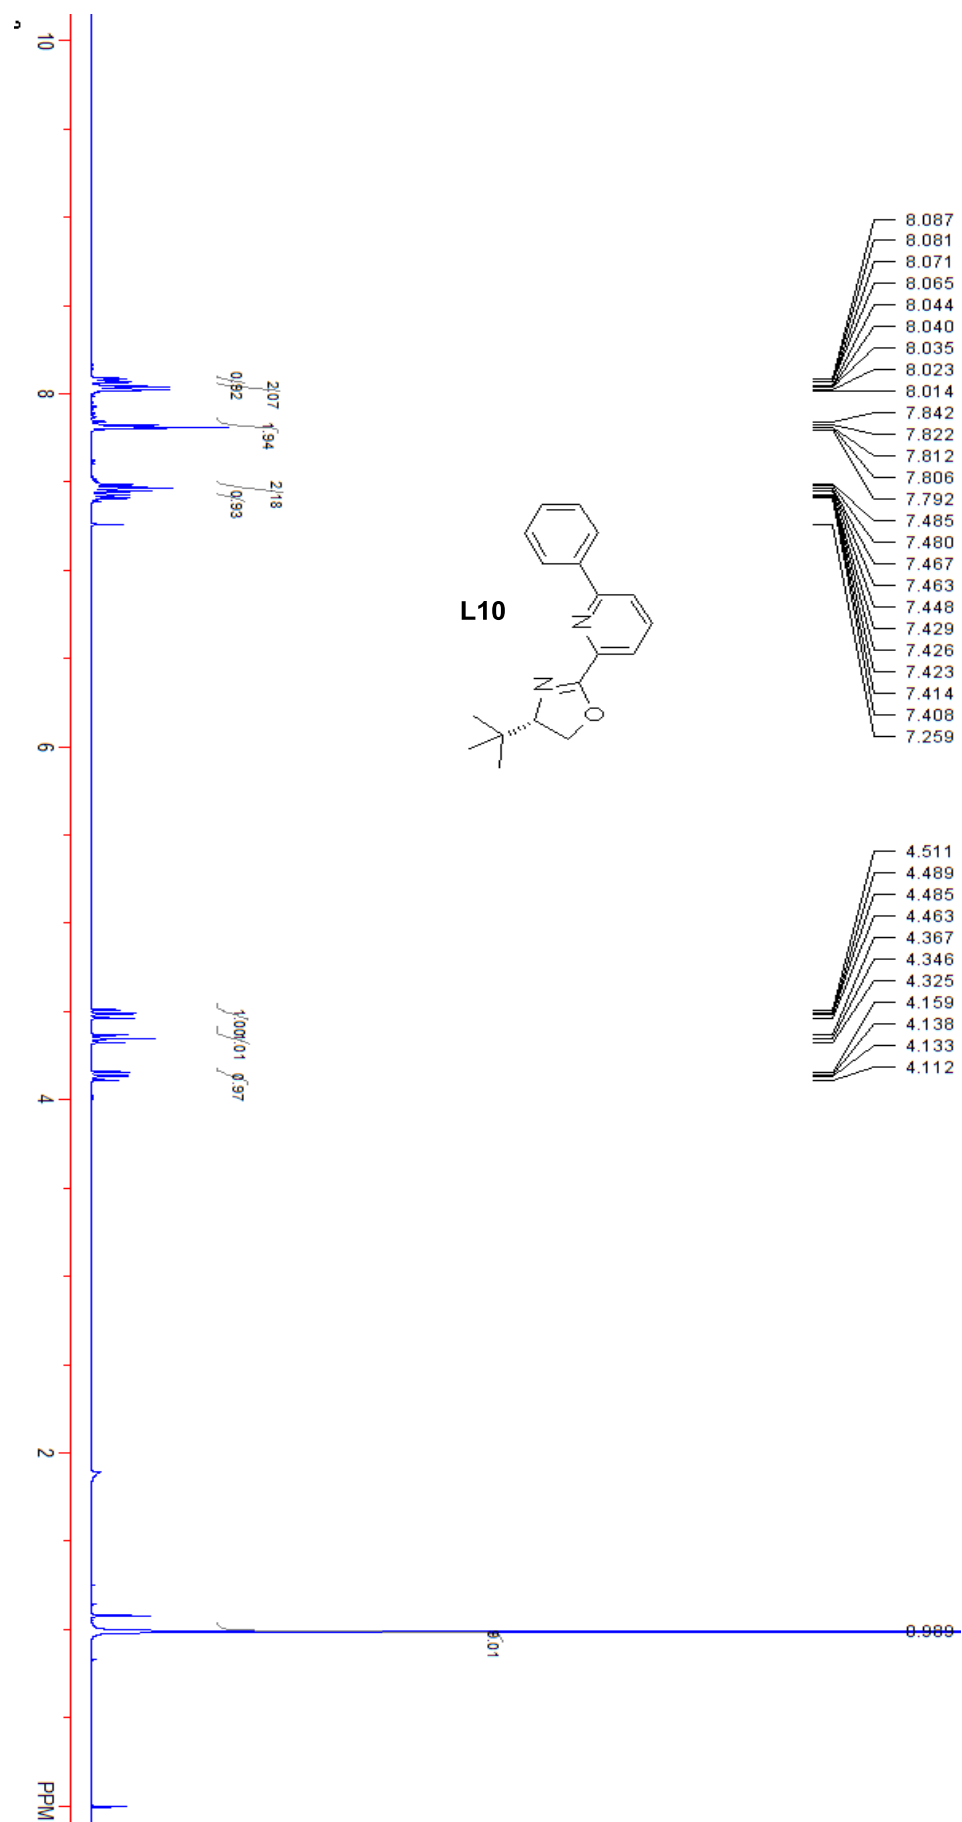

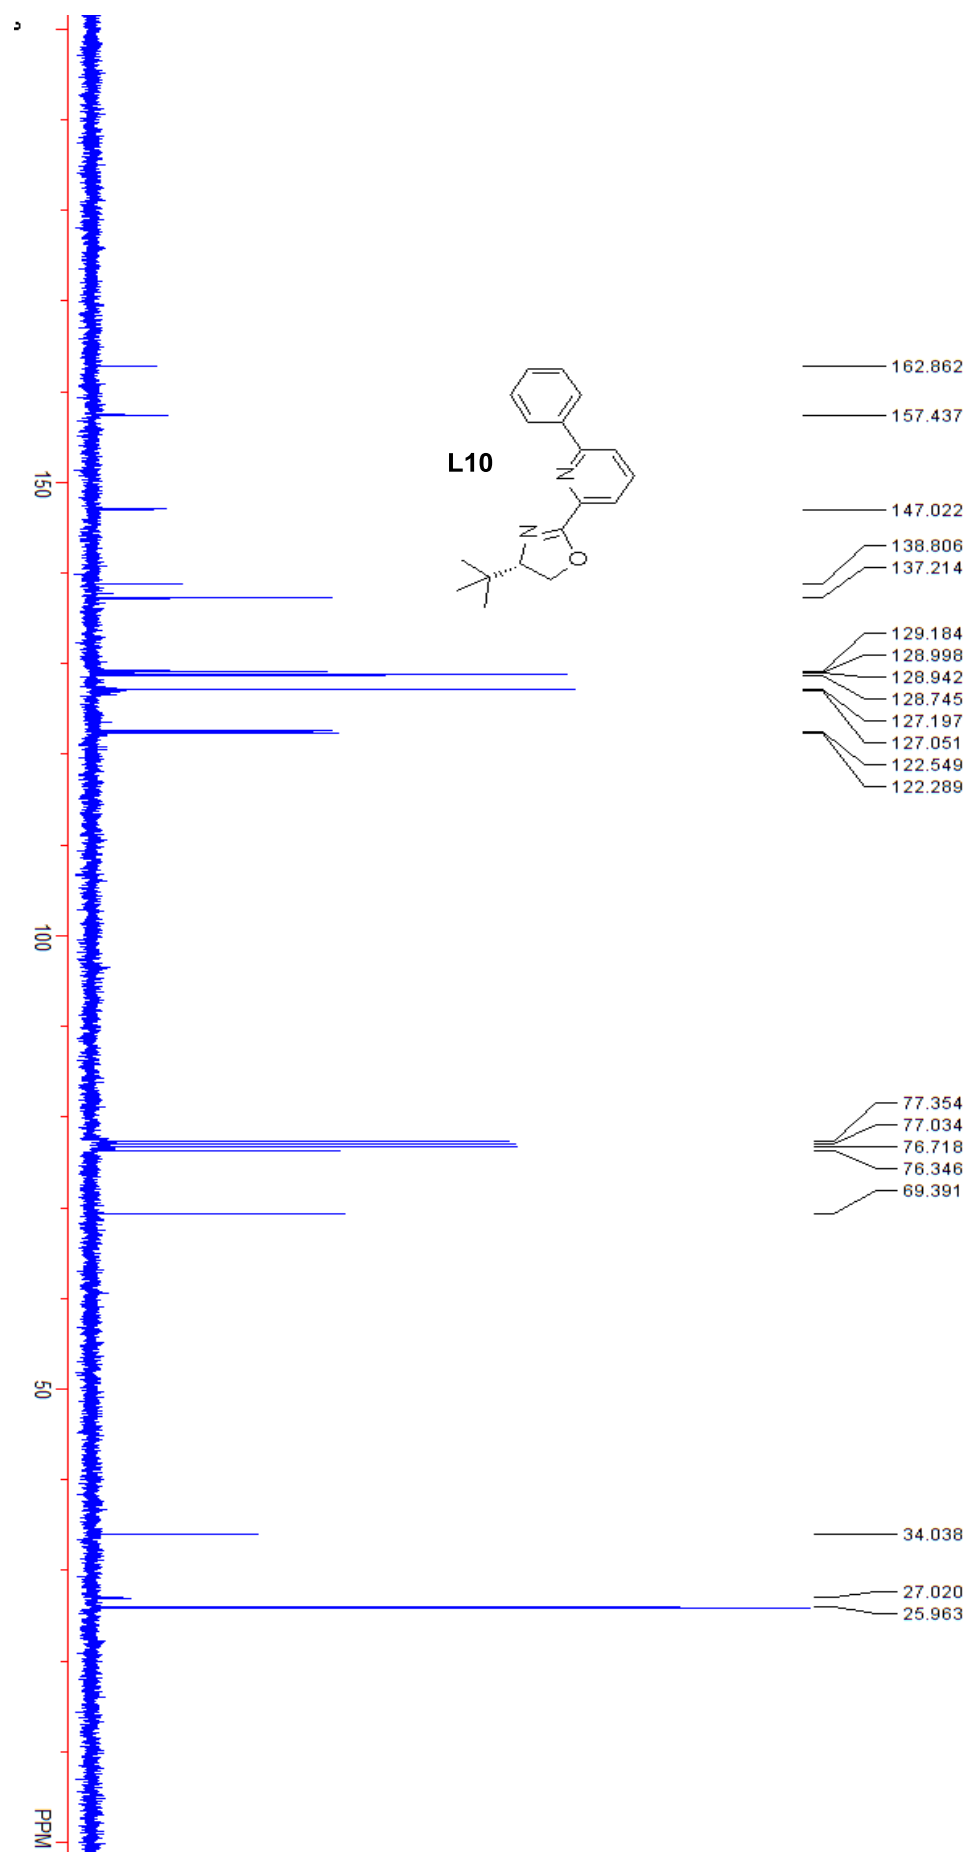

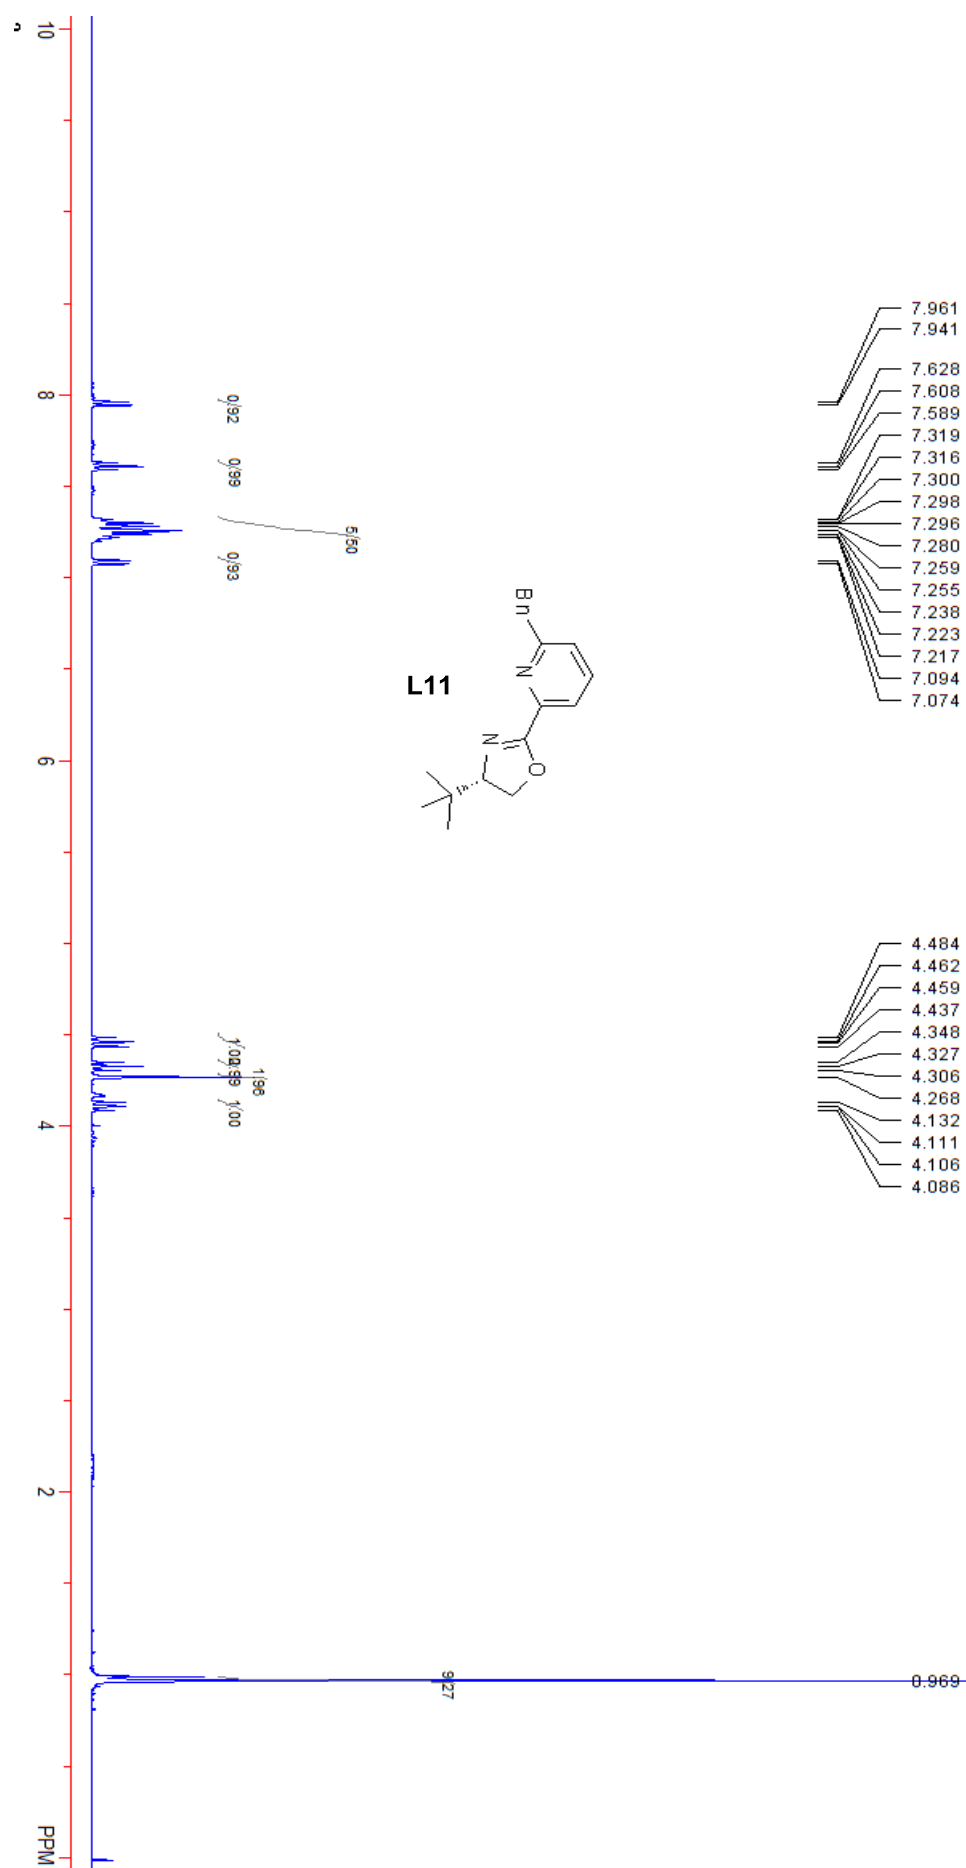

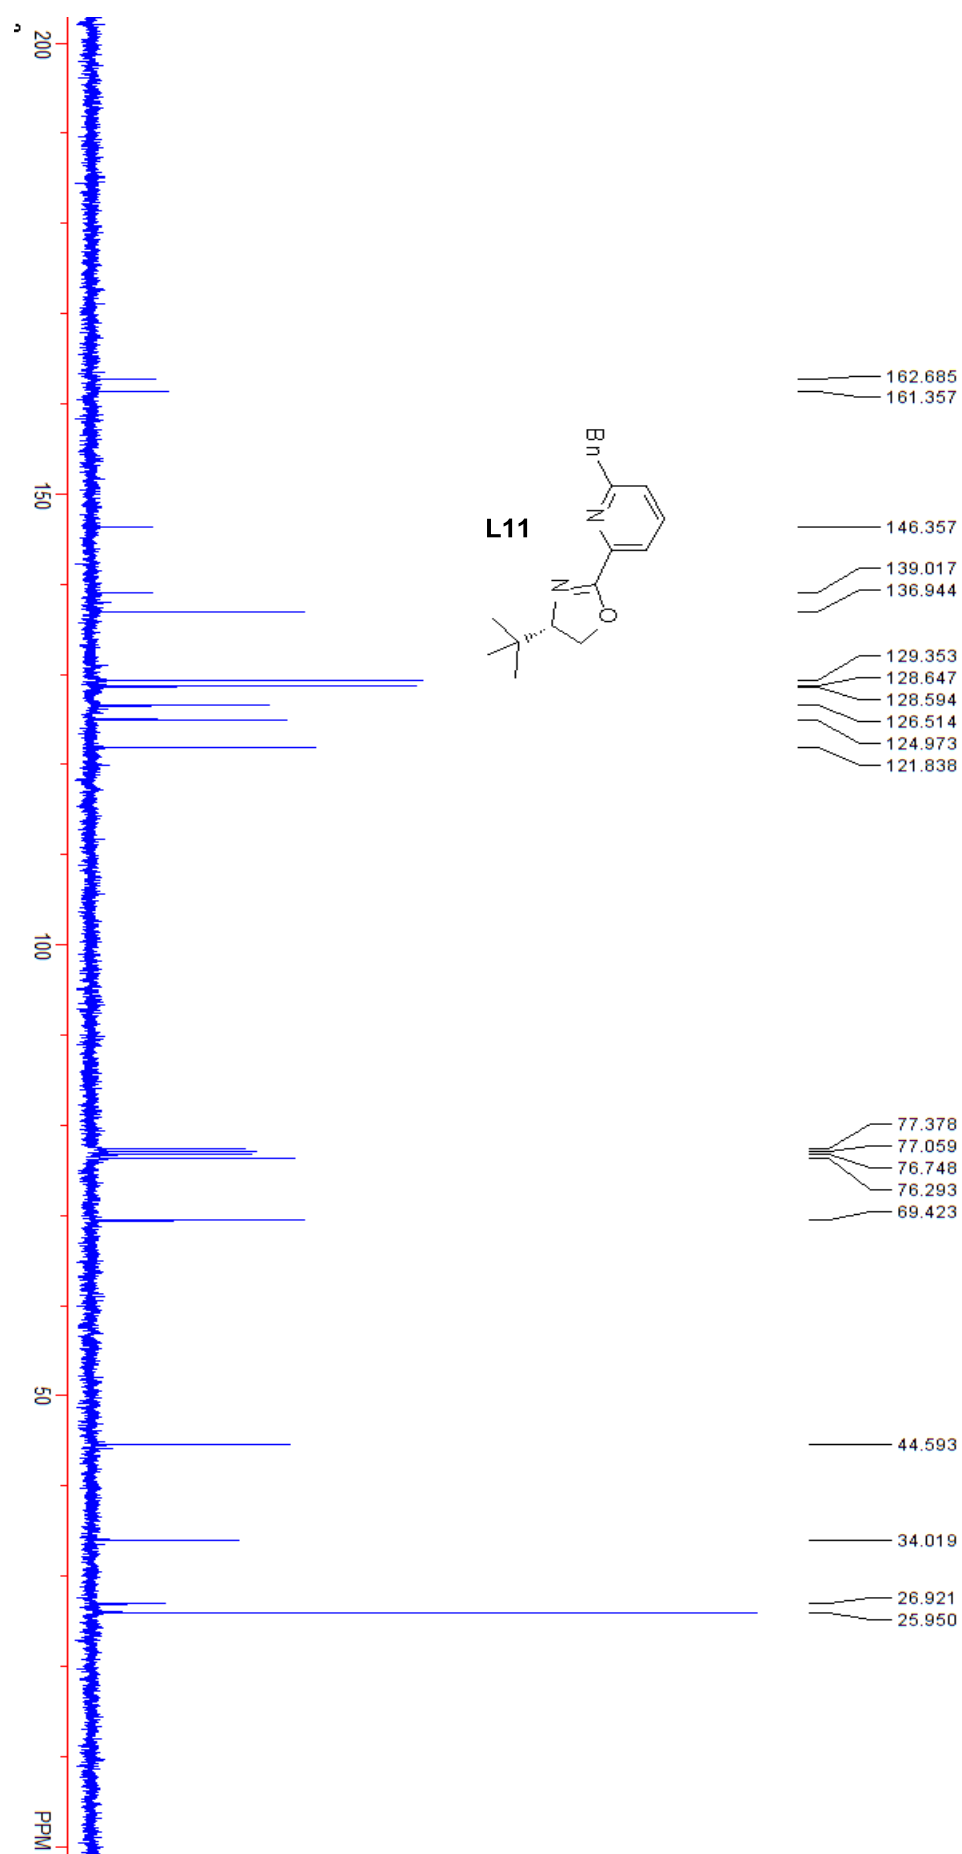

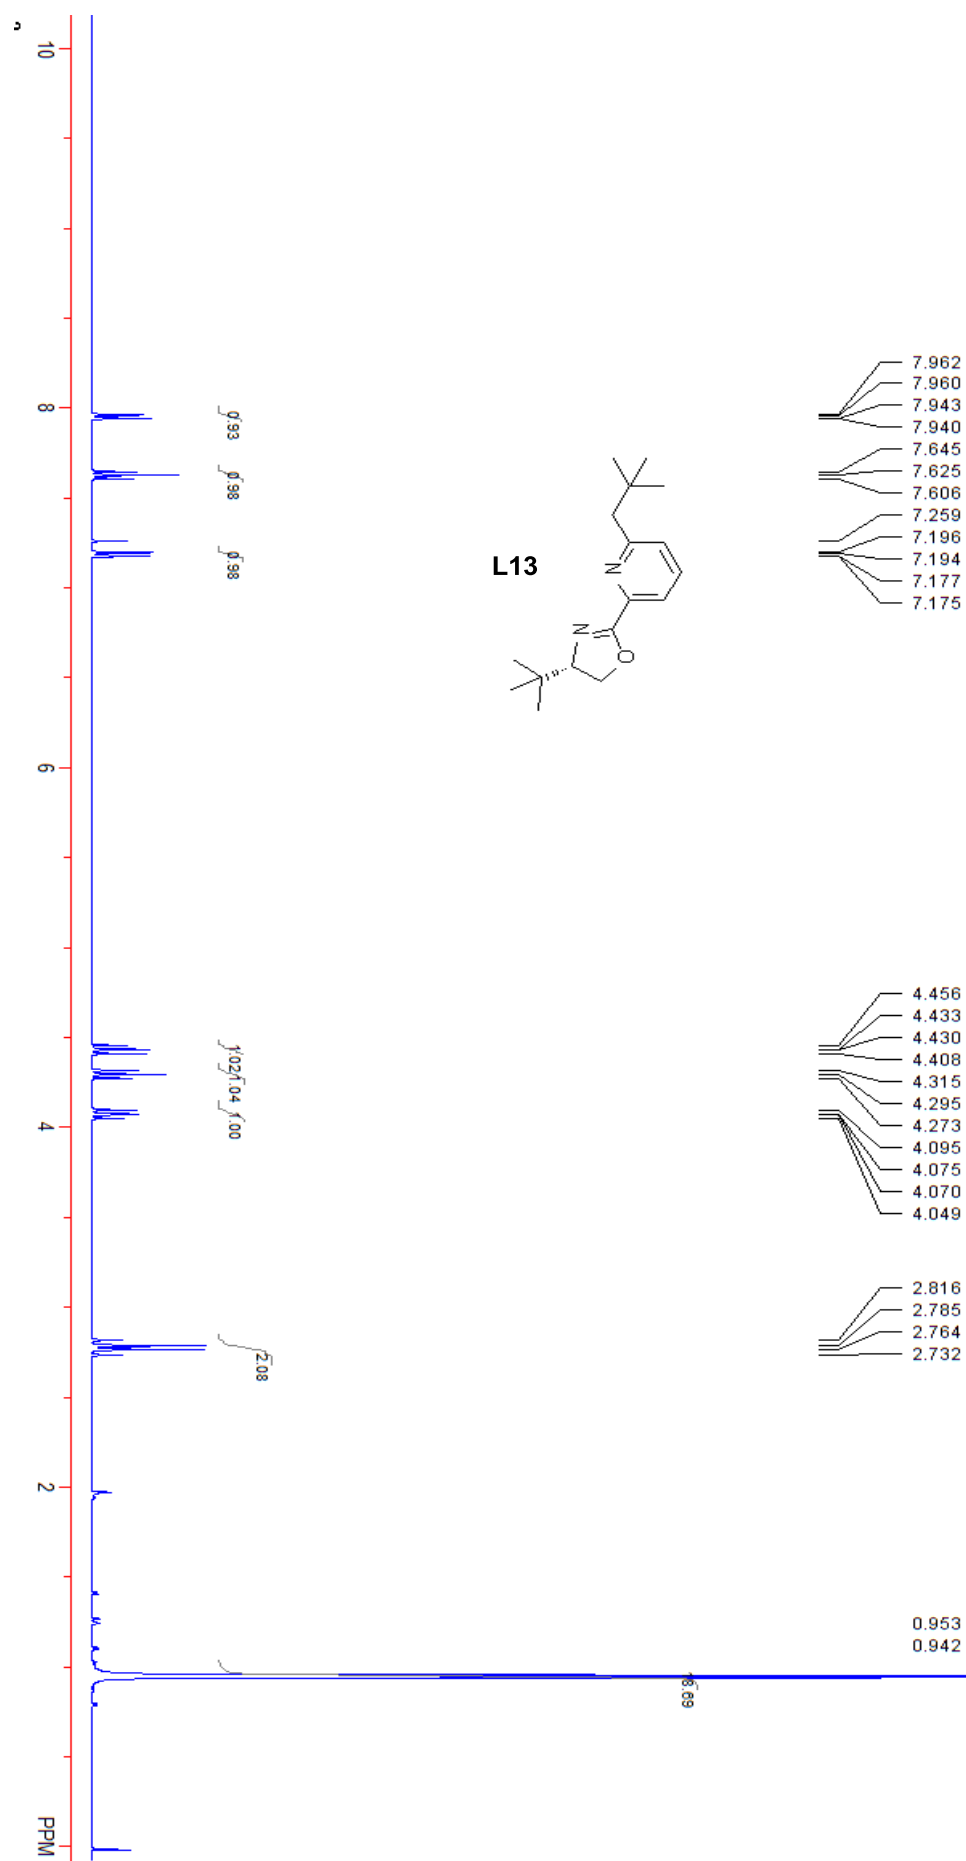



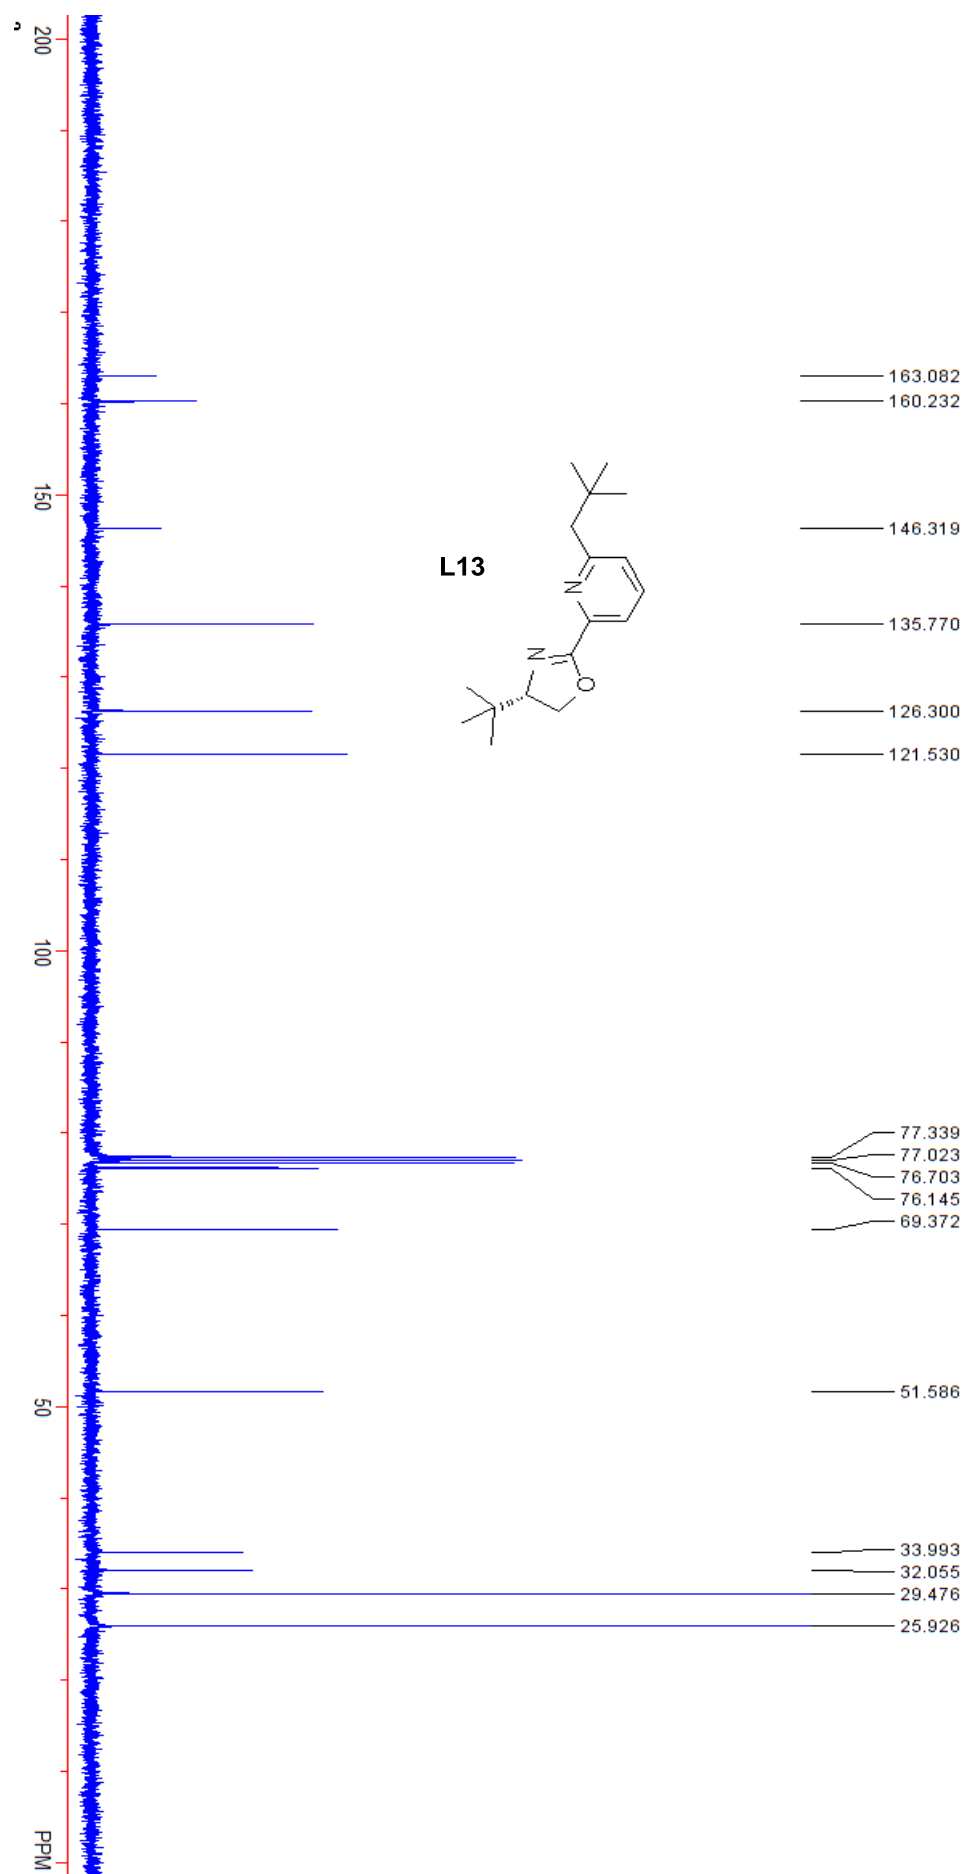

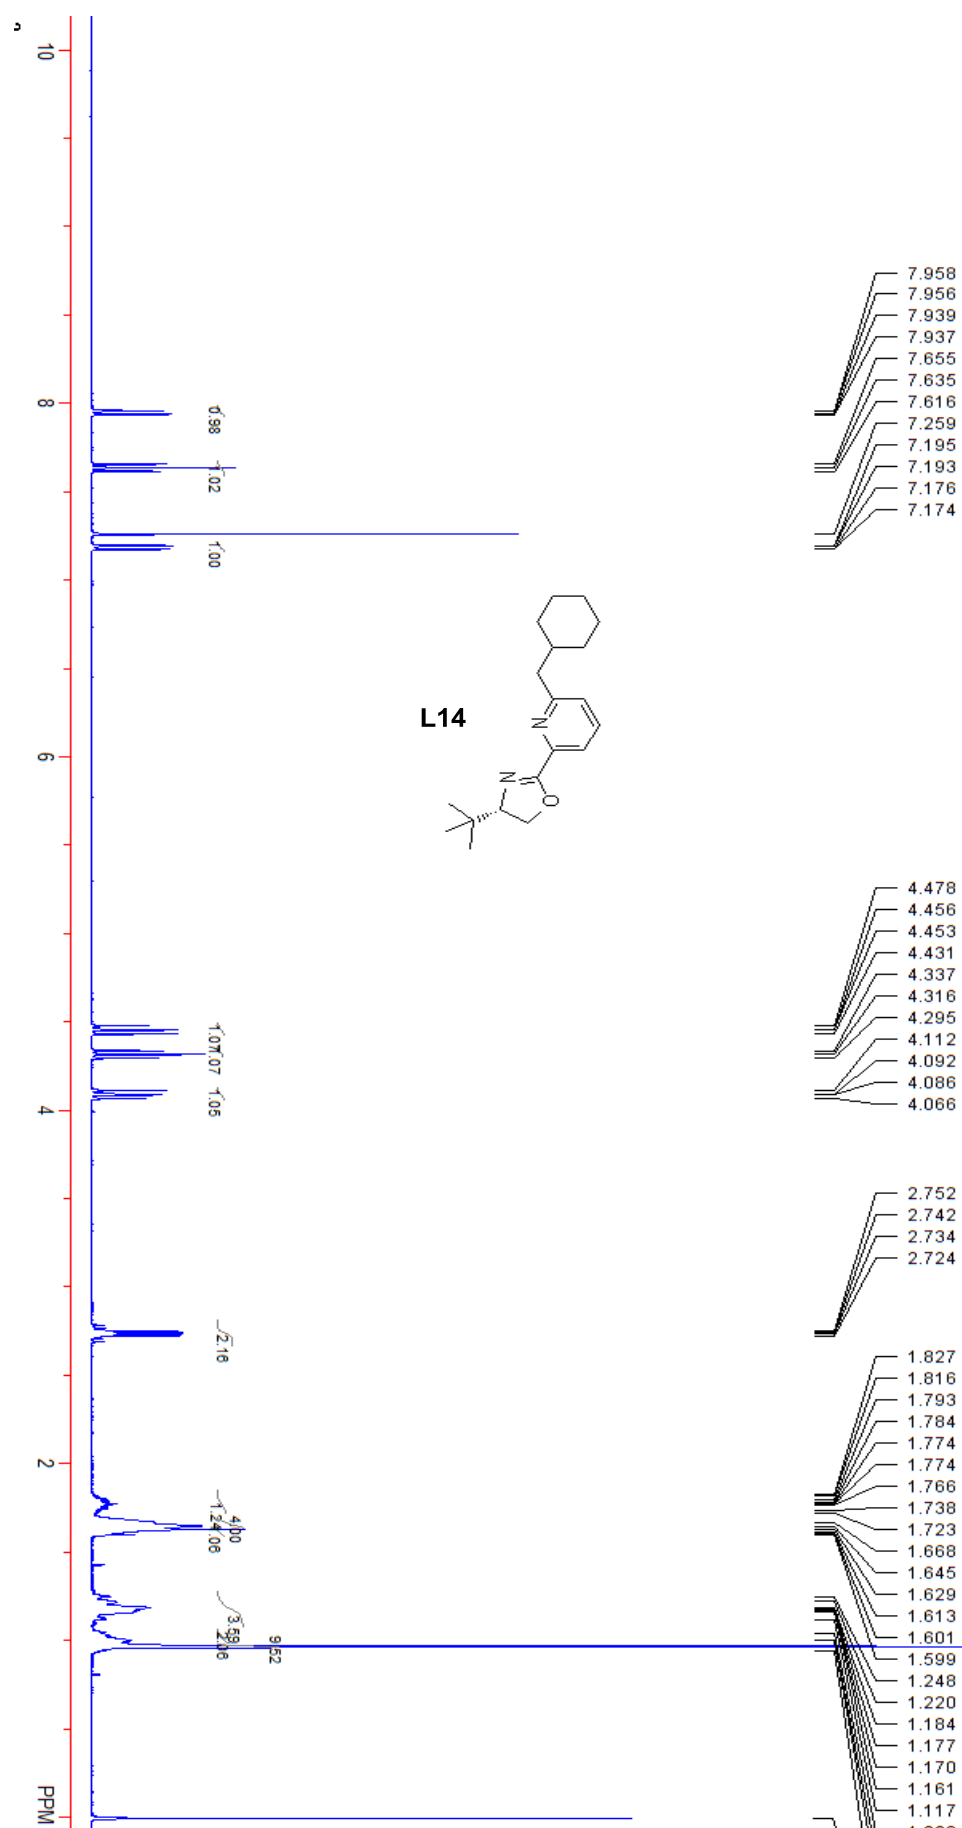

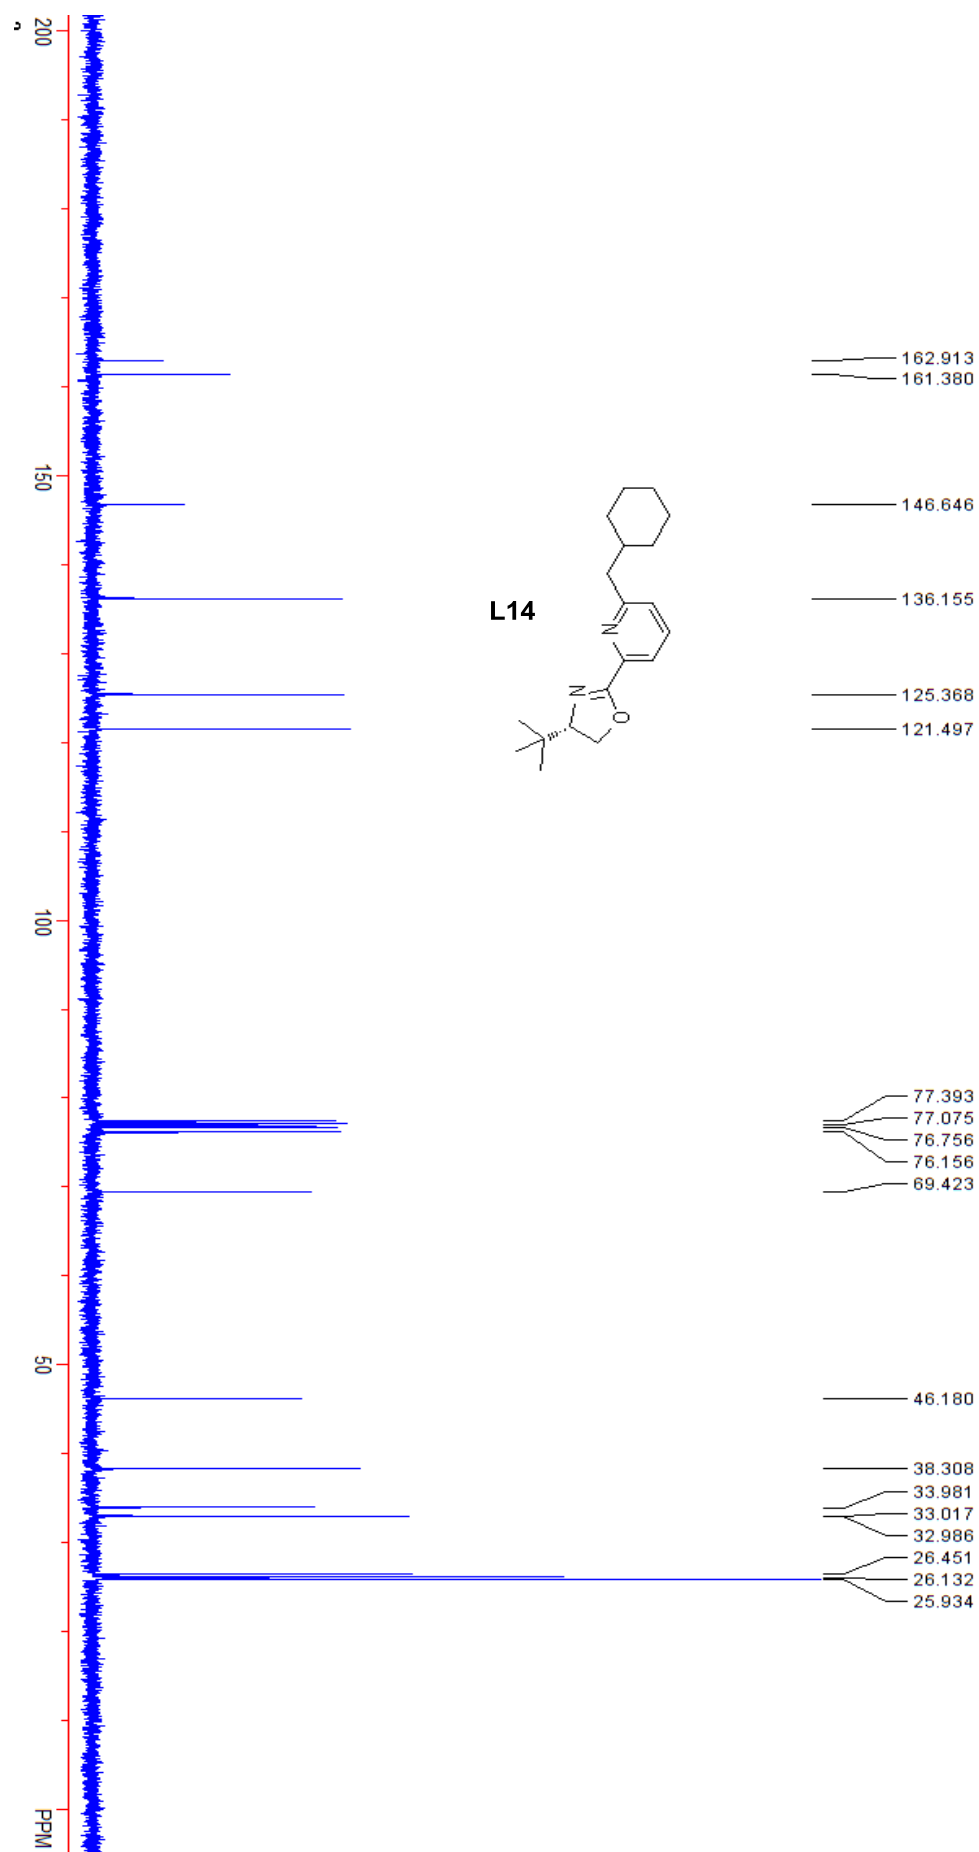

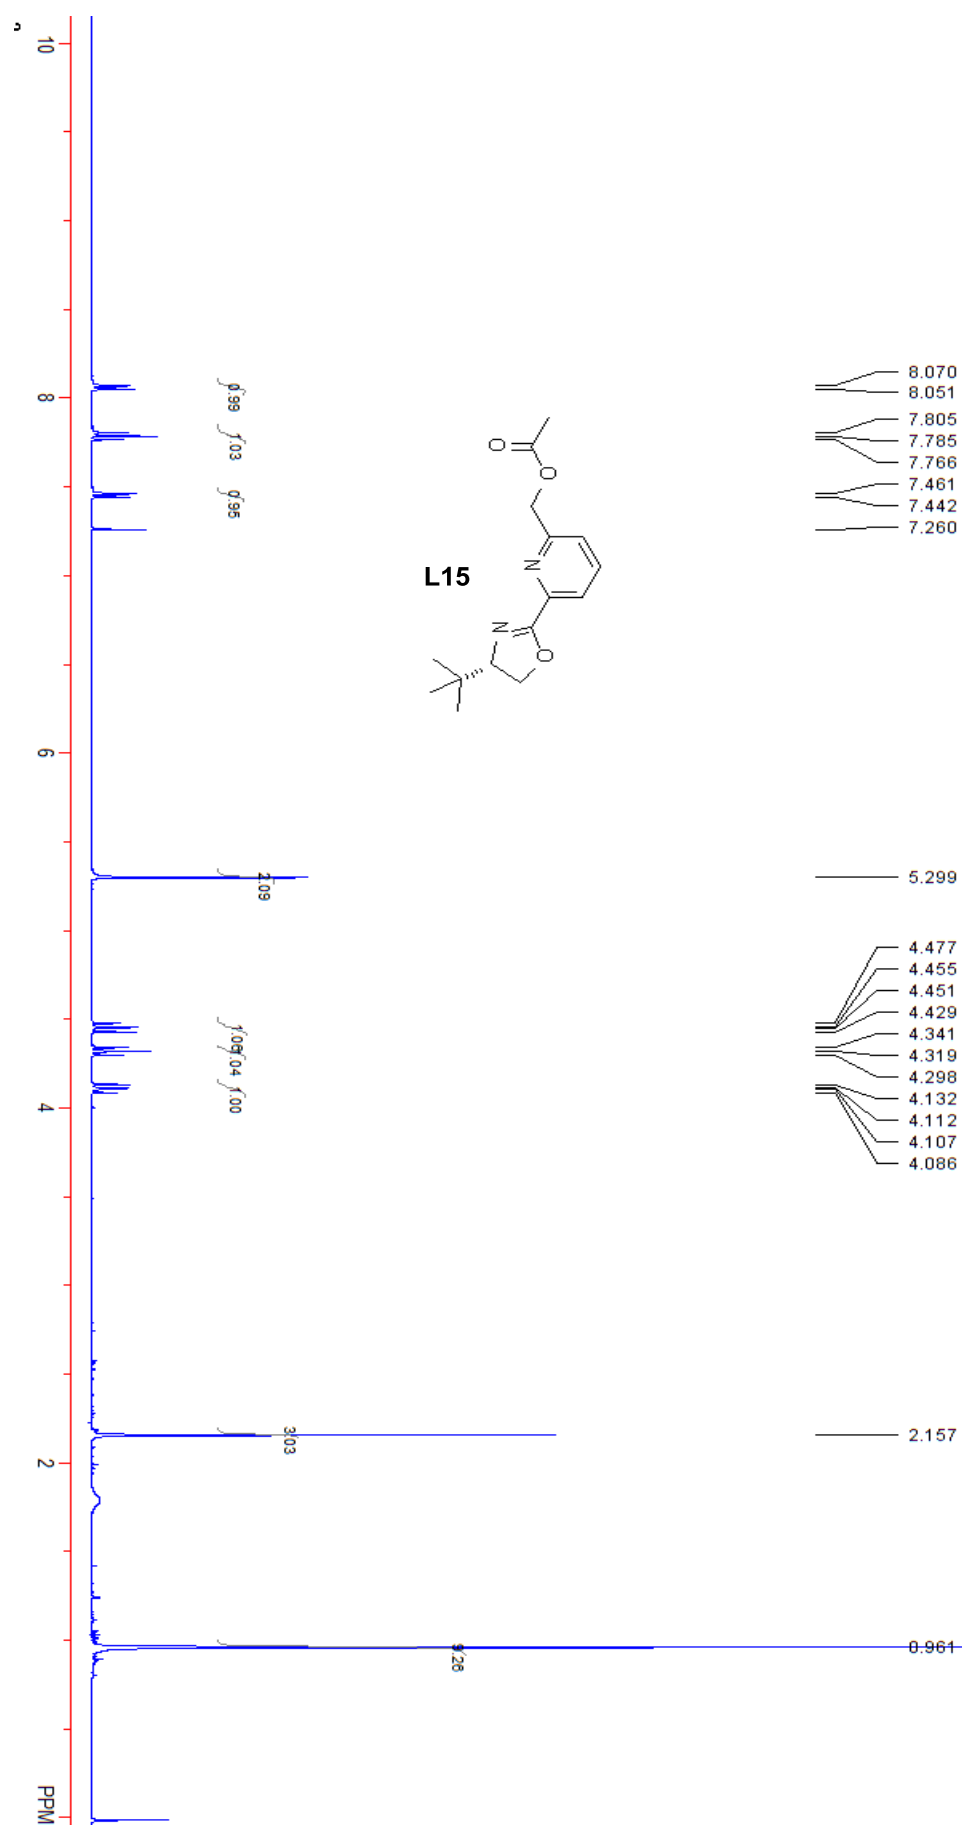

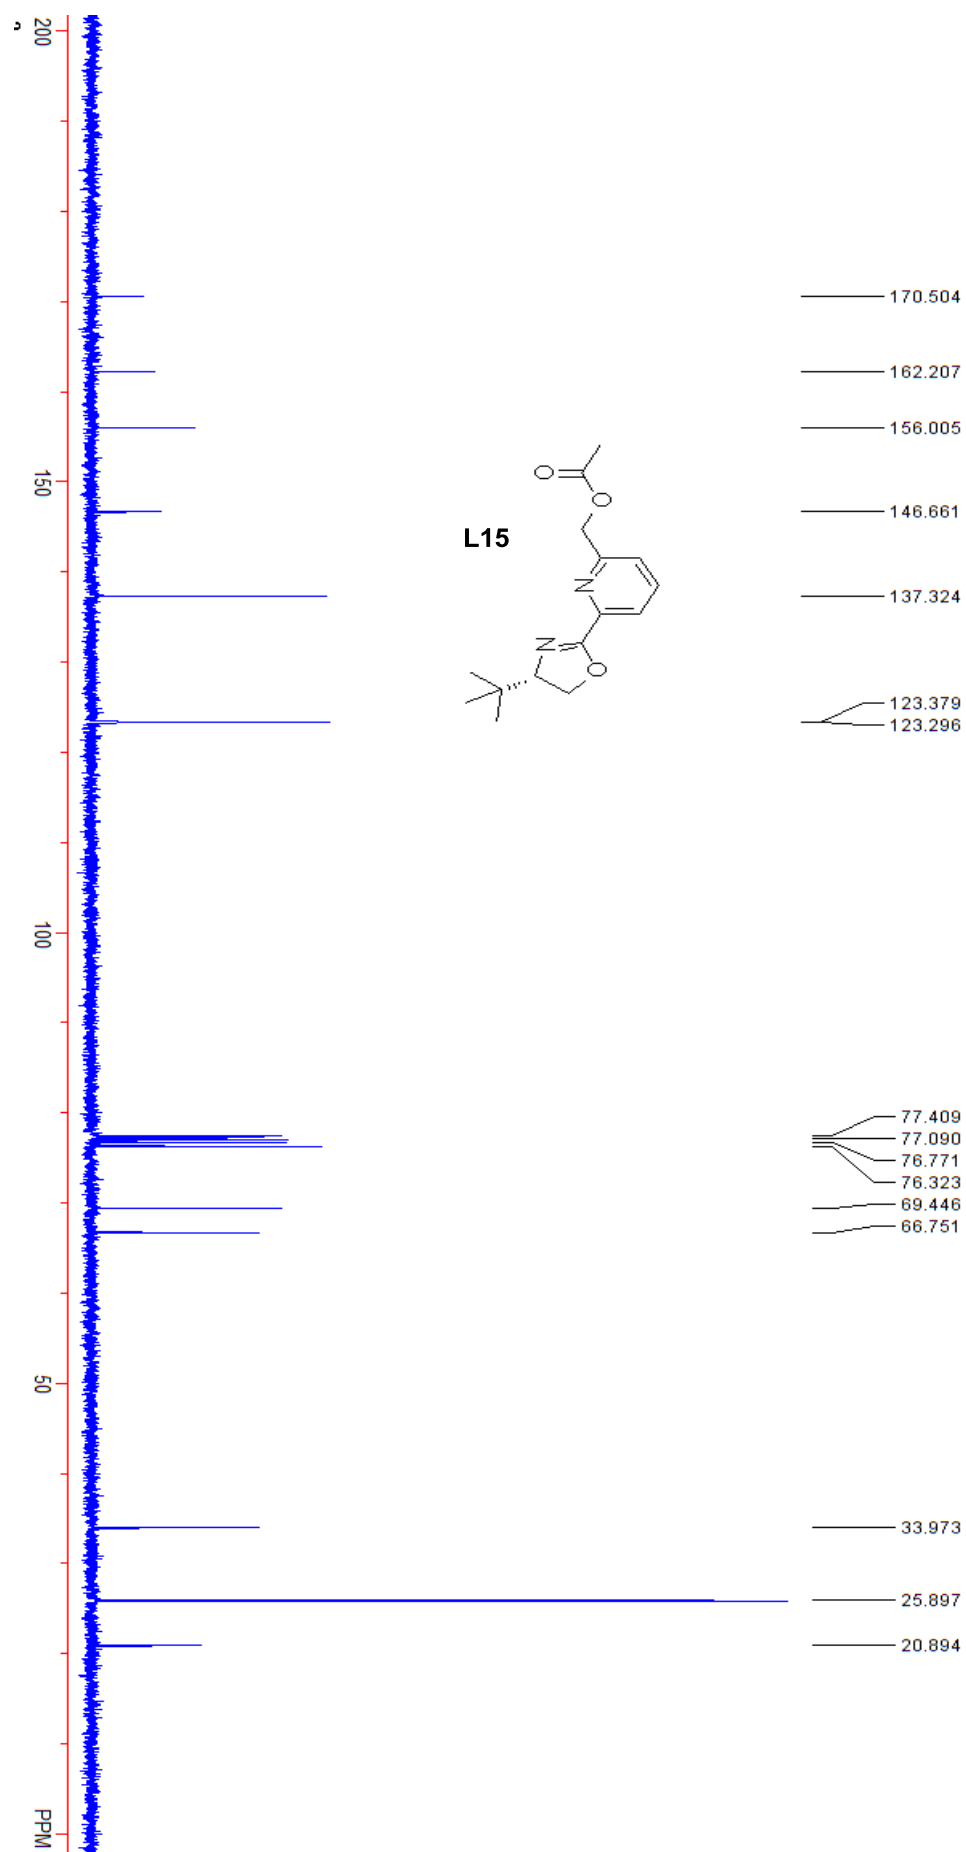

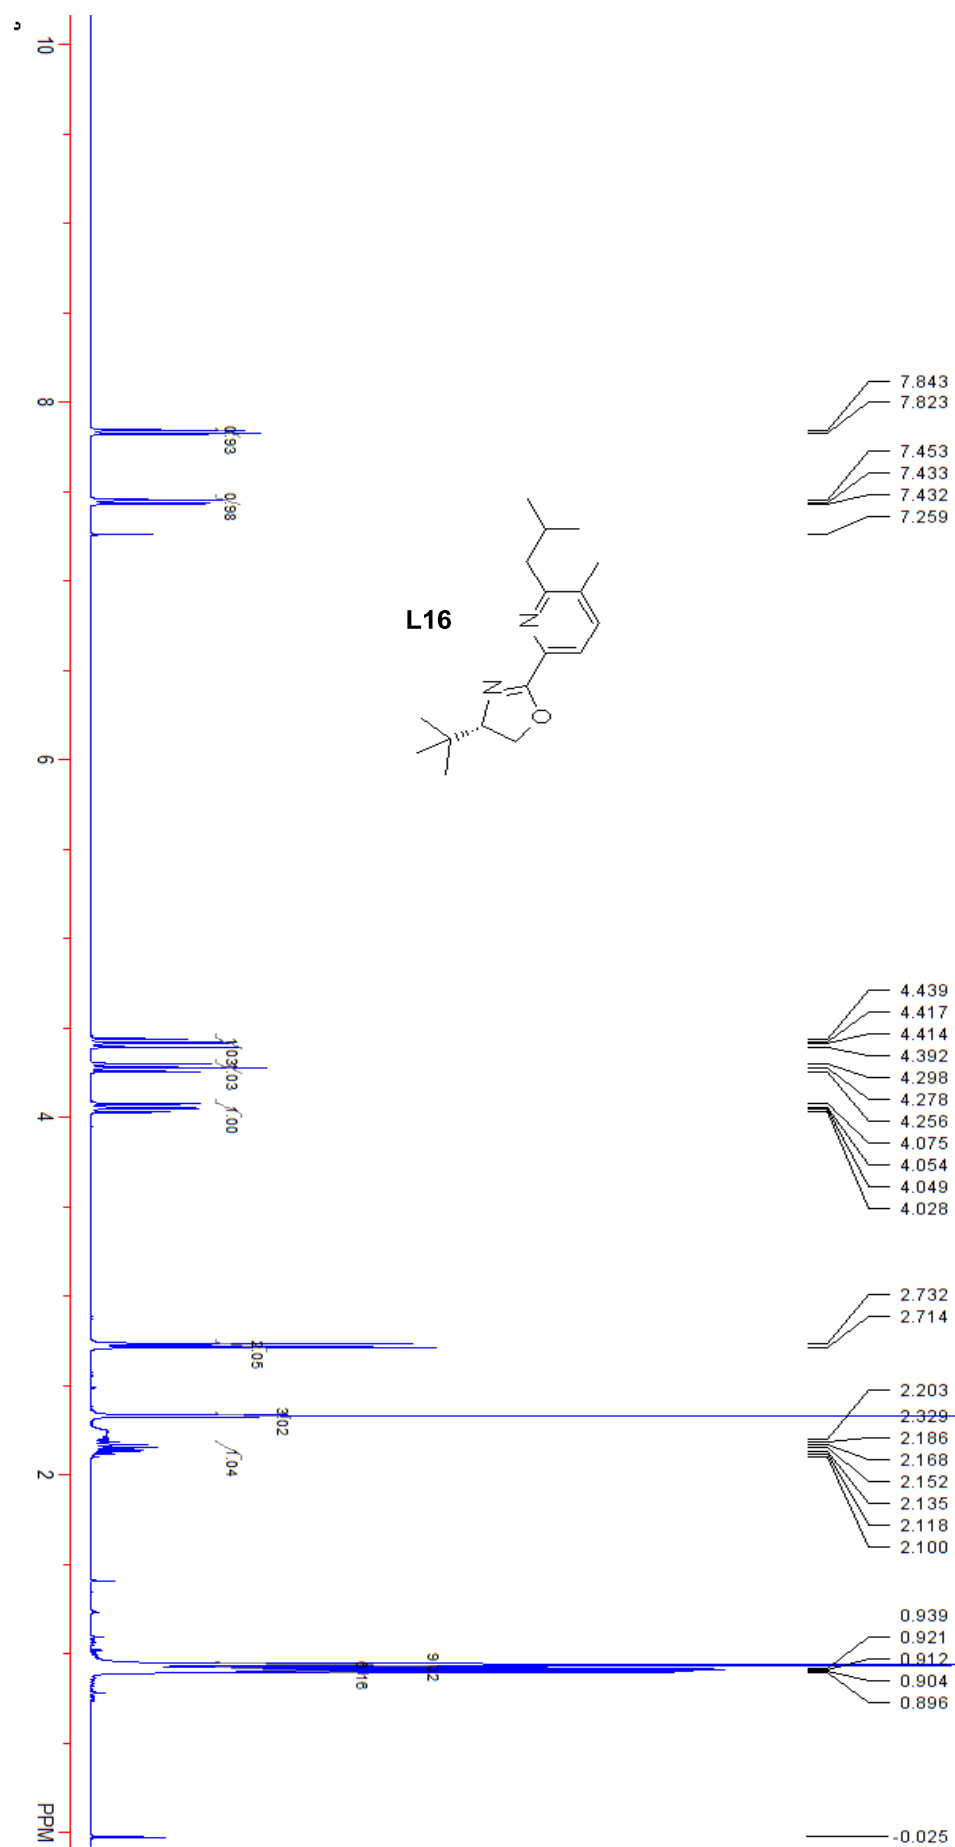

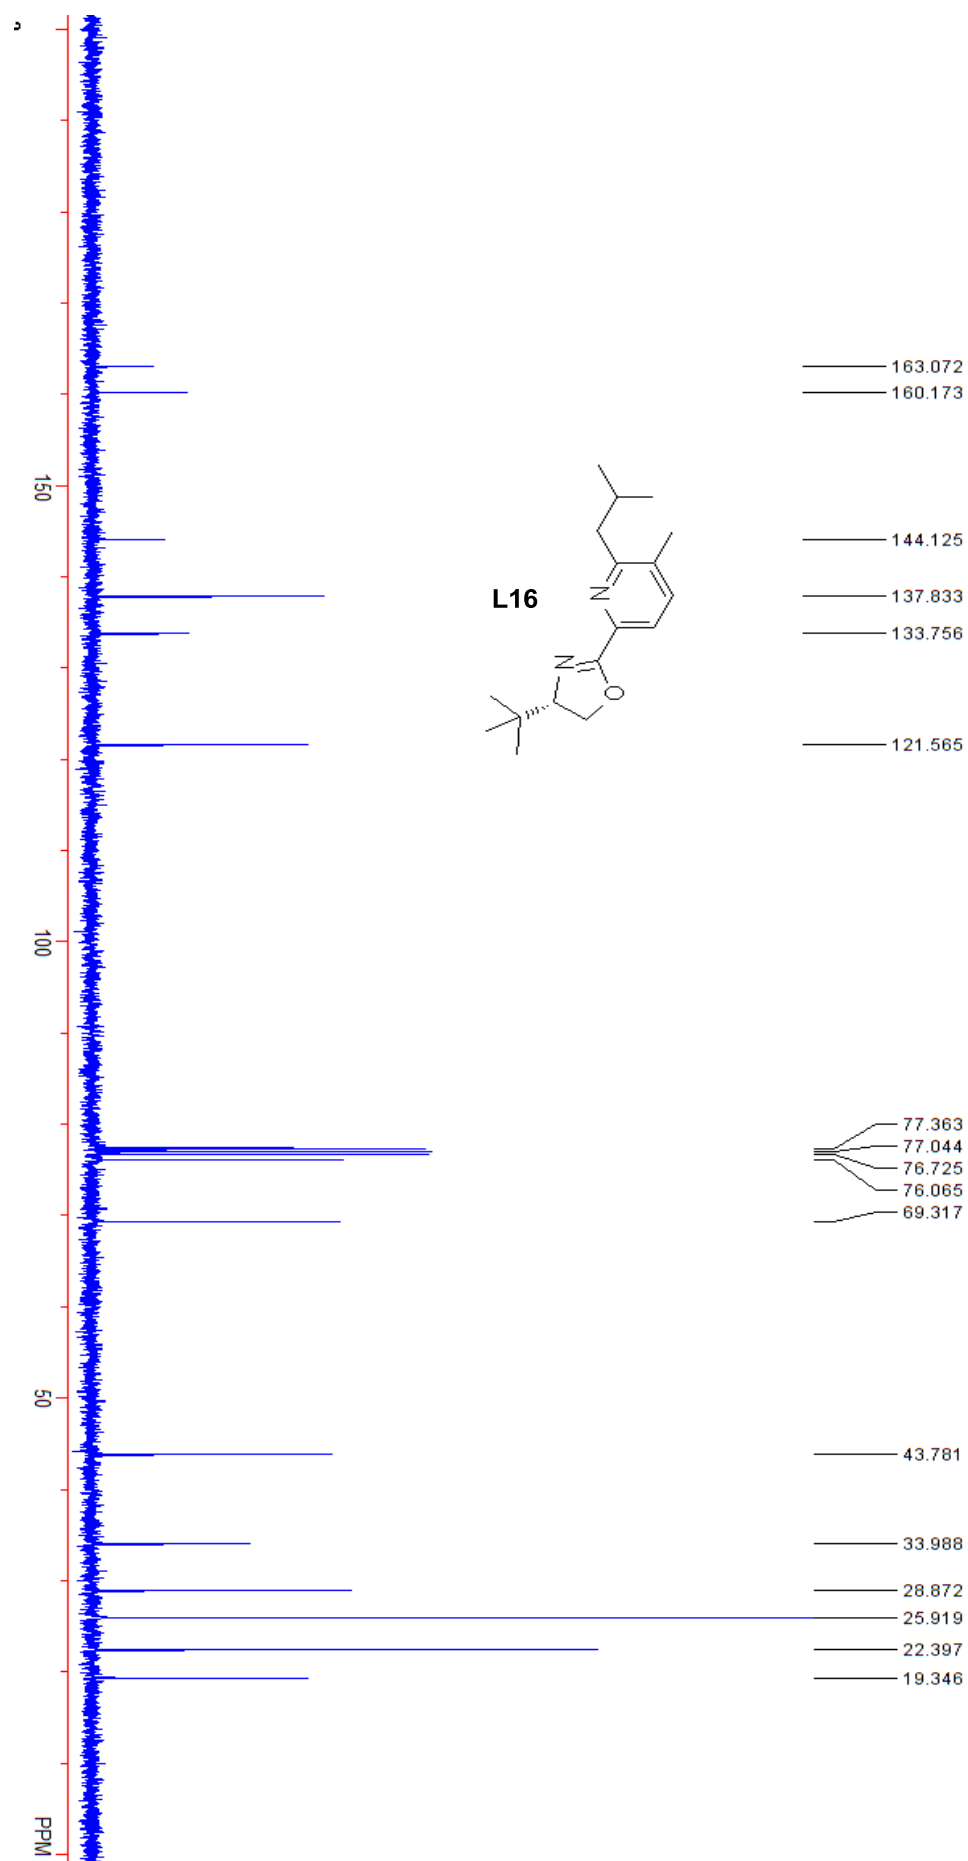

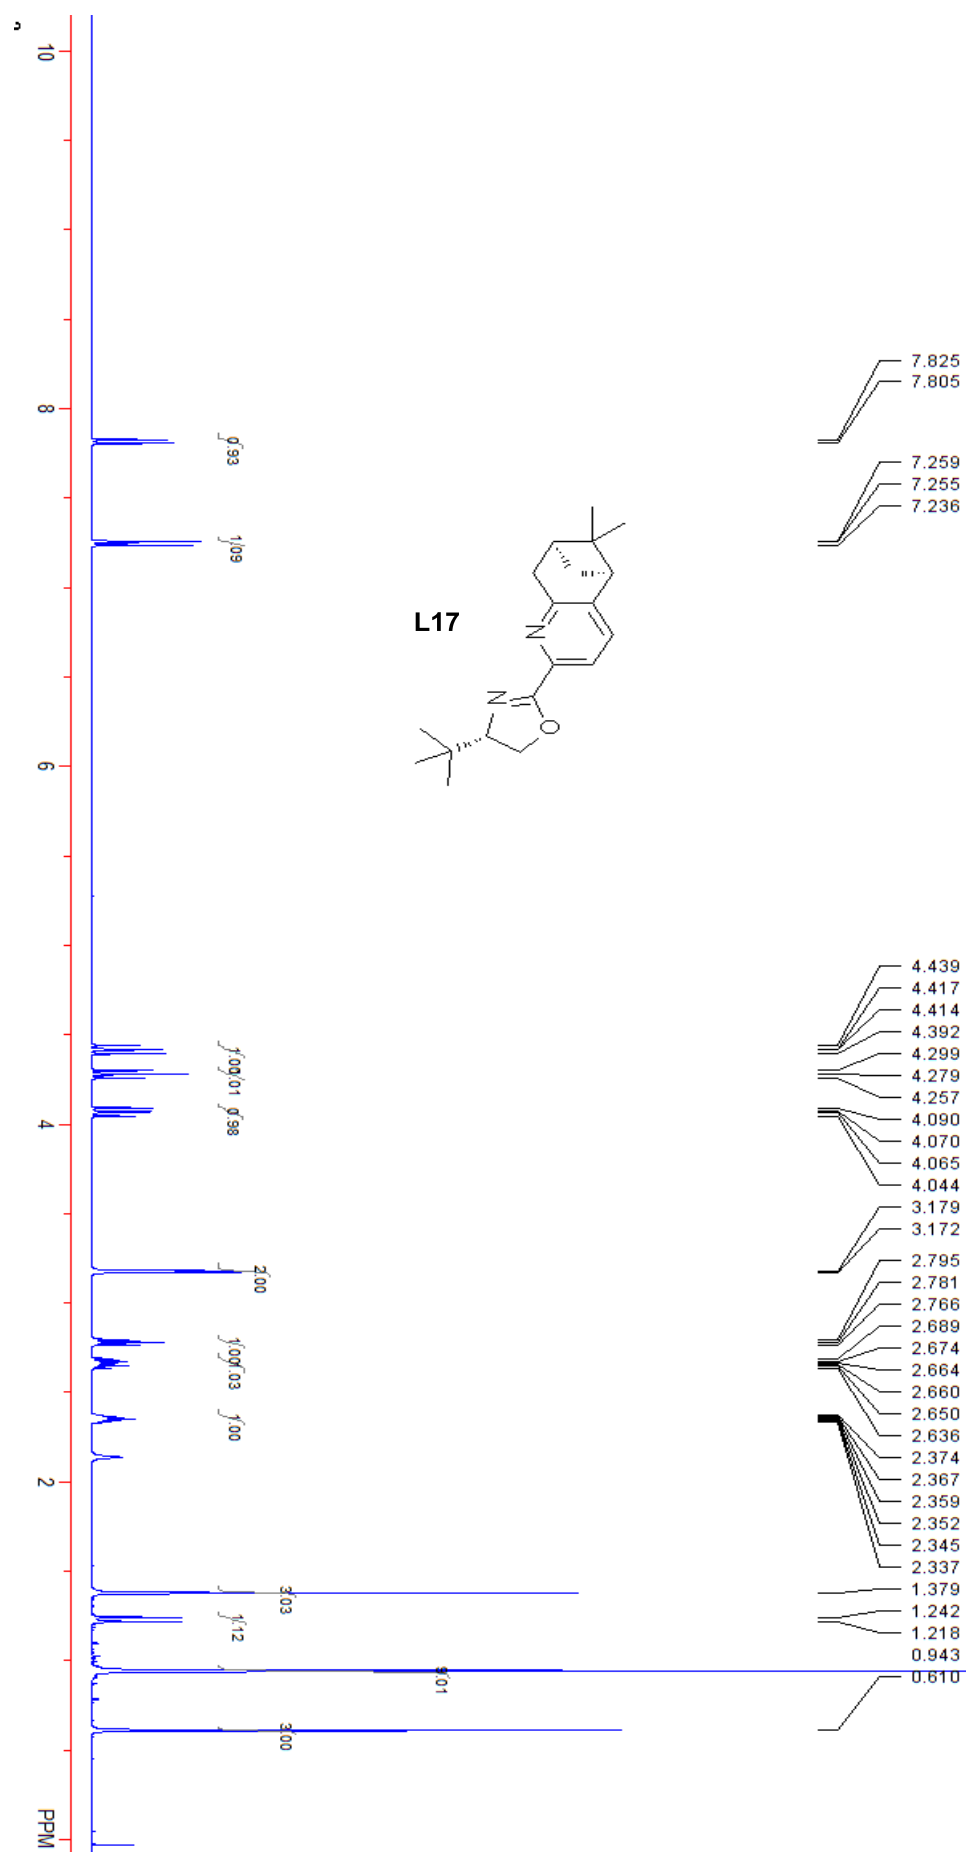



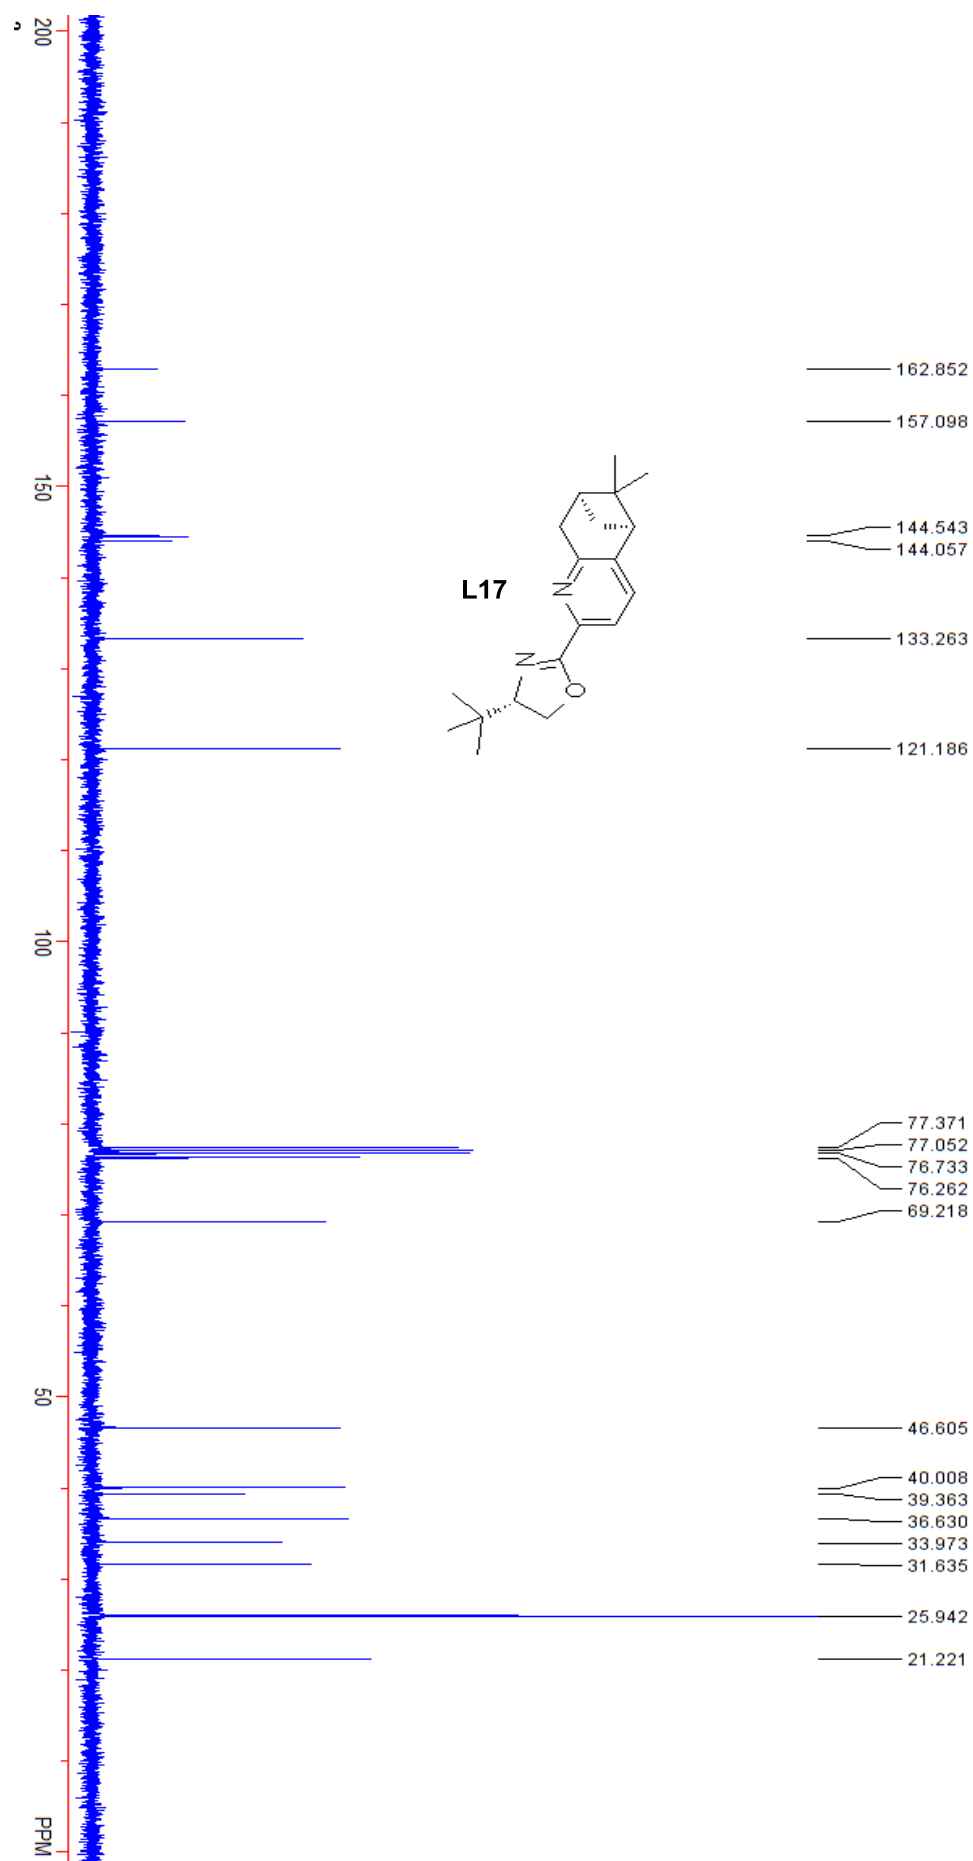

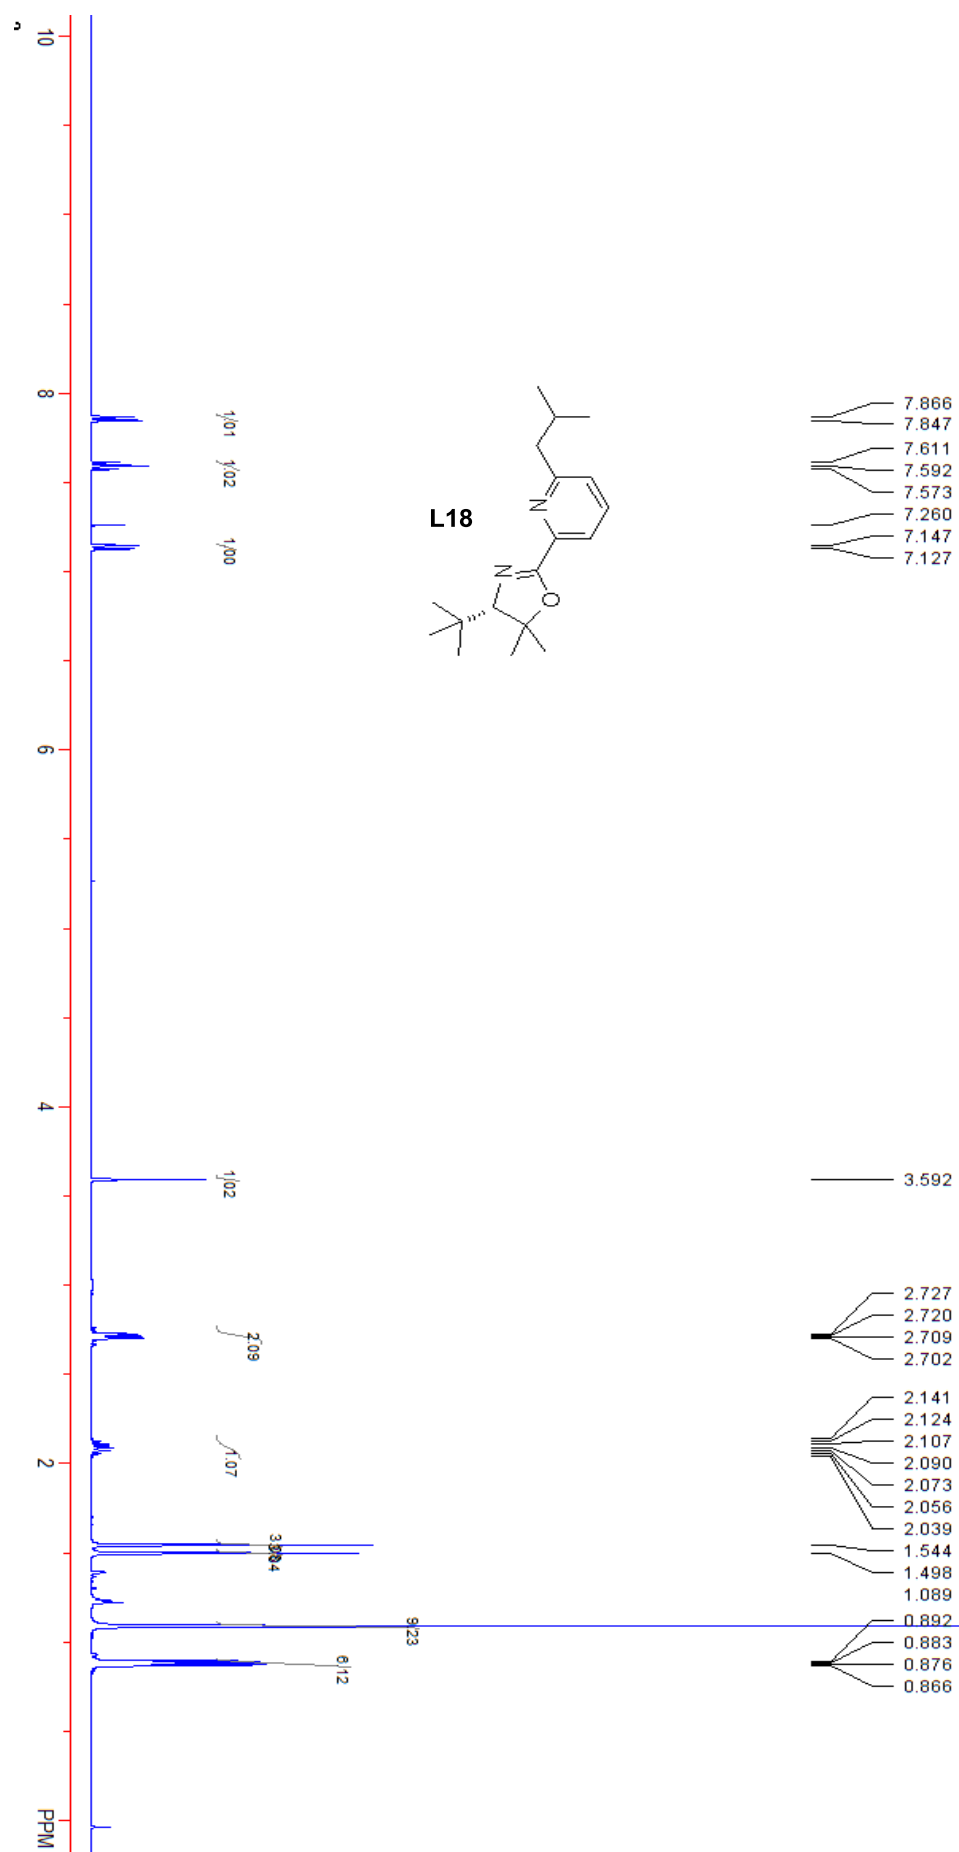

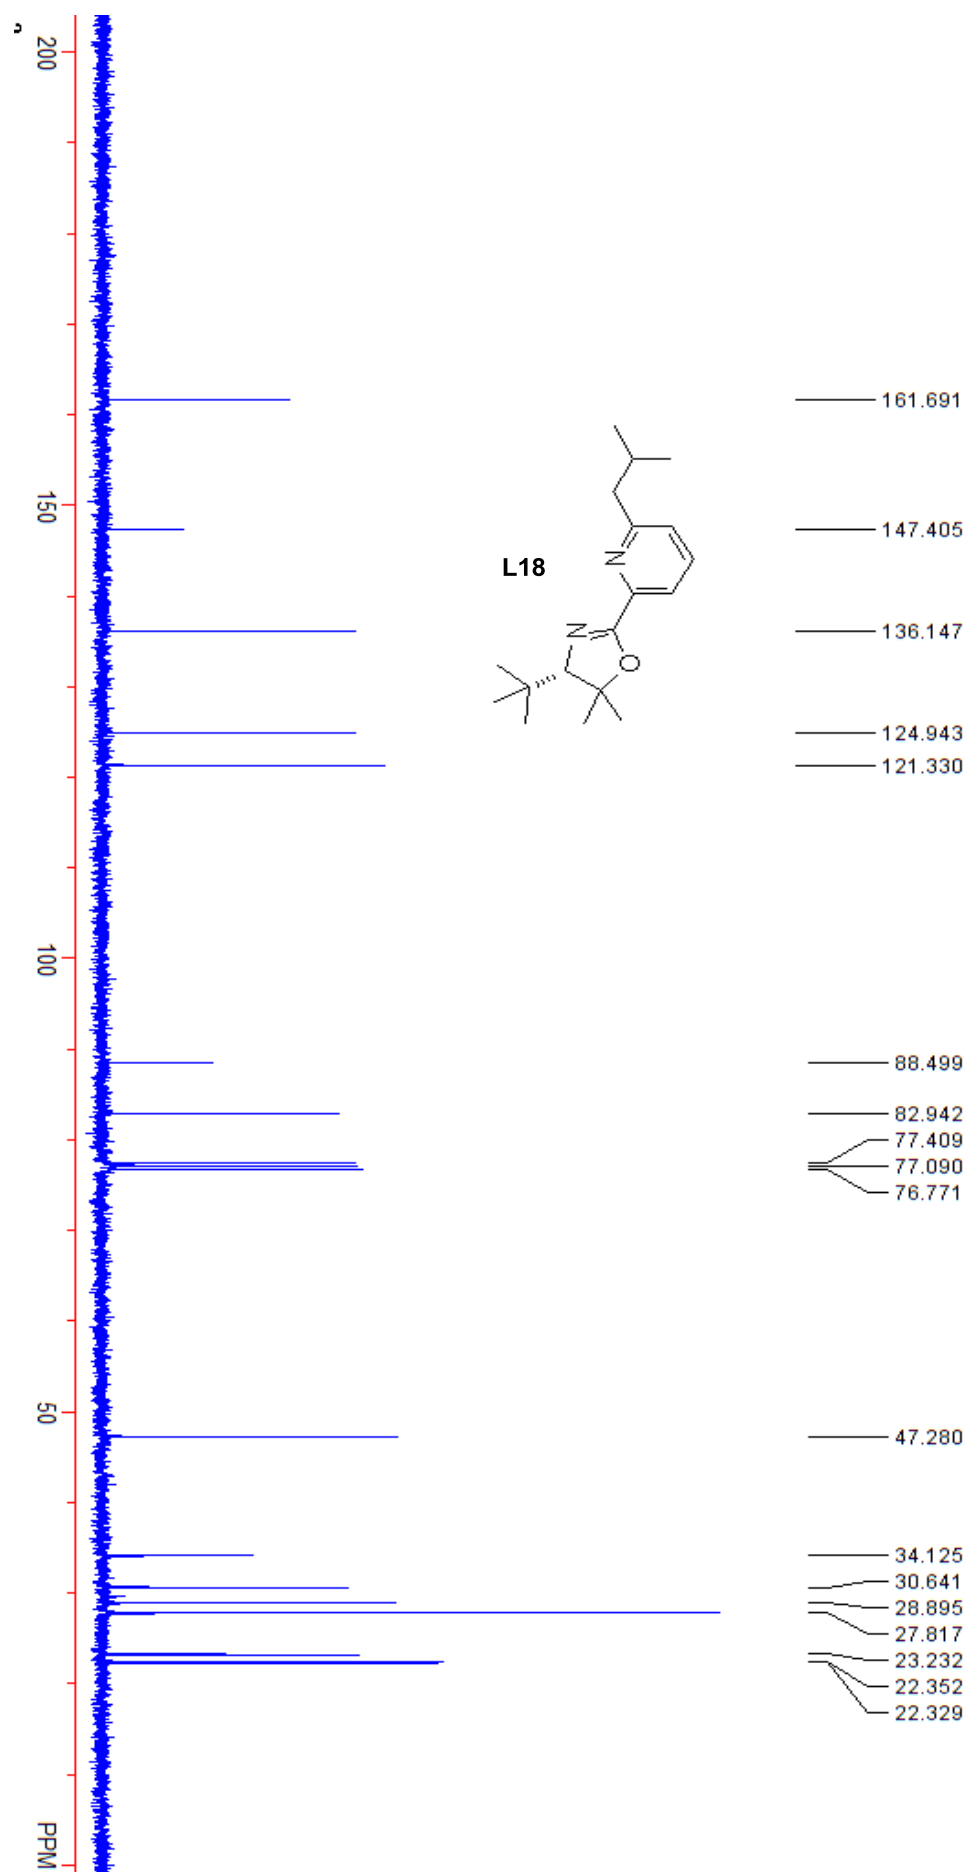

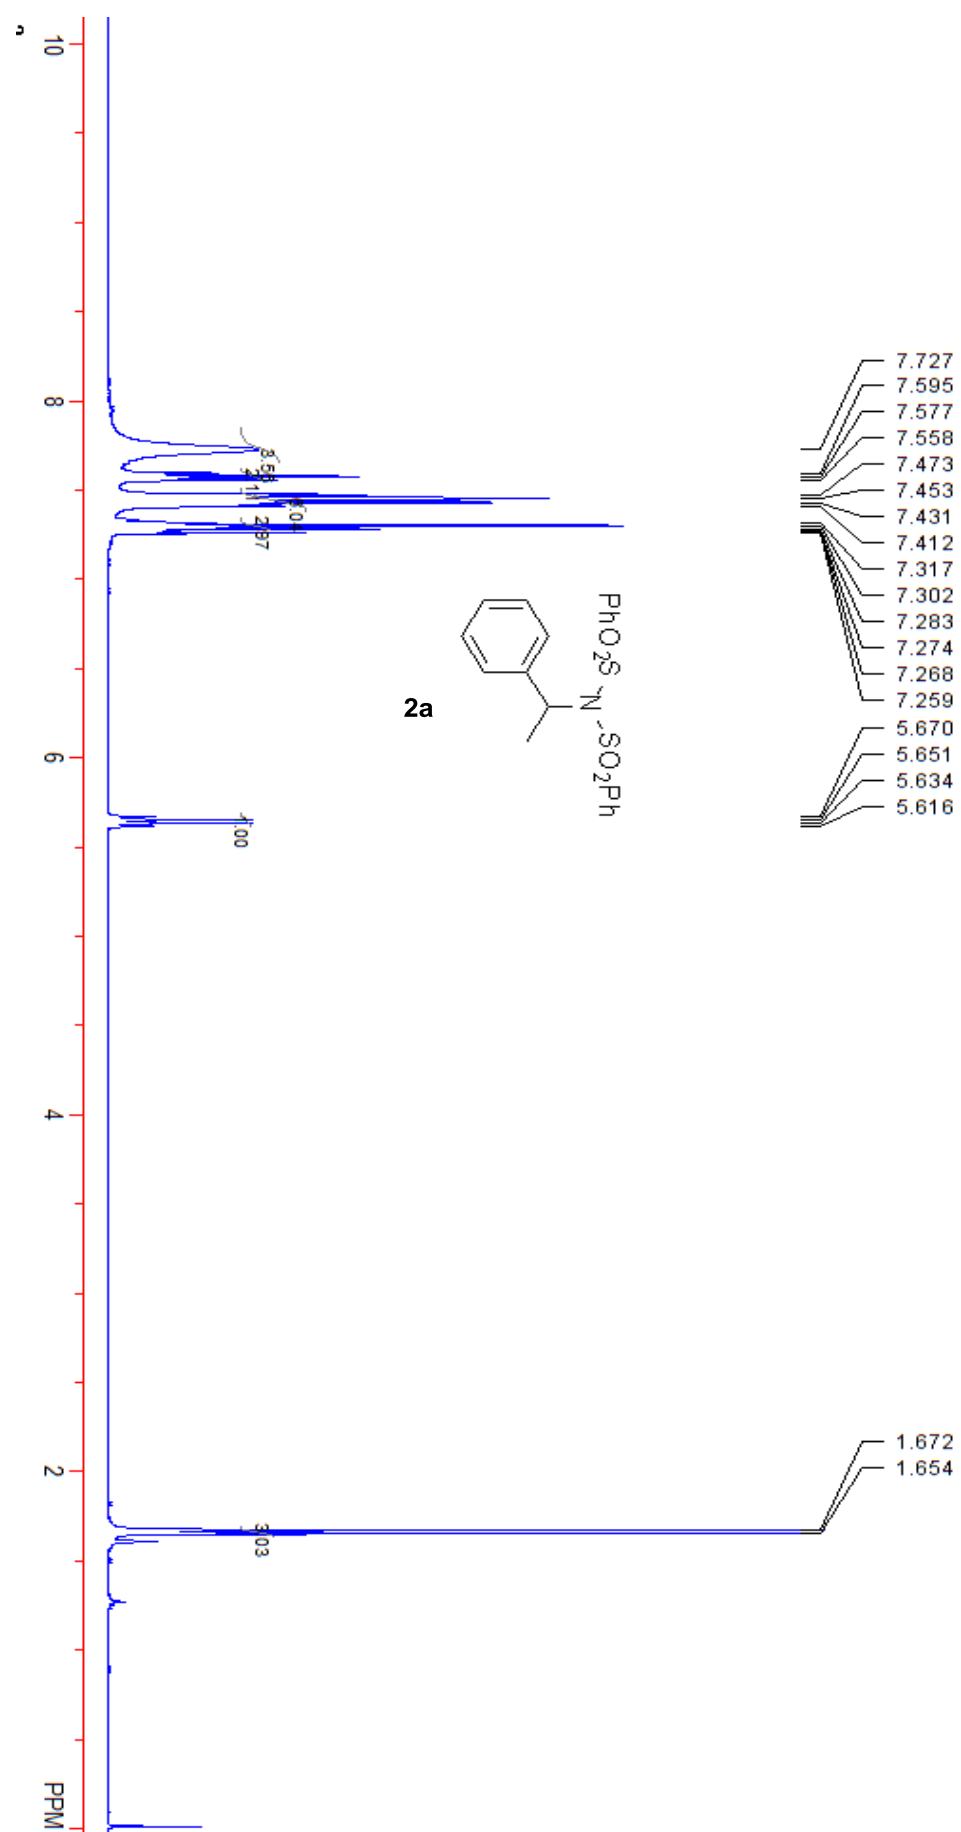

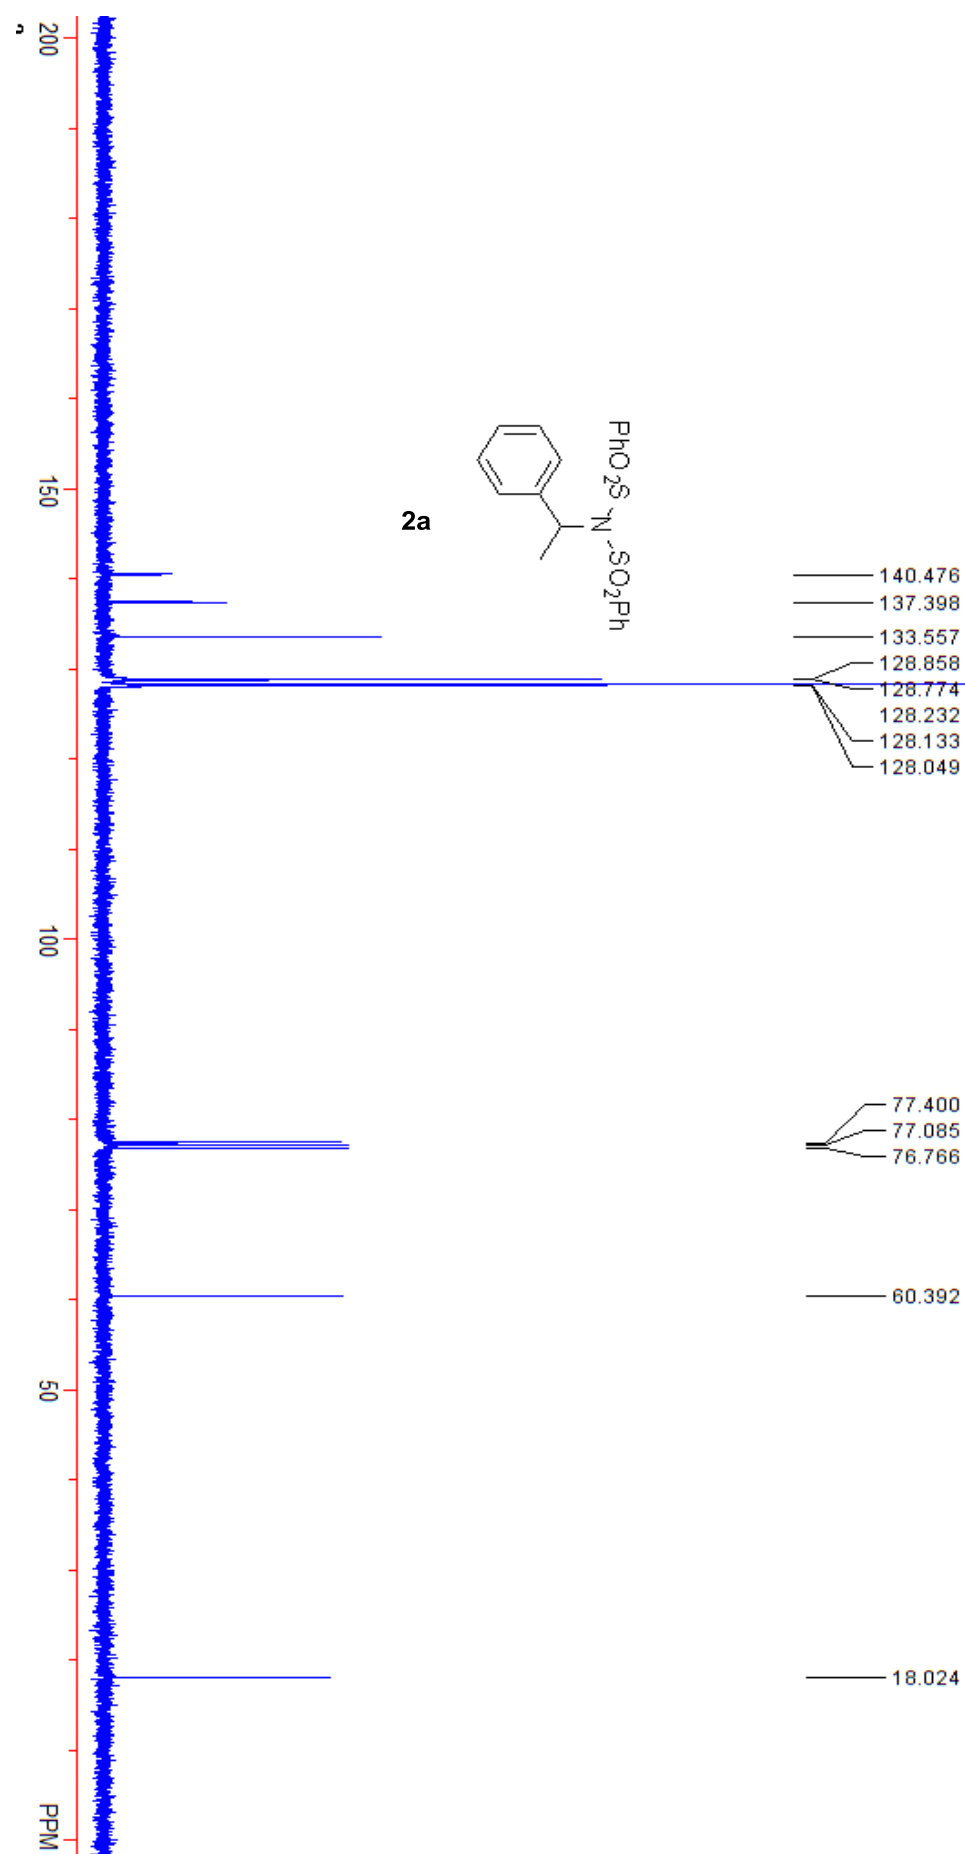

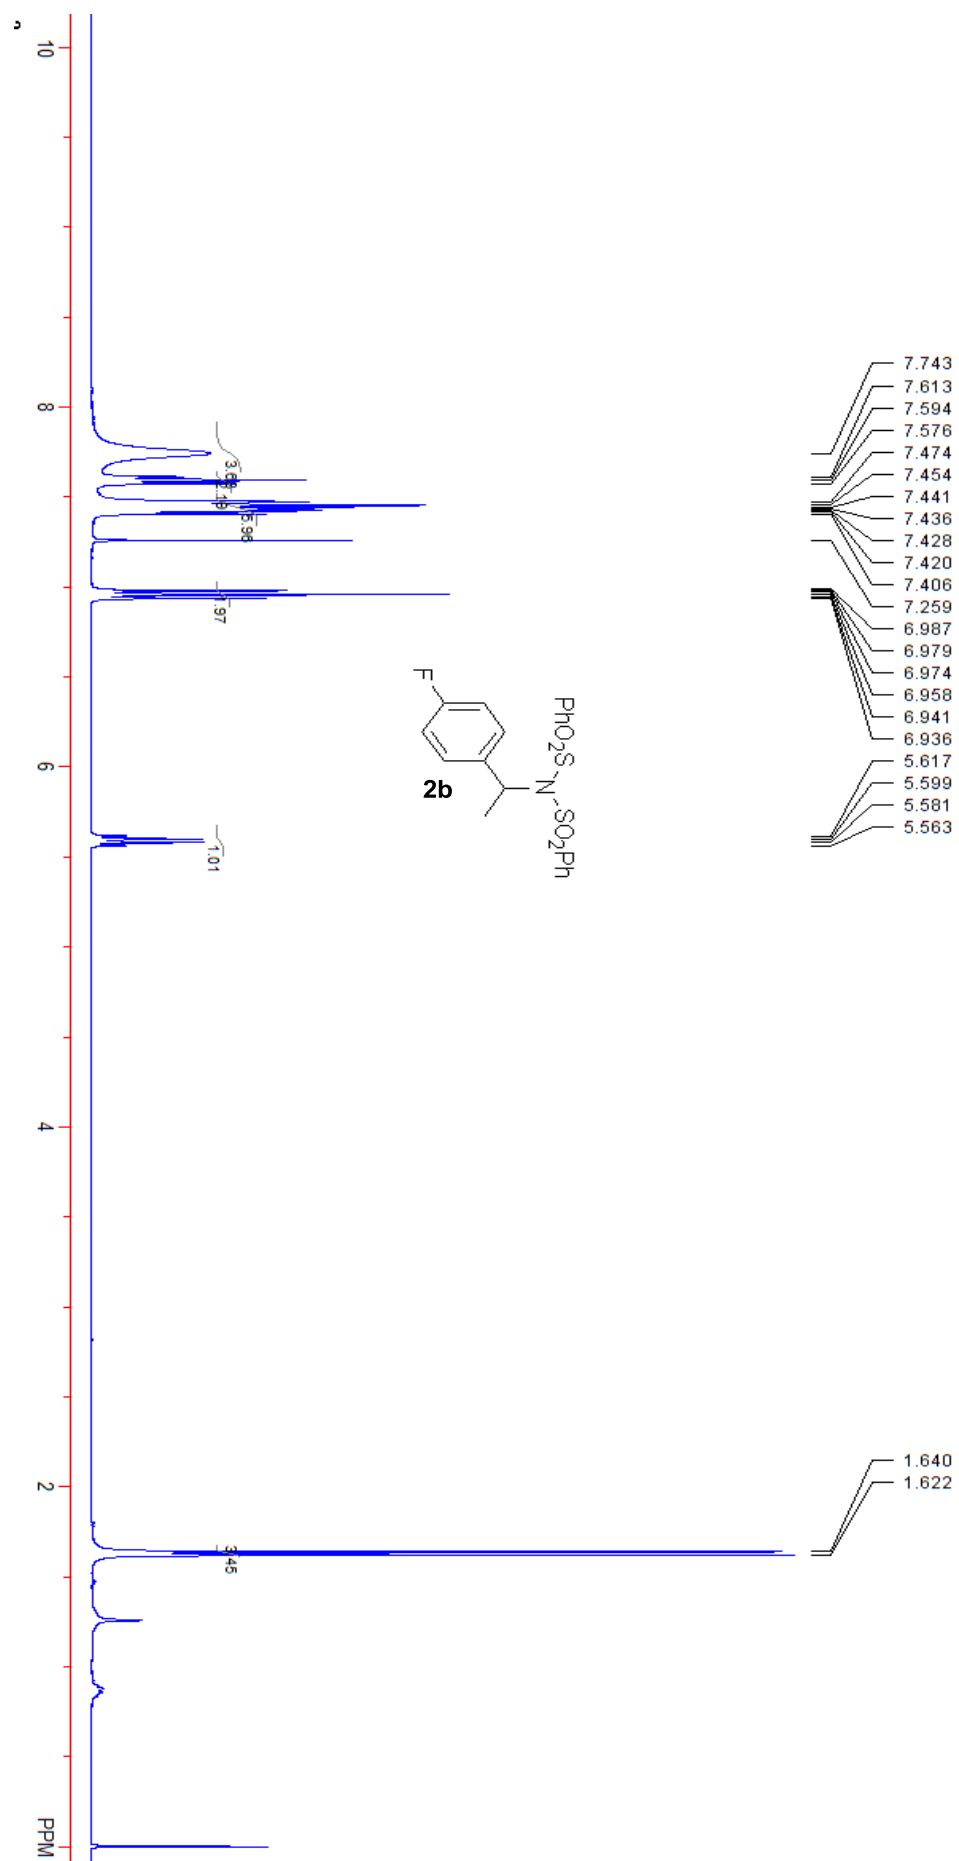

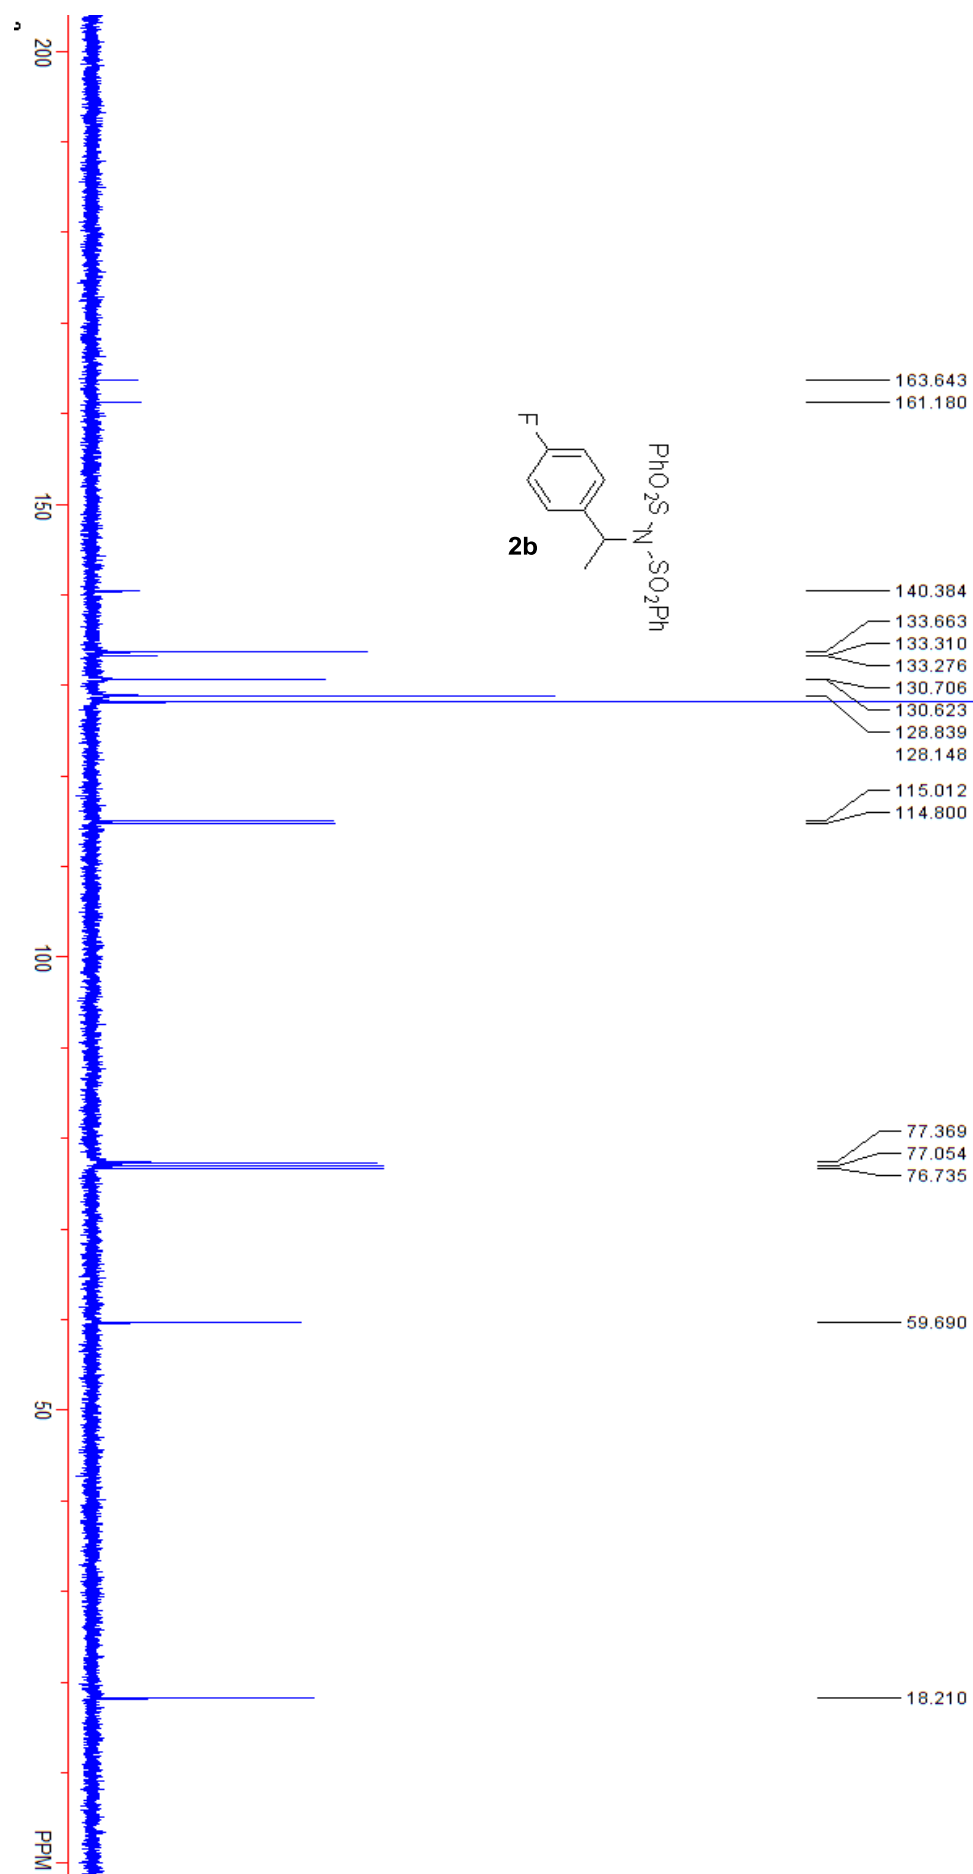

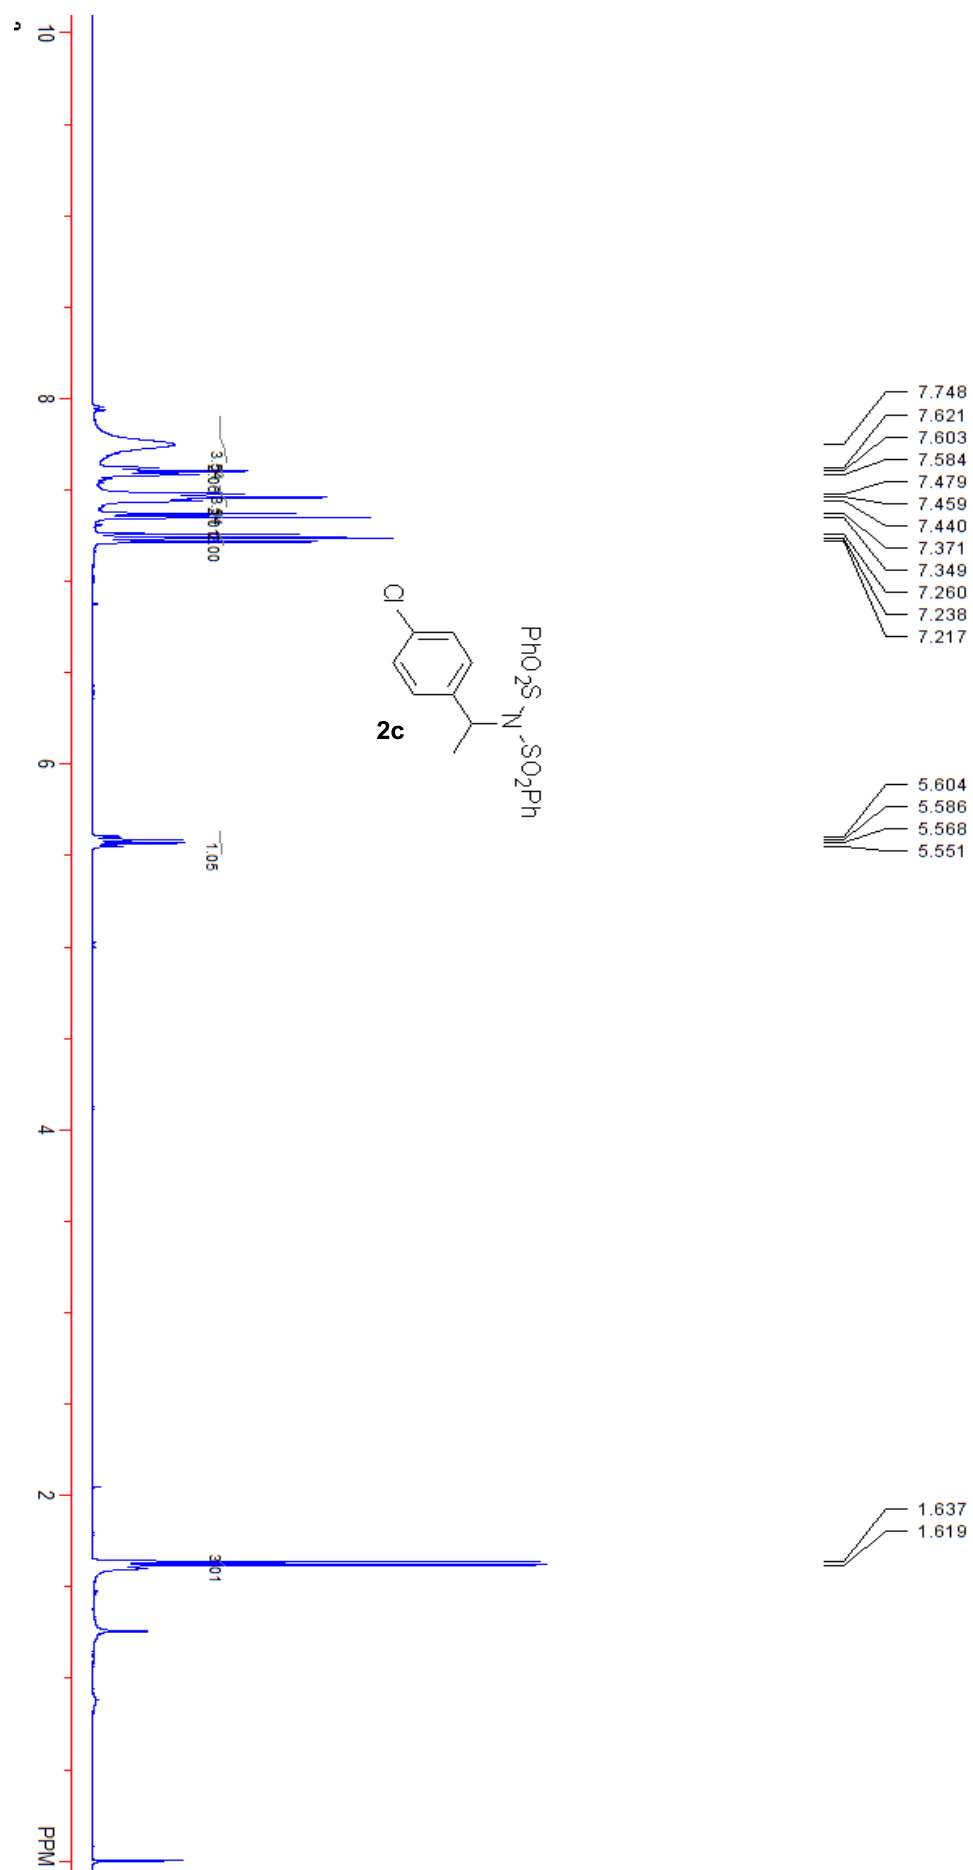



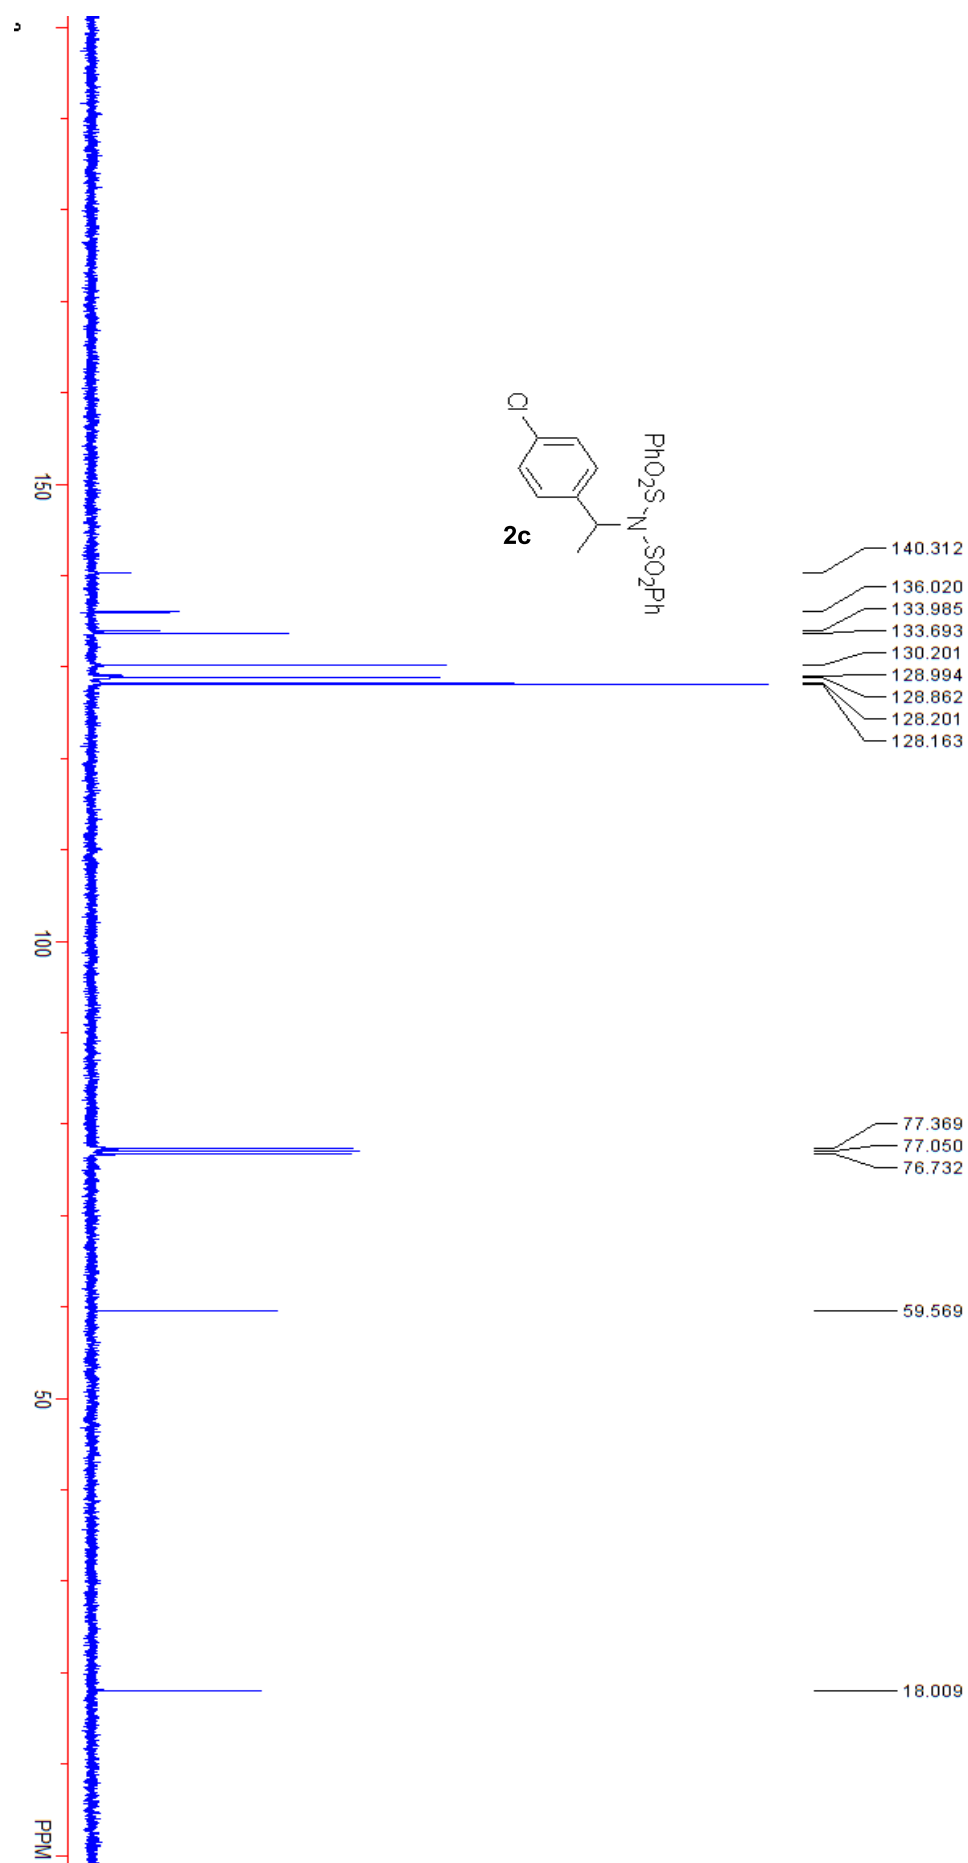

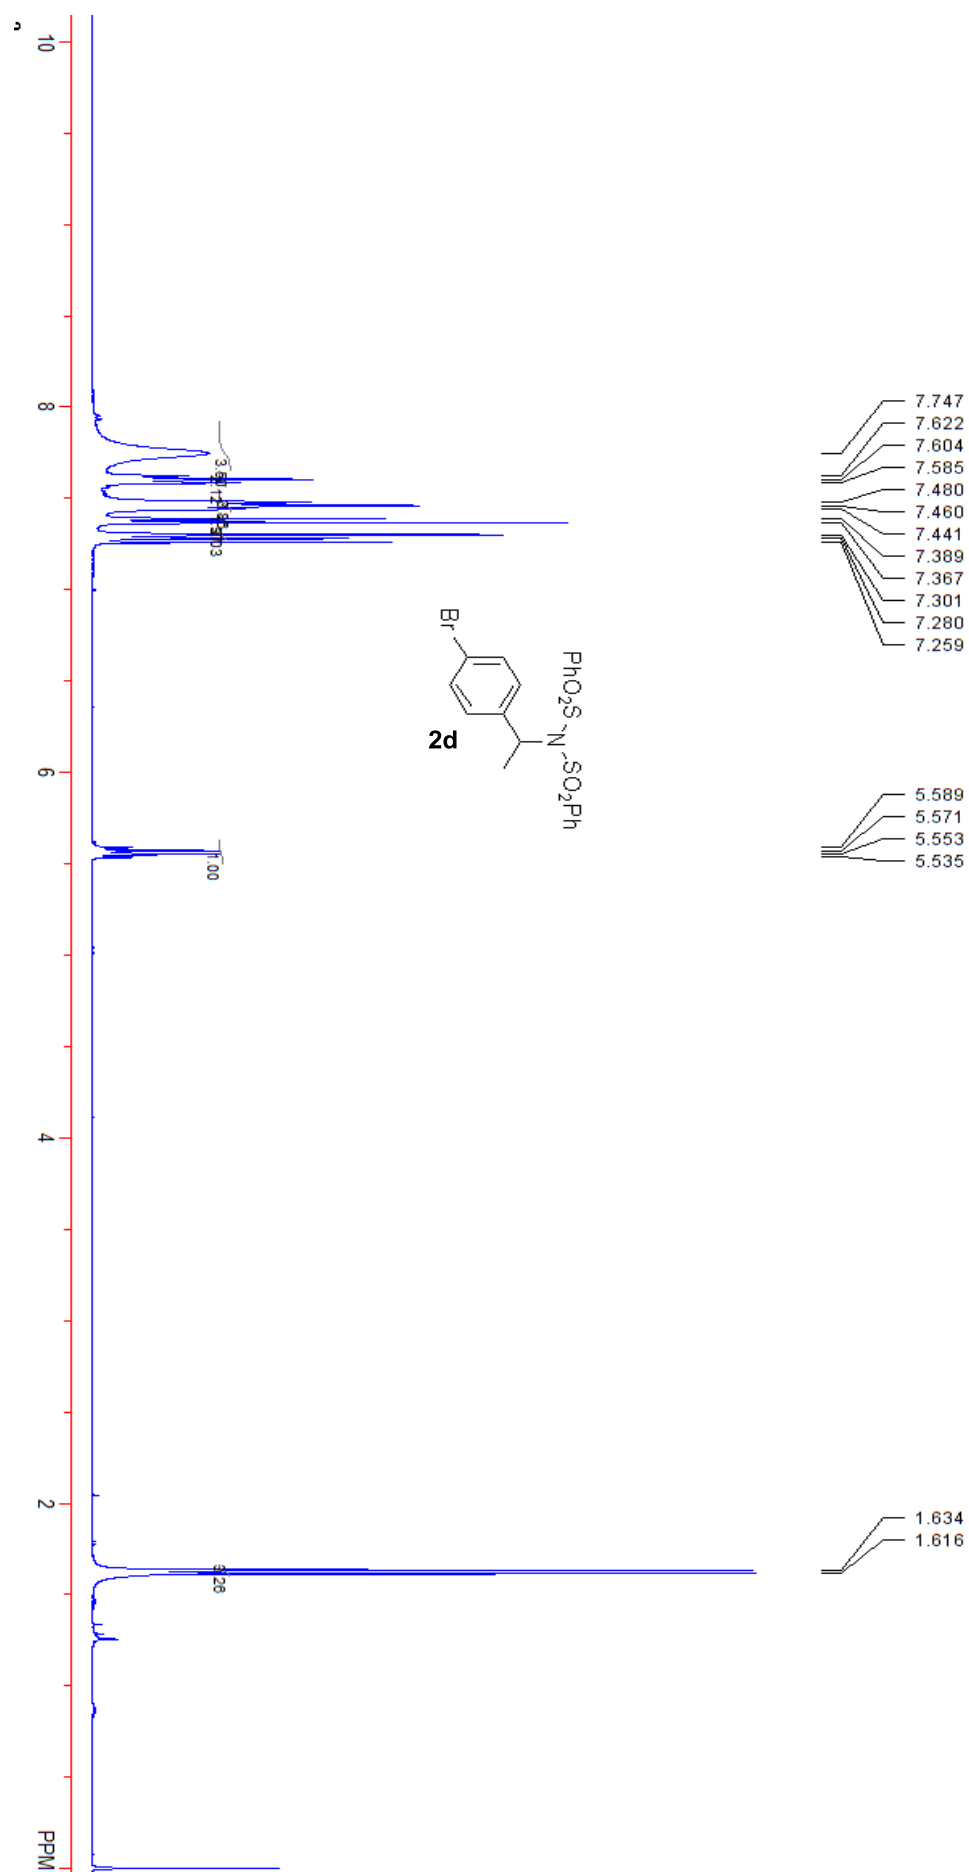

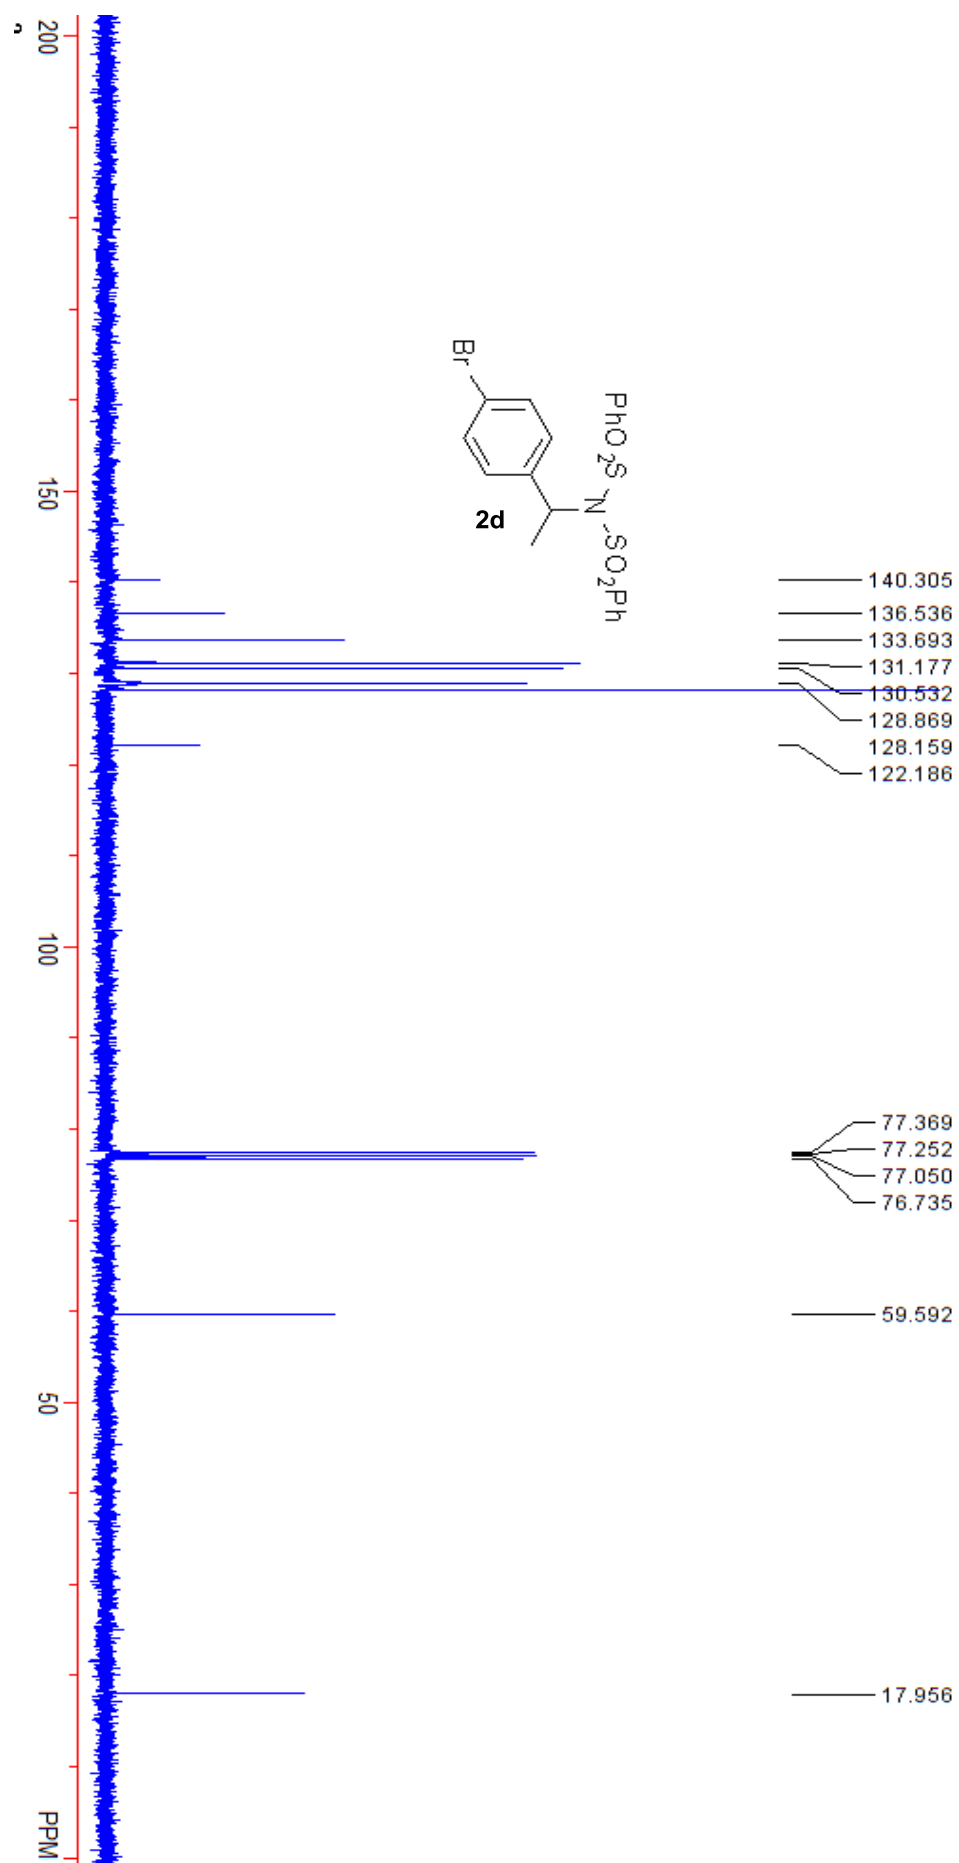

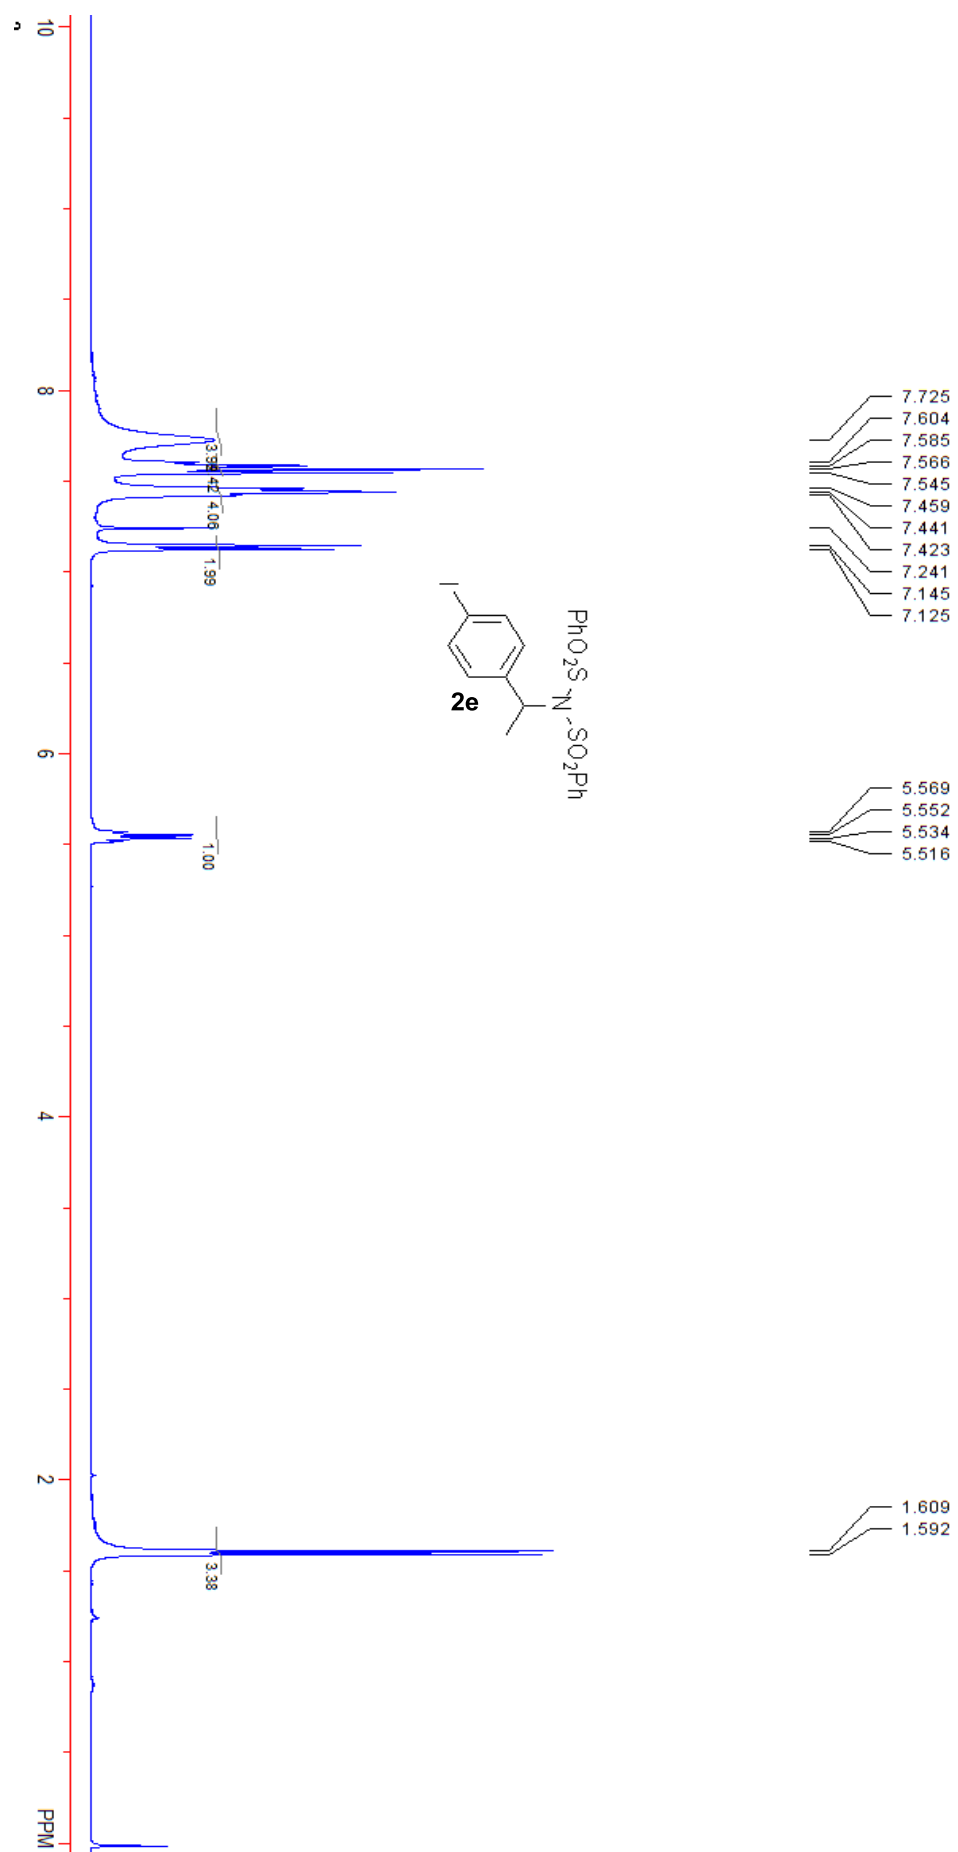

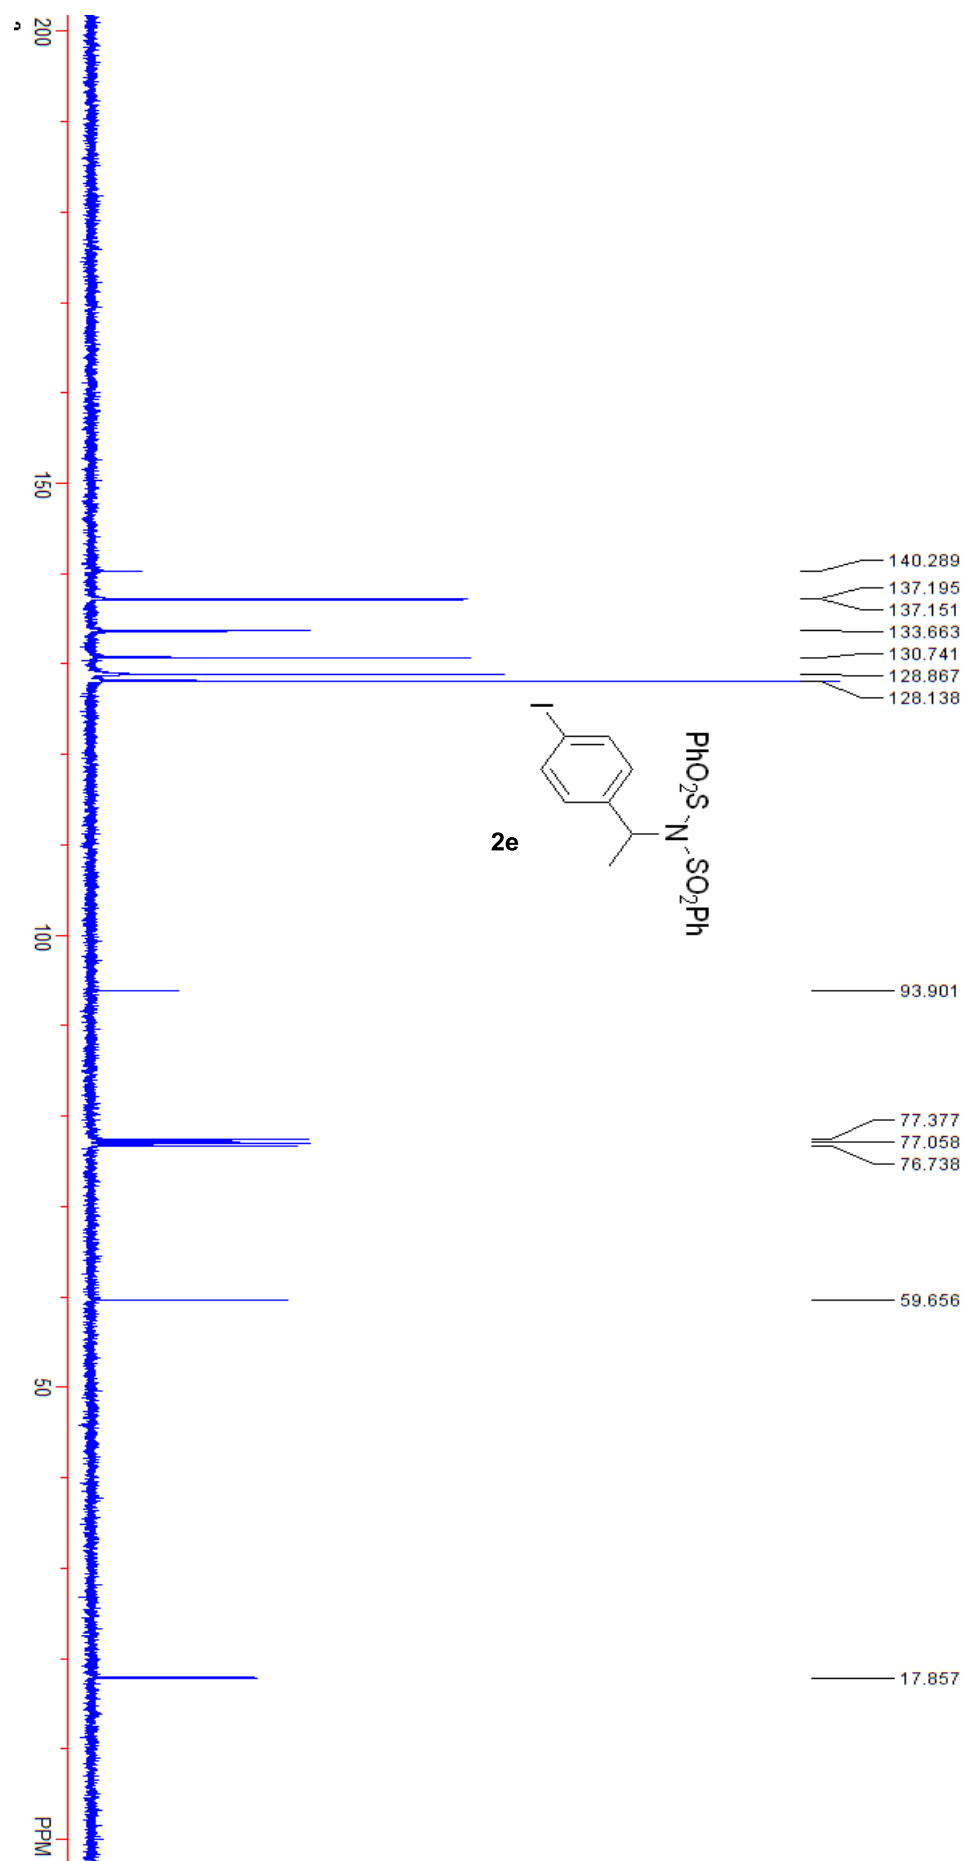

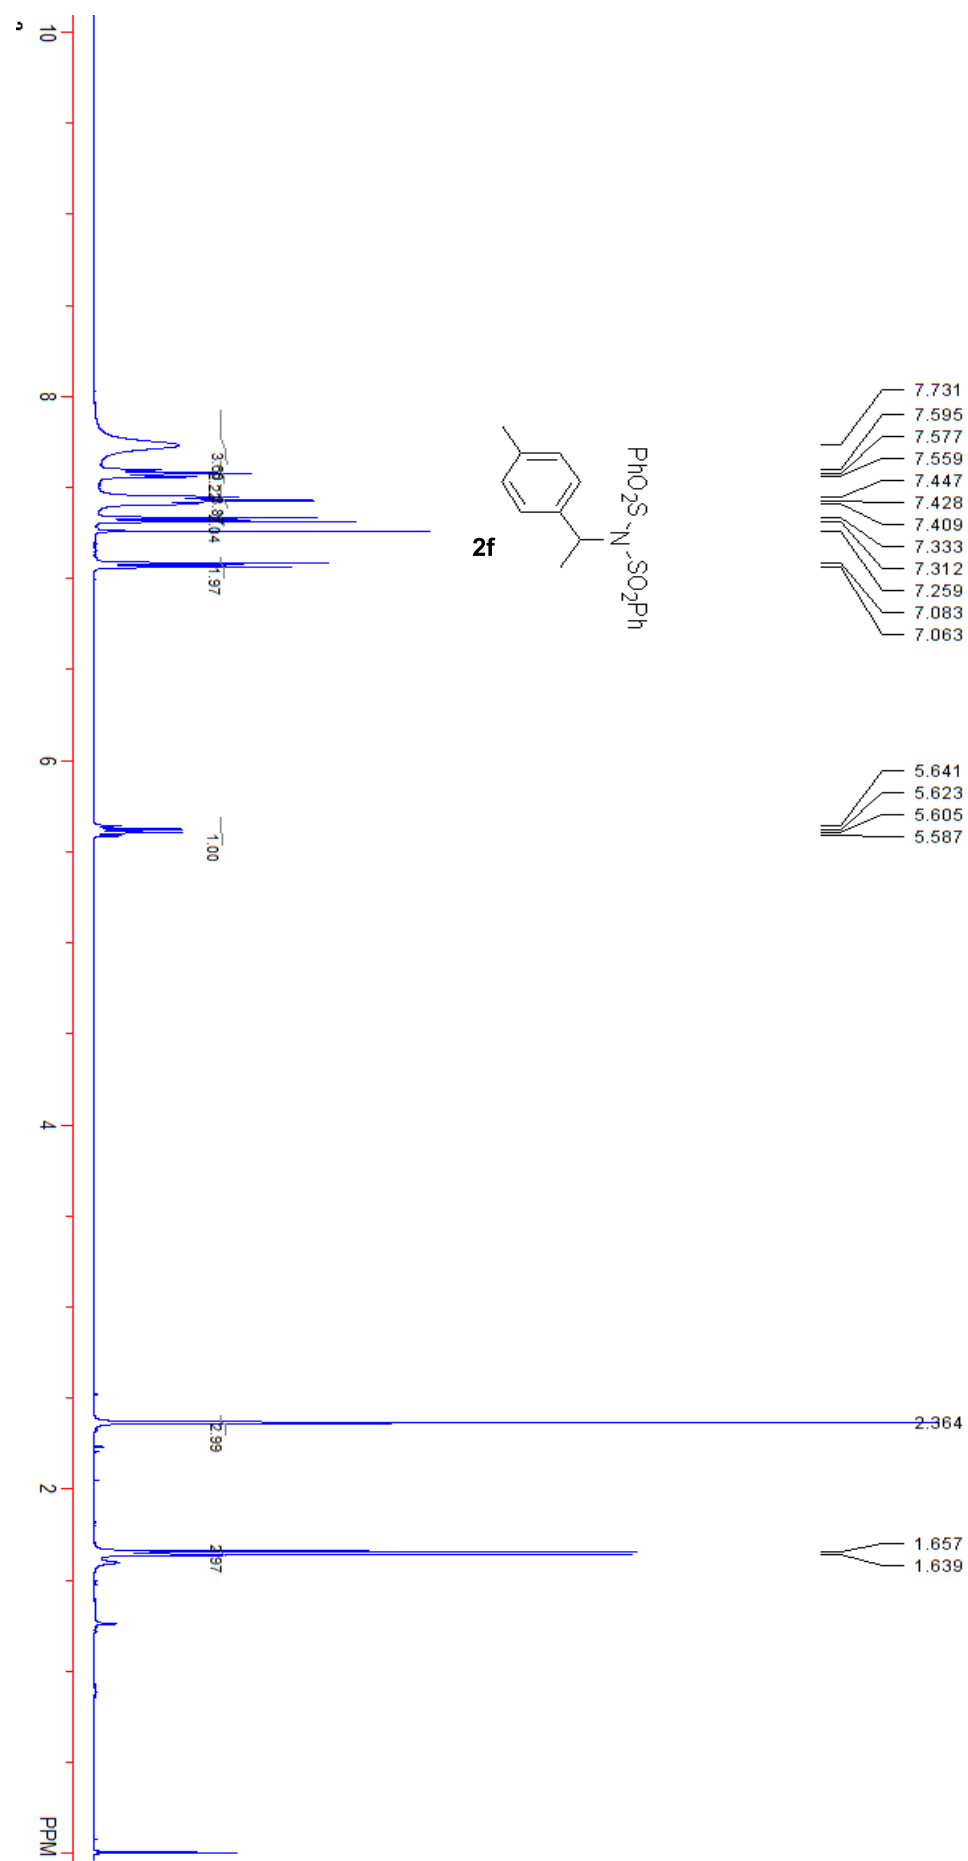

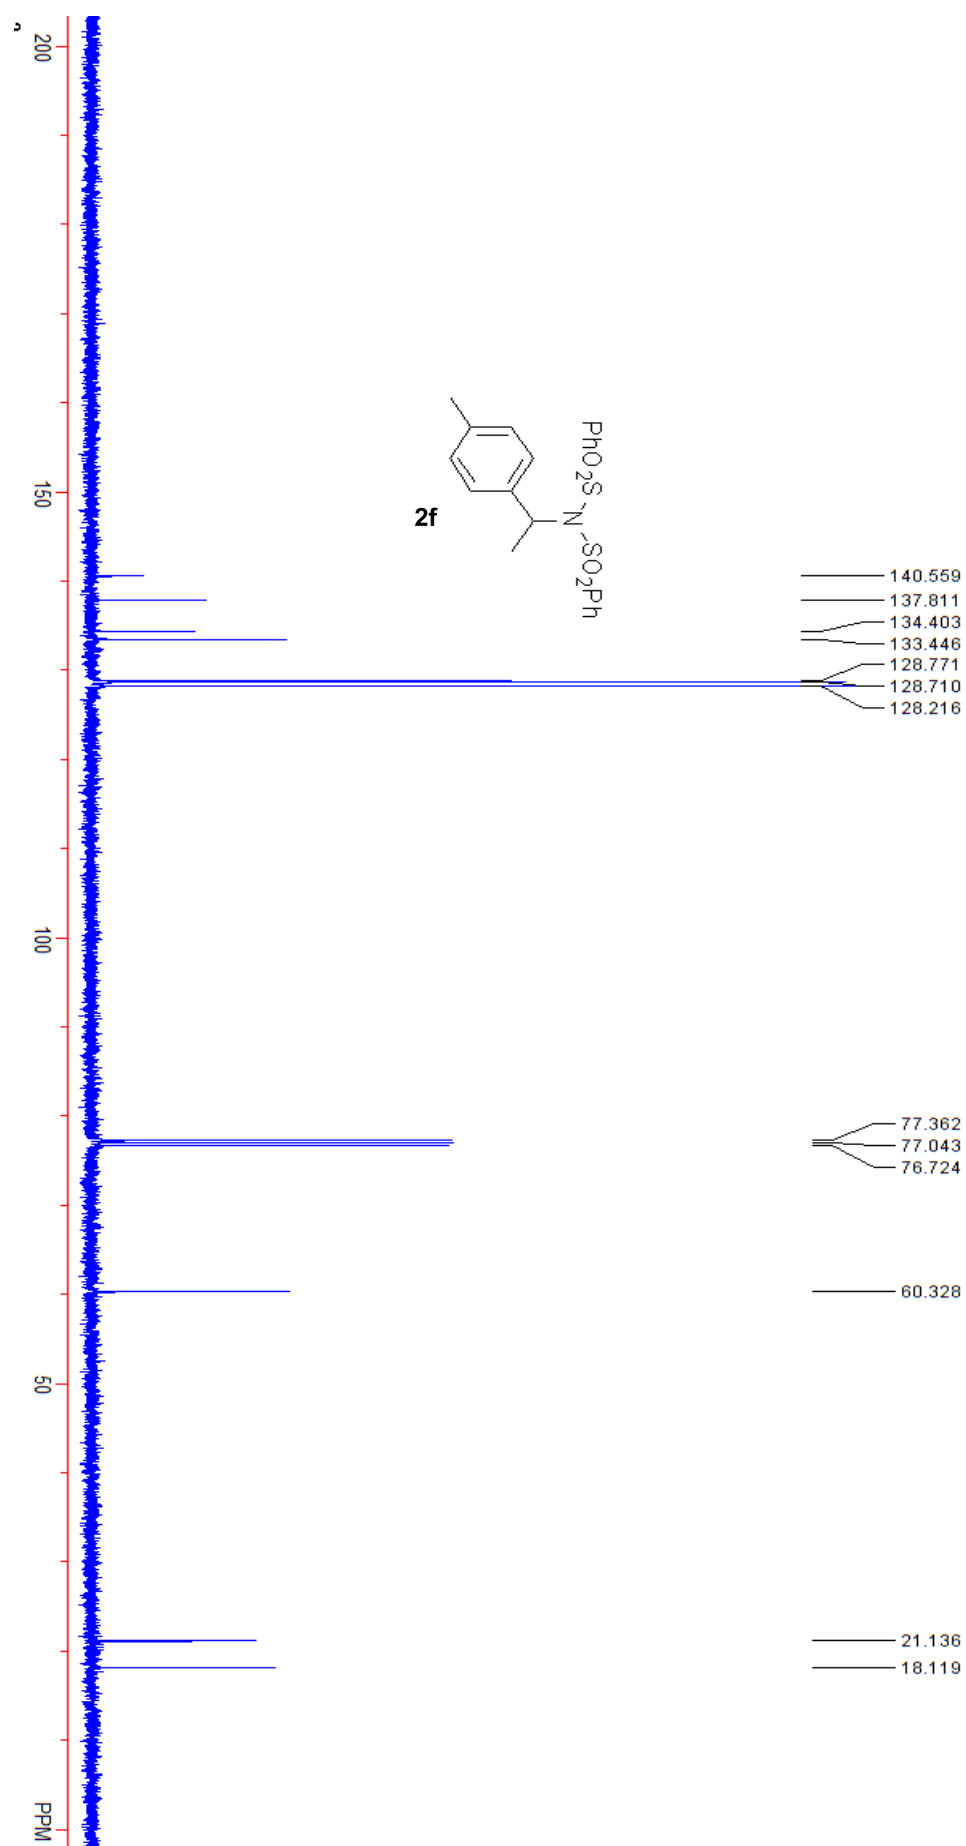

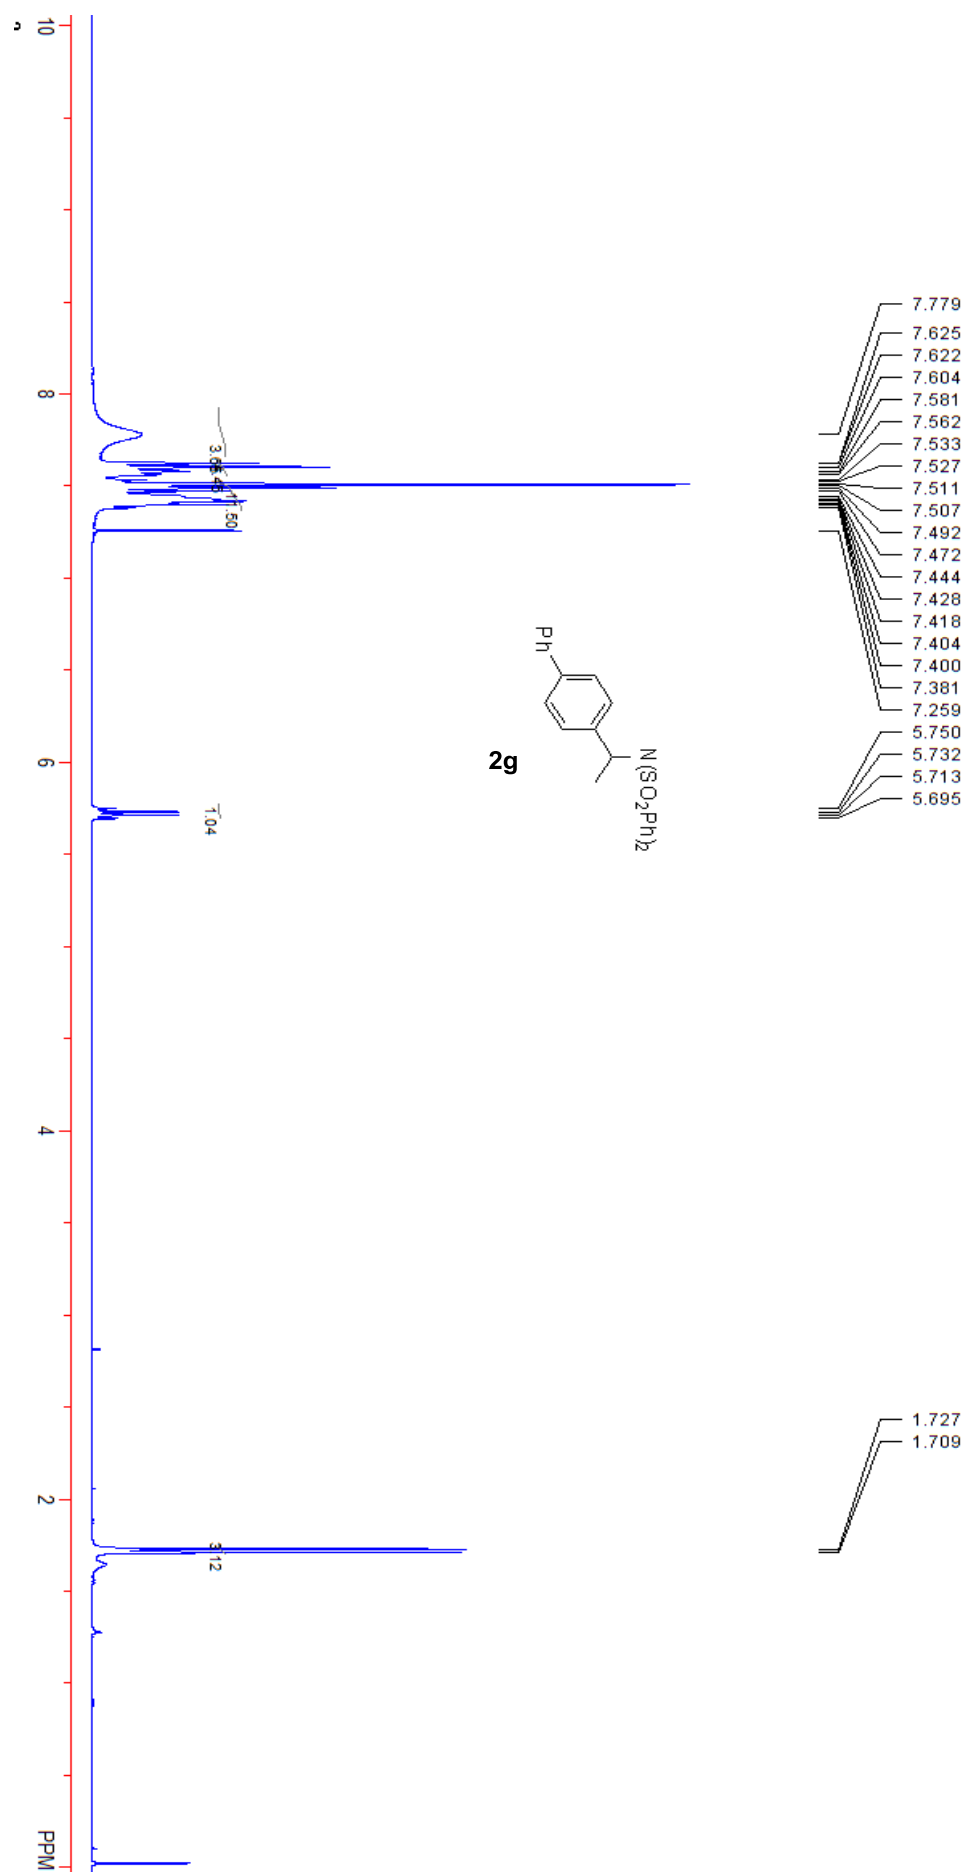



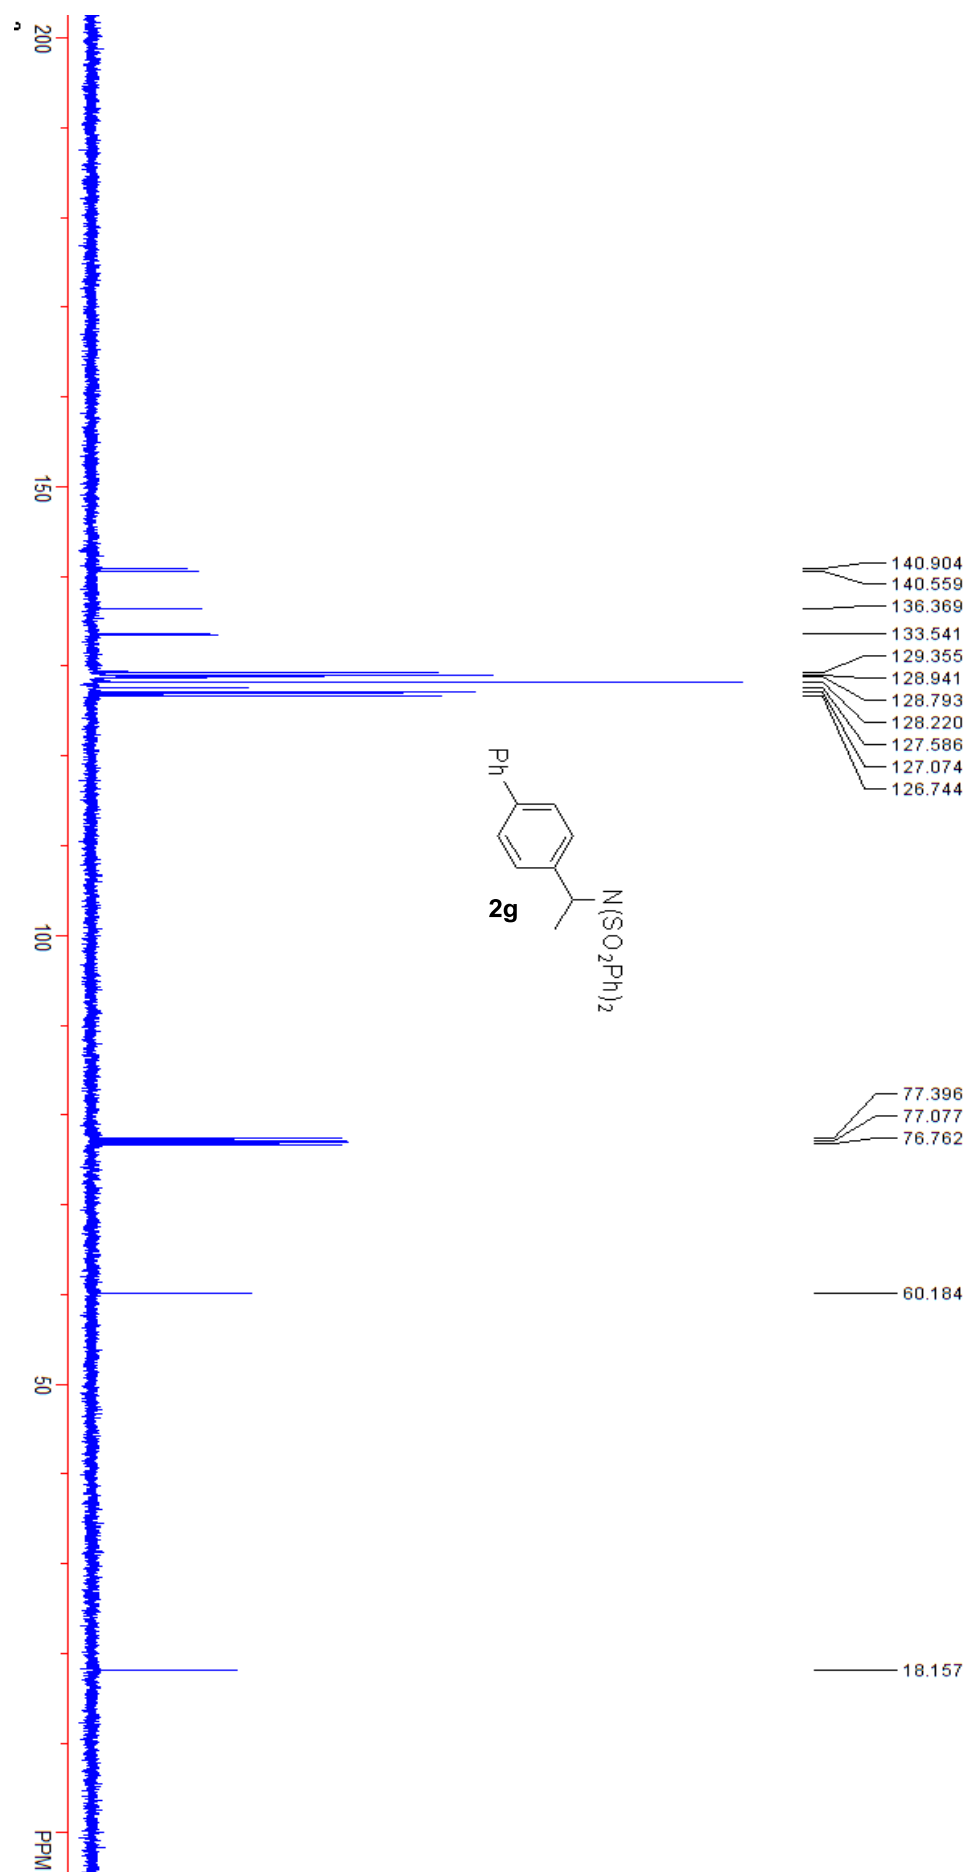

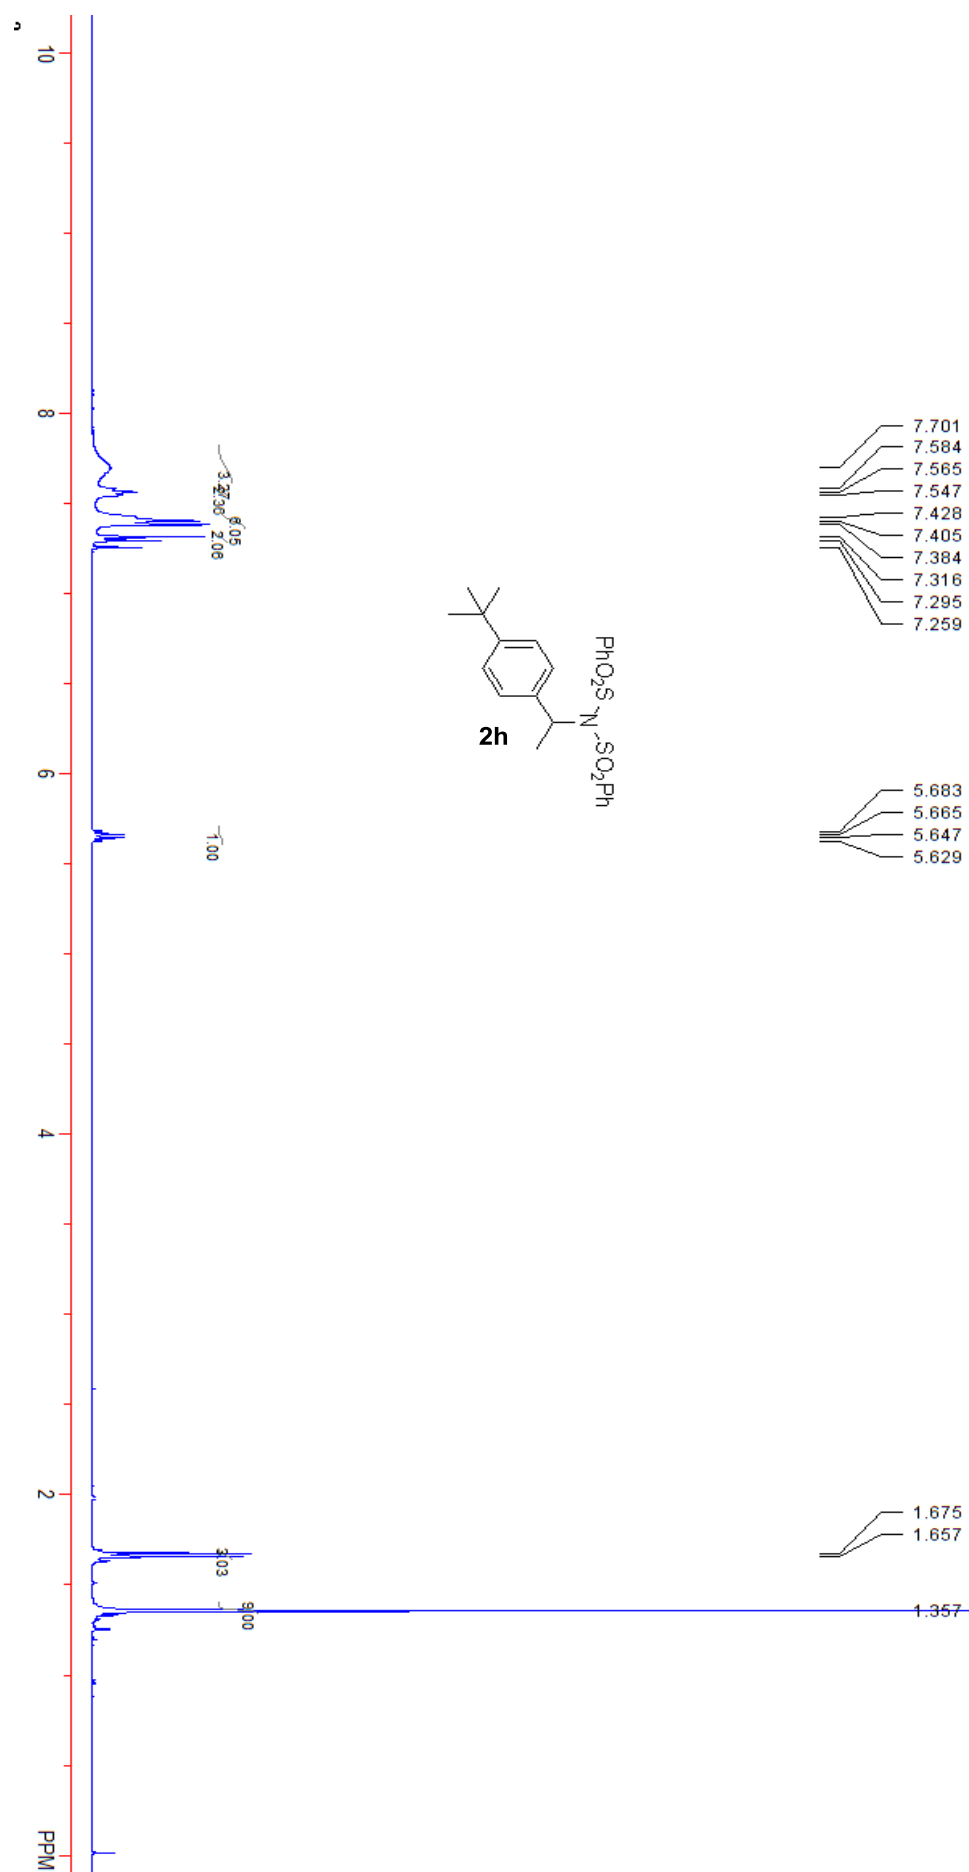

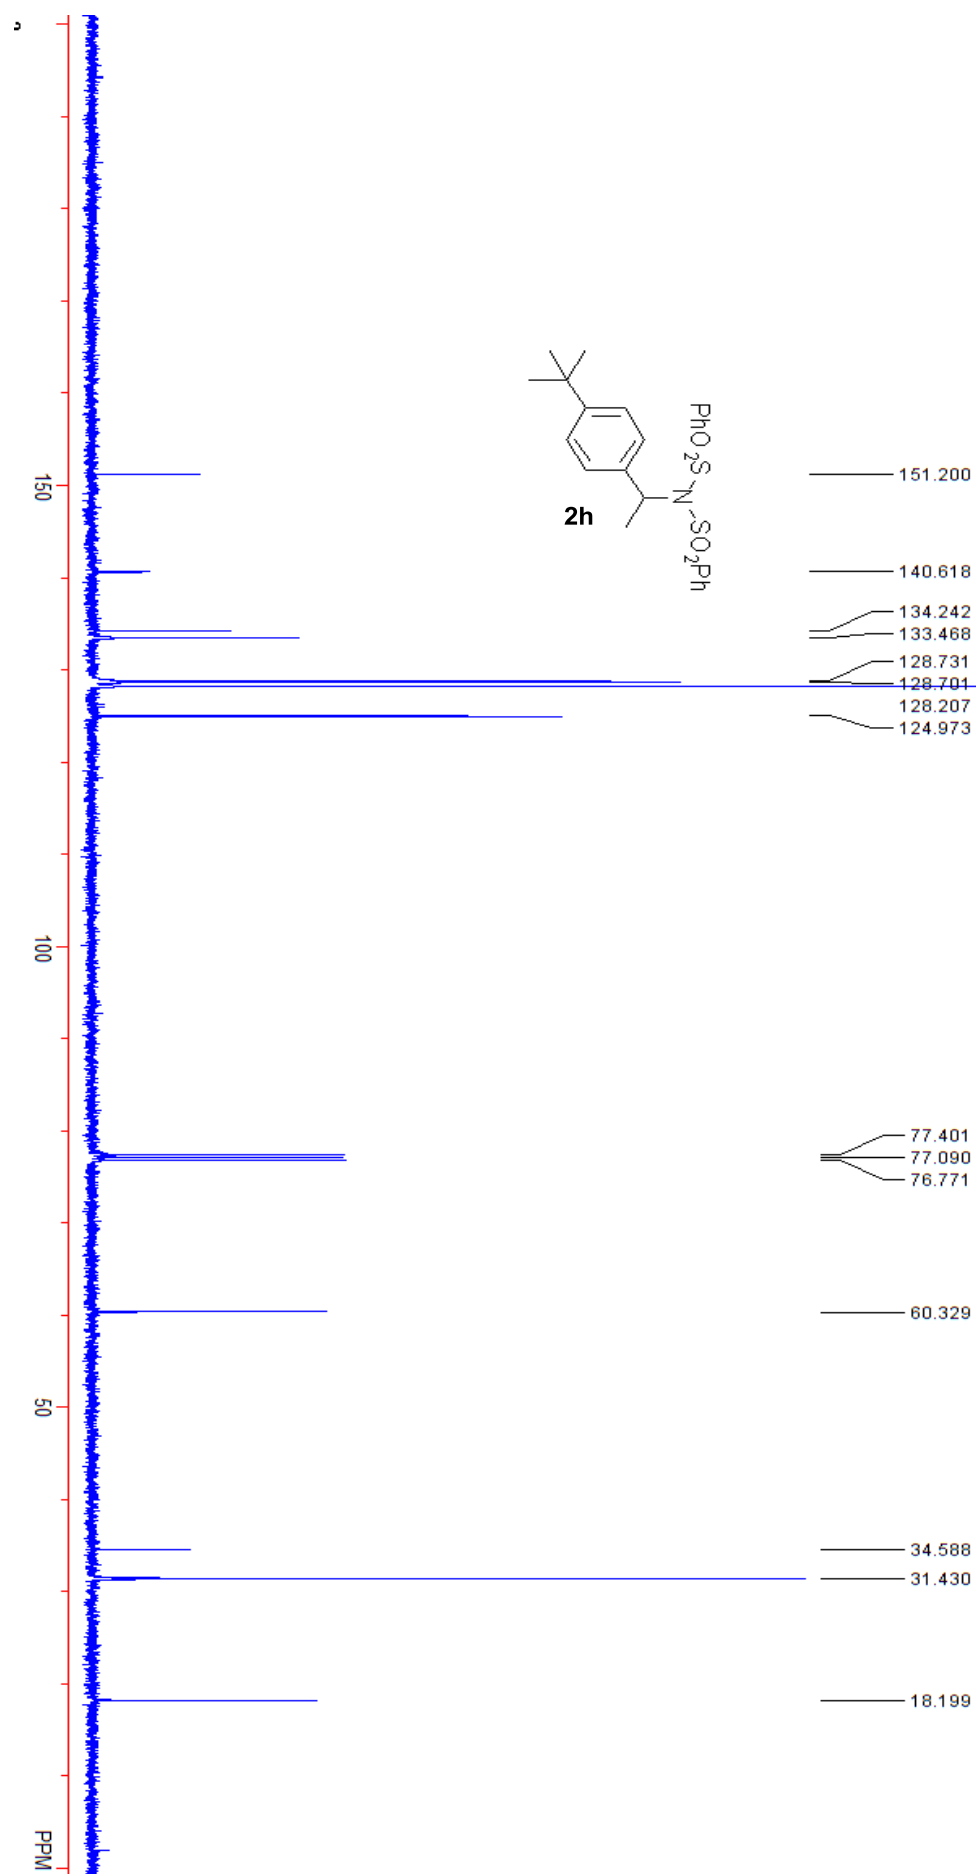

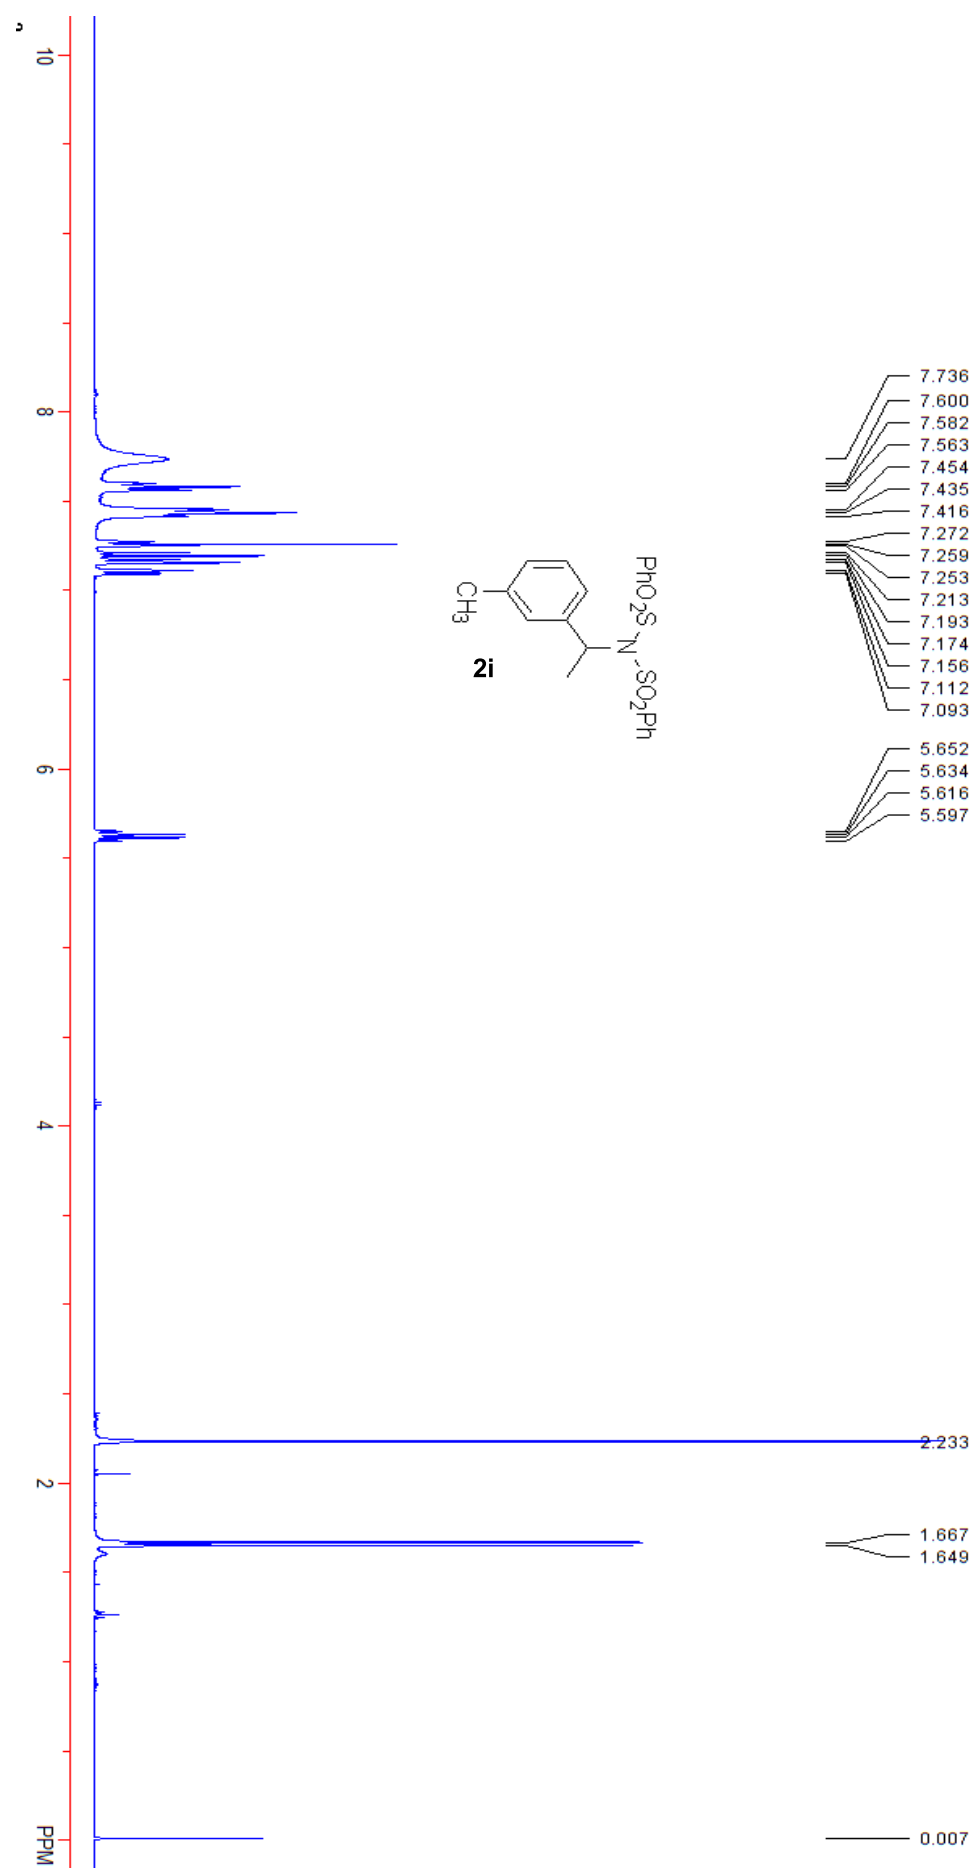

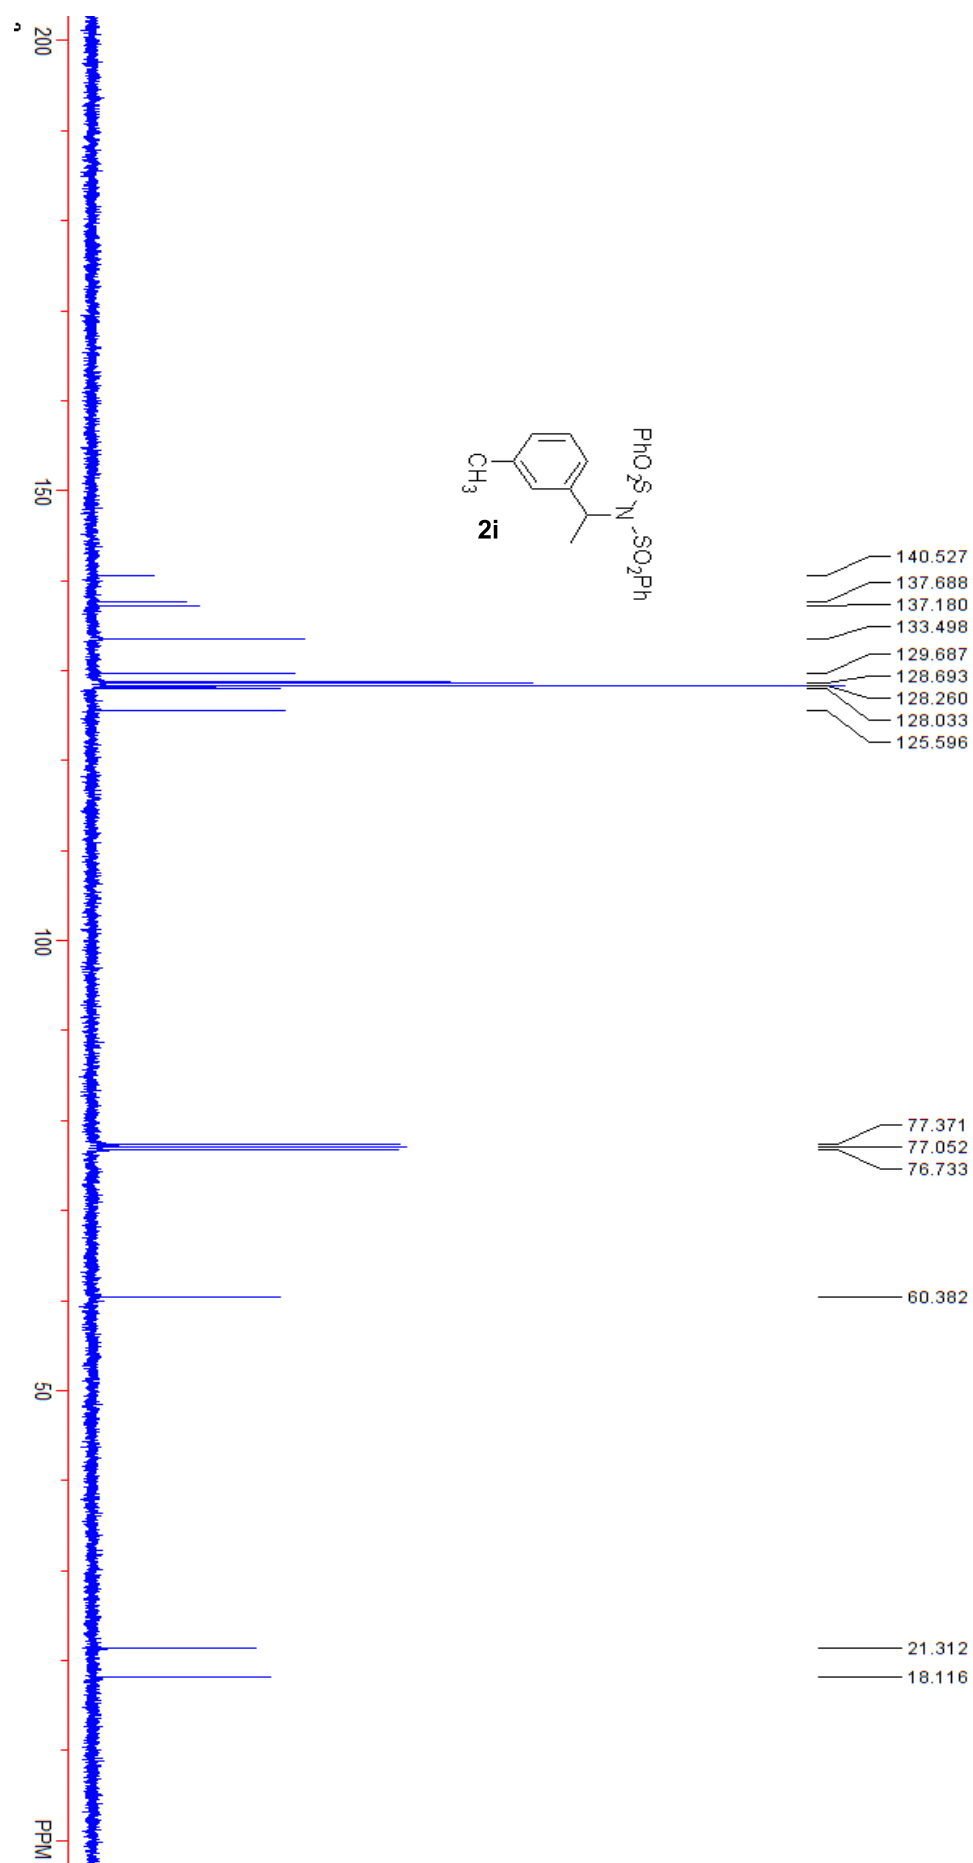

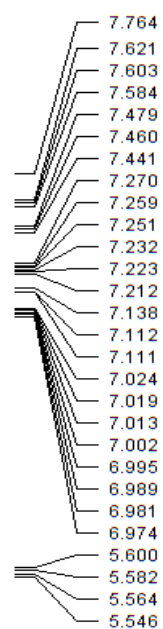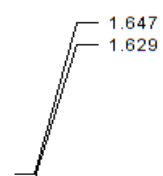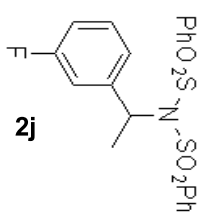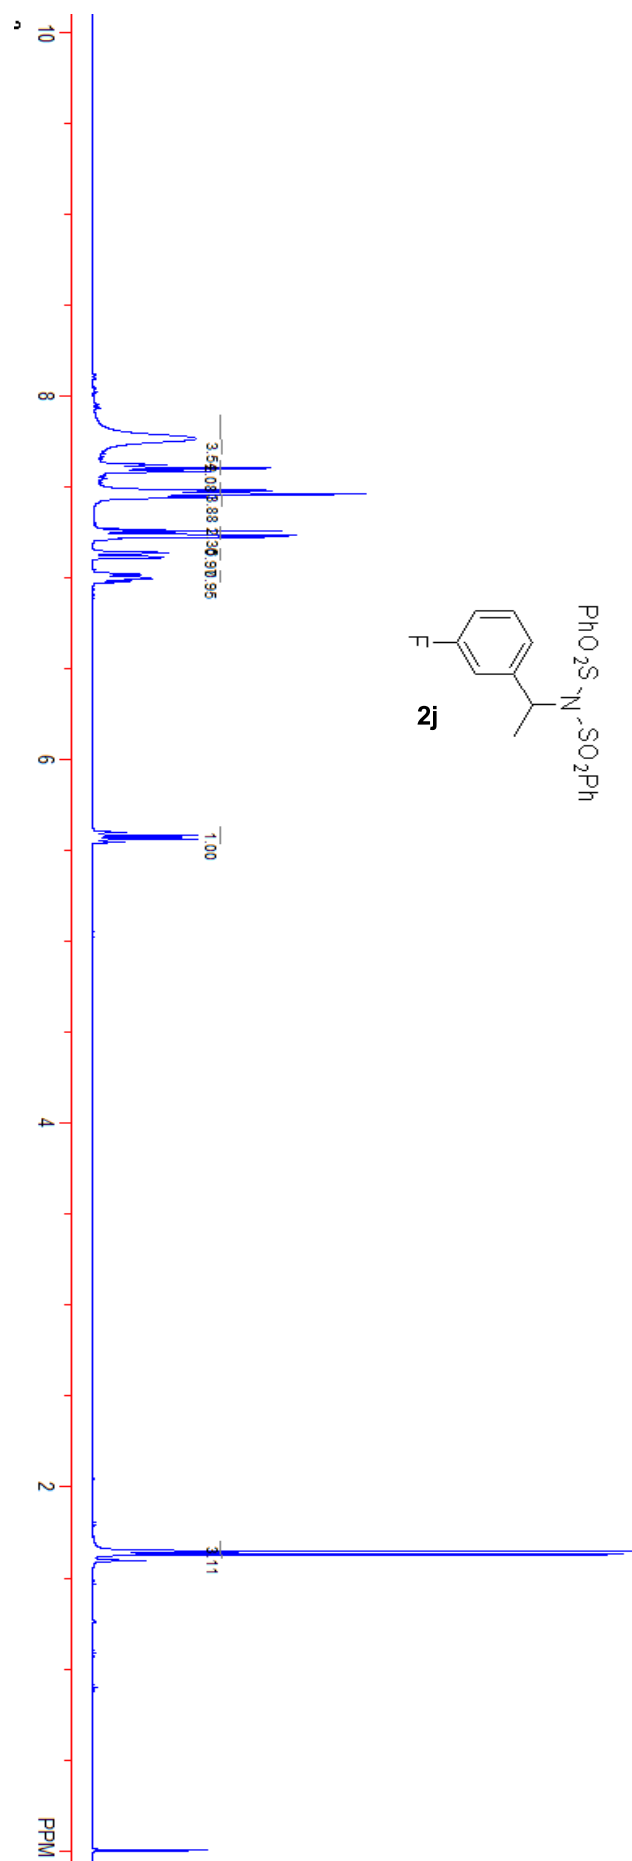

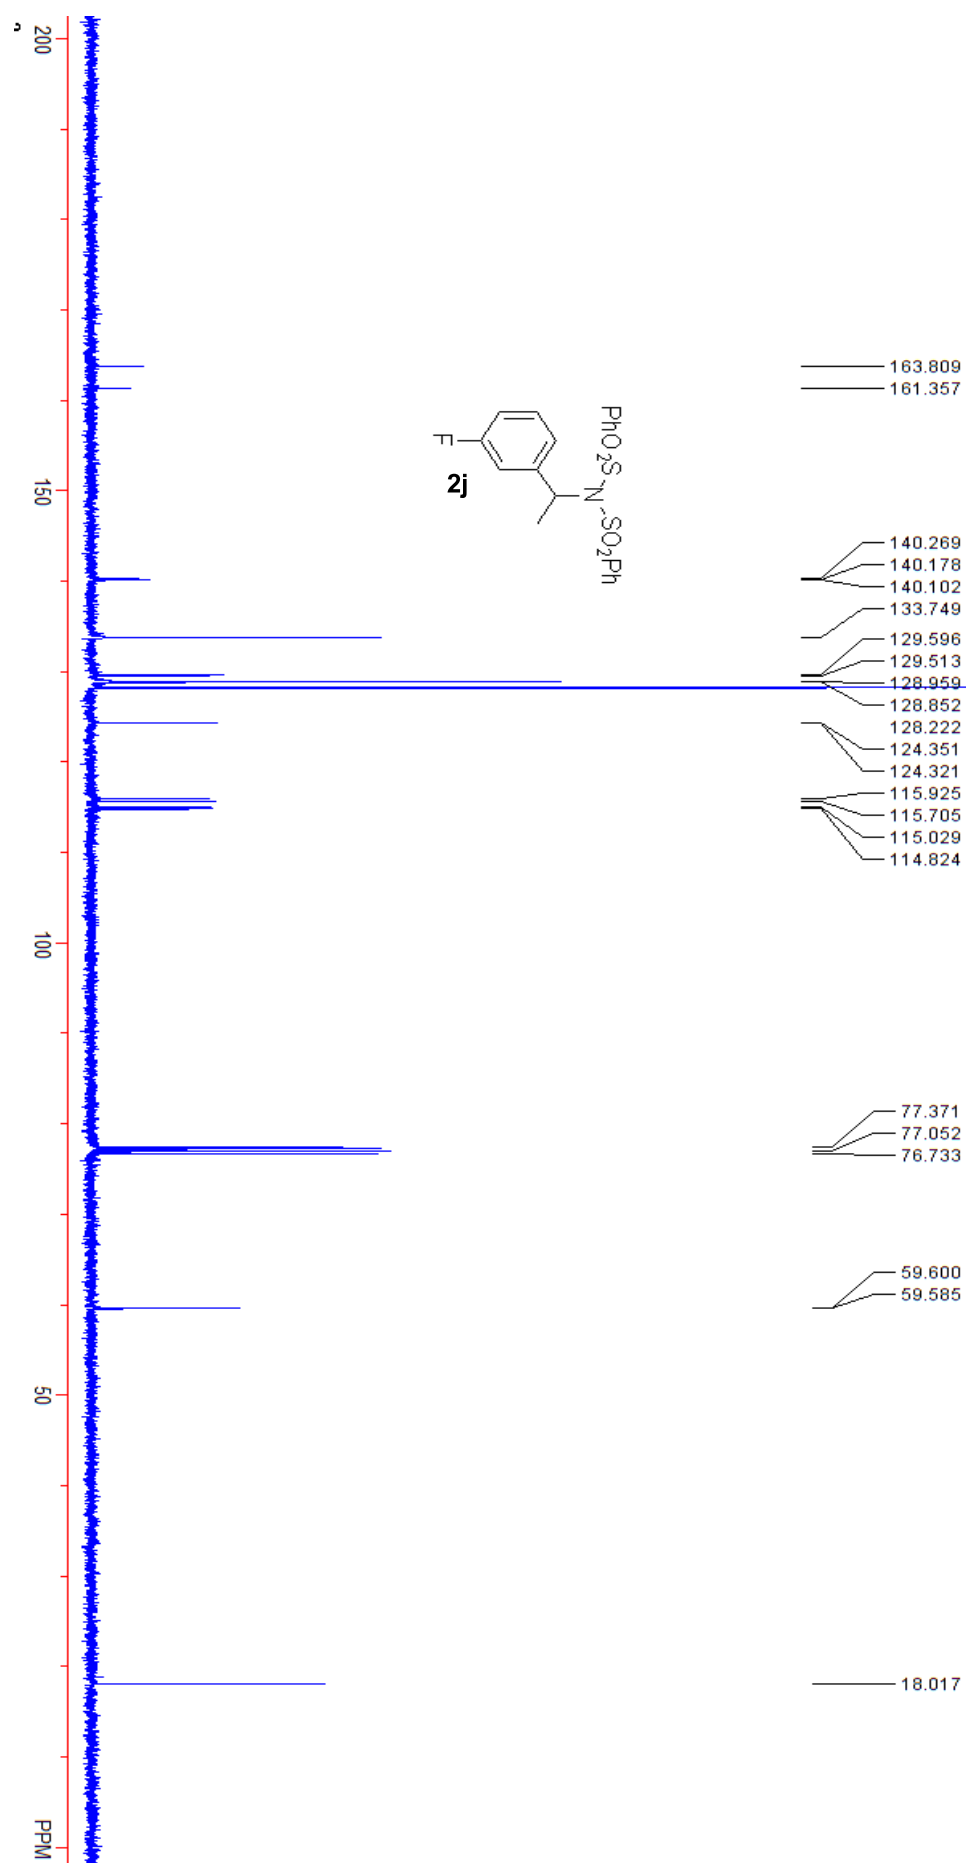

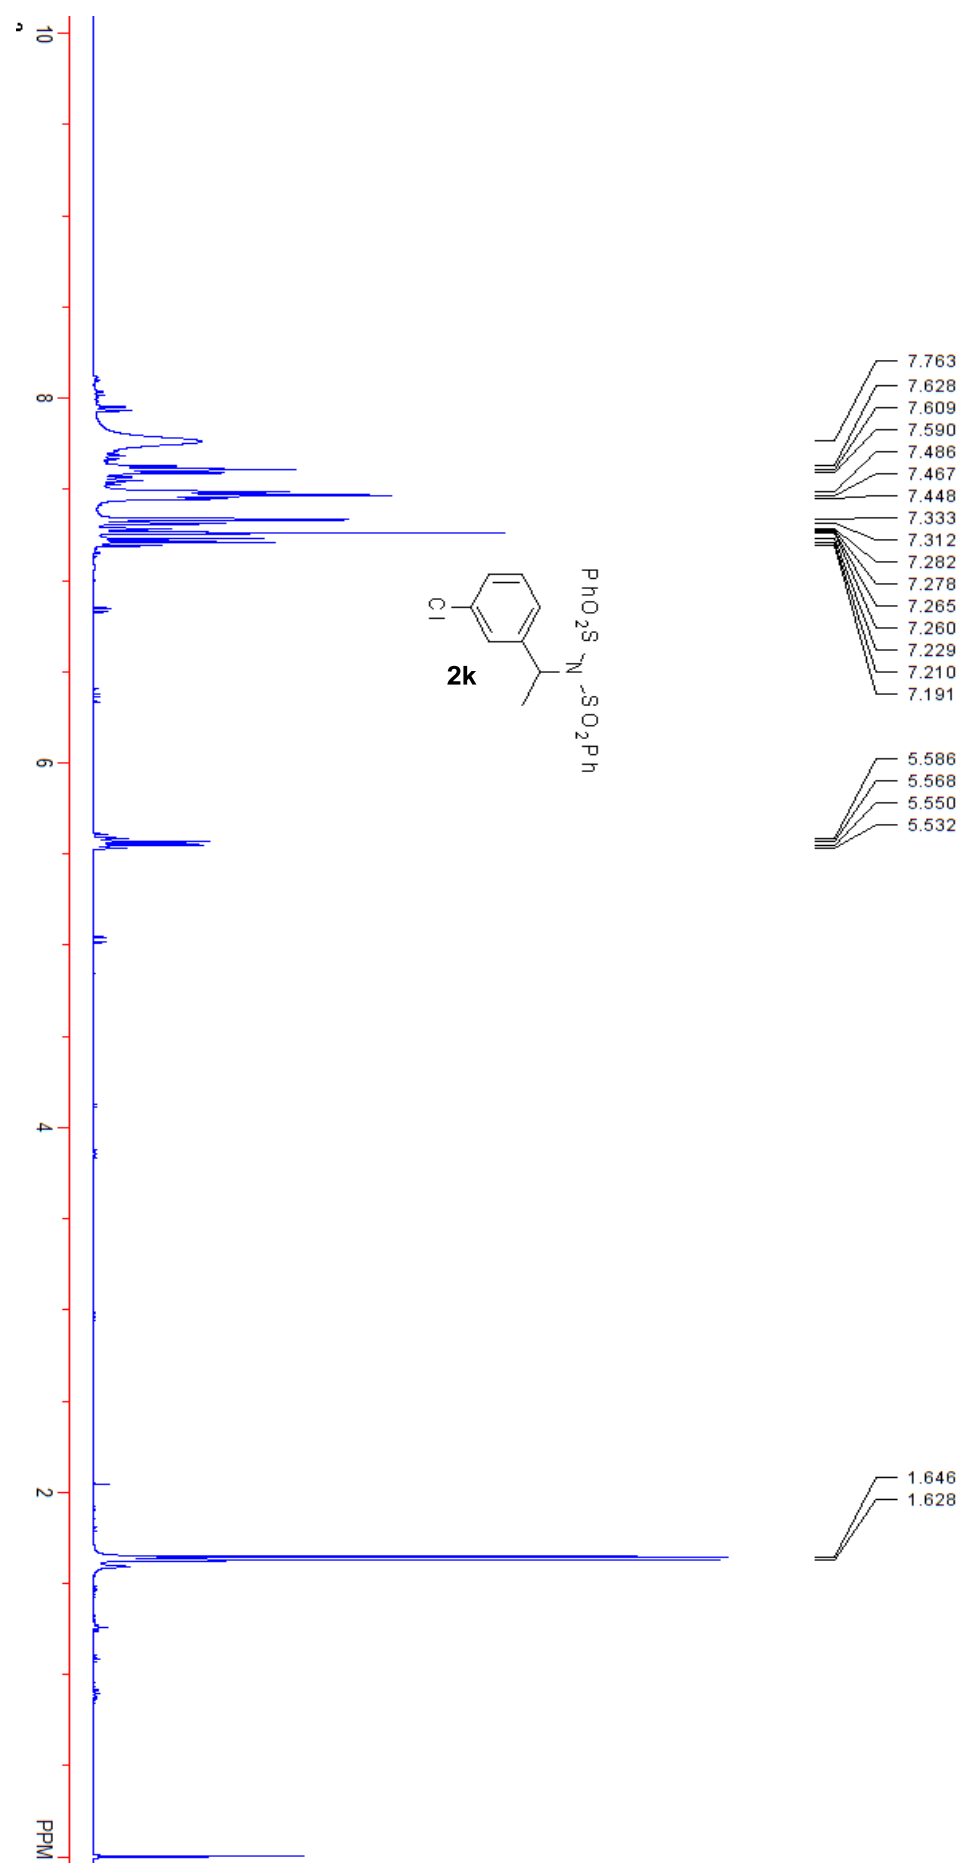



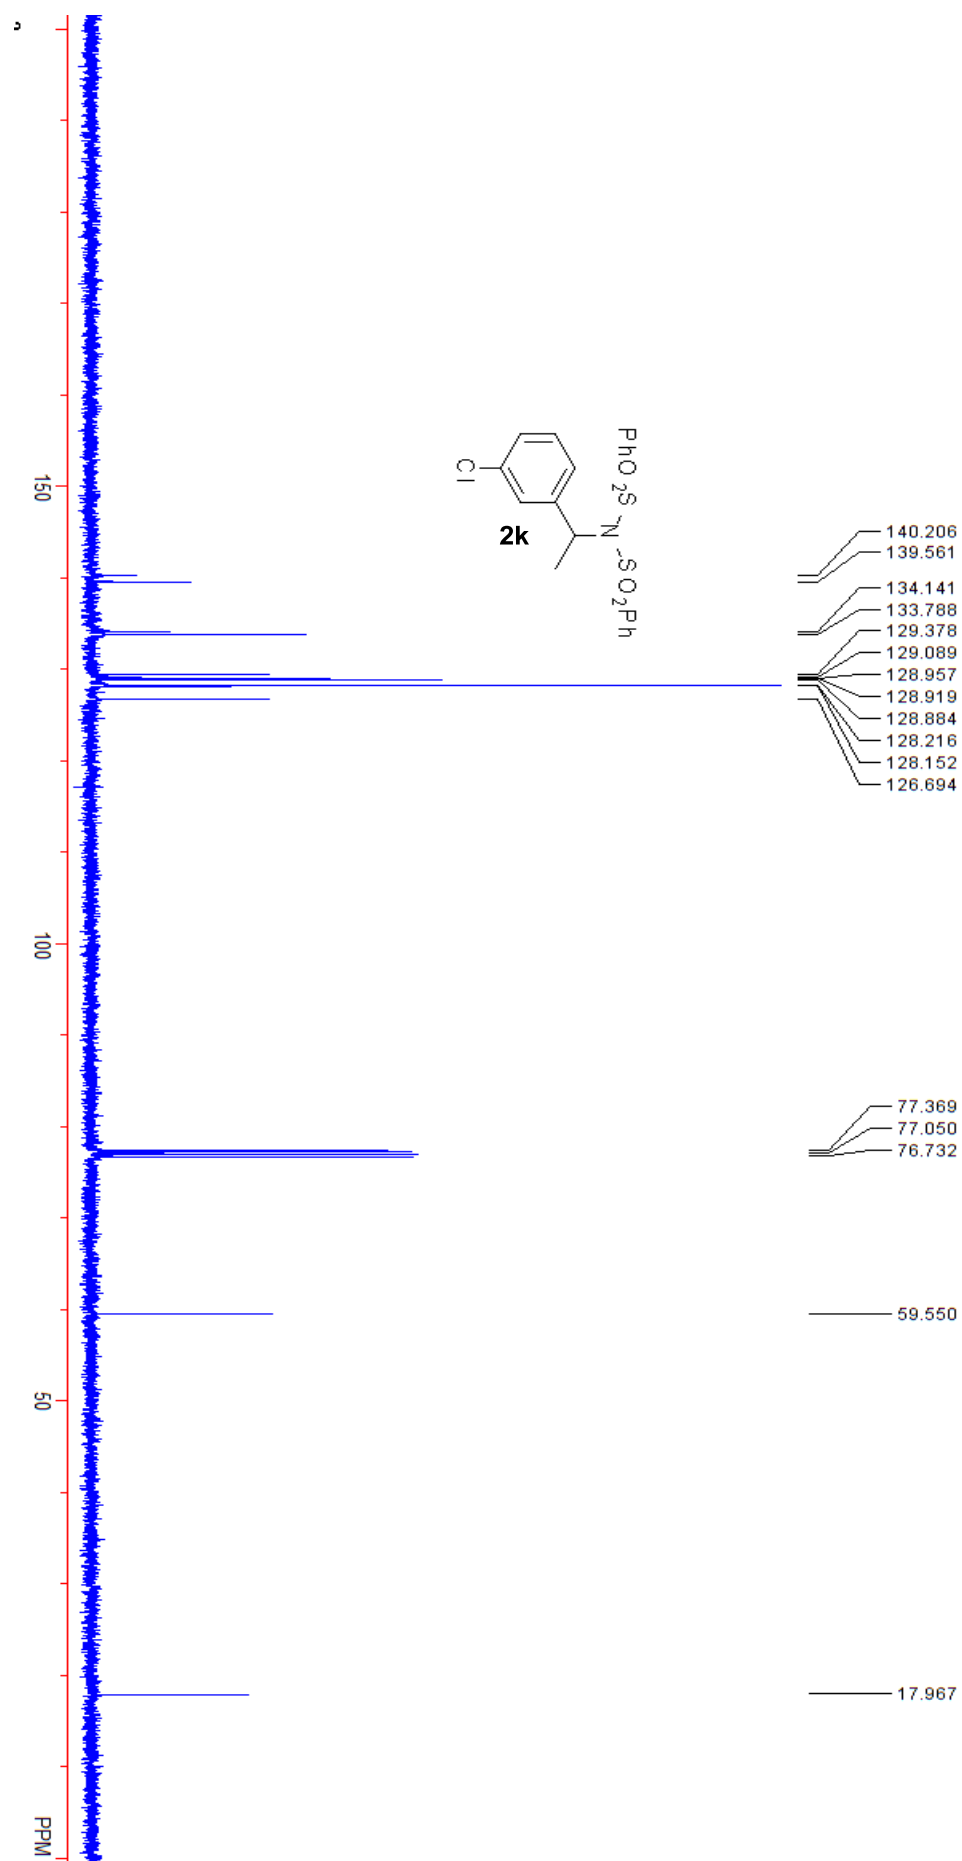

7.769  
7.763  
7.631  
7.612  
7.594  
7.491  
7.469  
7.452  
7.433  
7.413  
7.376  
7.356  
7.259  
7.172  
7.152  
7.132

5.582  
5.564  
5.546  
5.528

1.643  
1.625

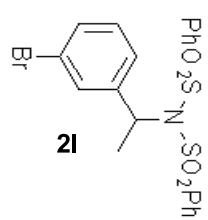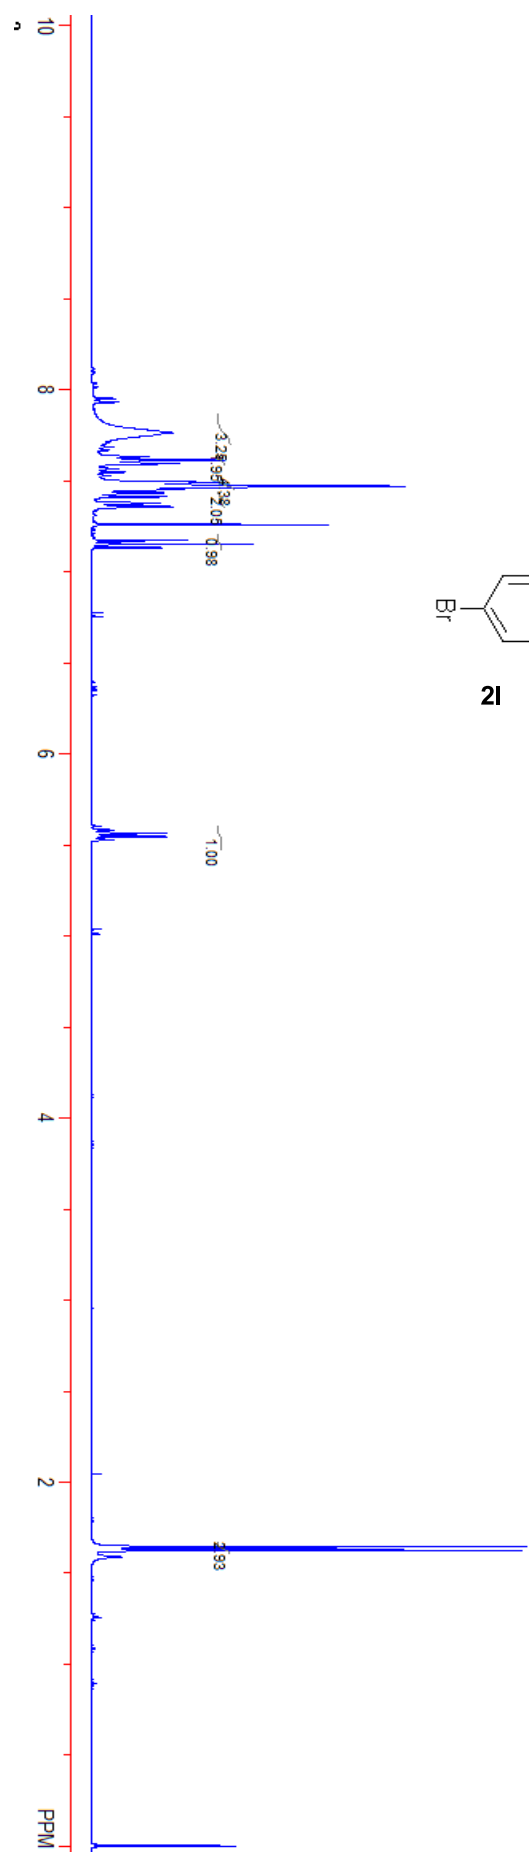

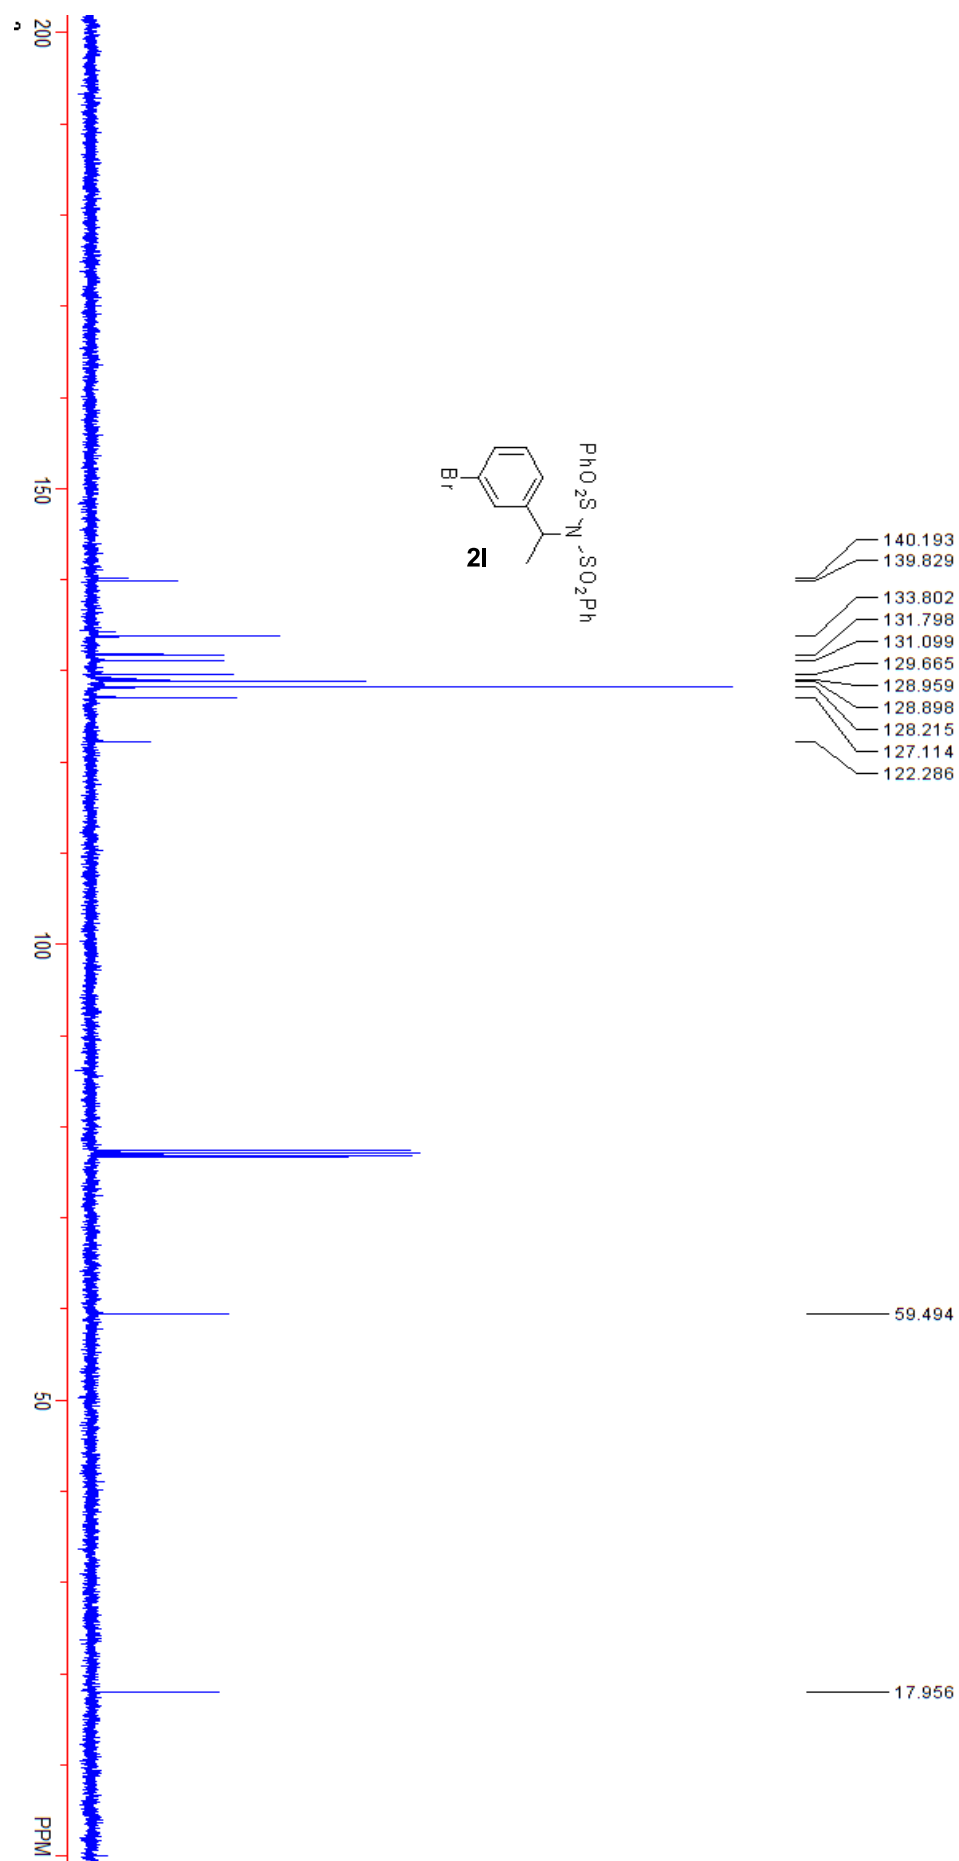

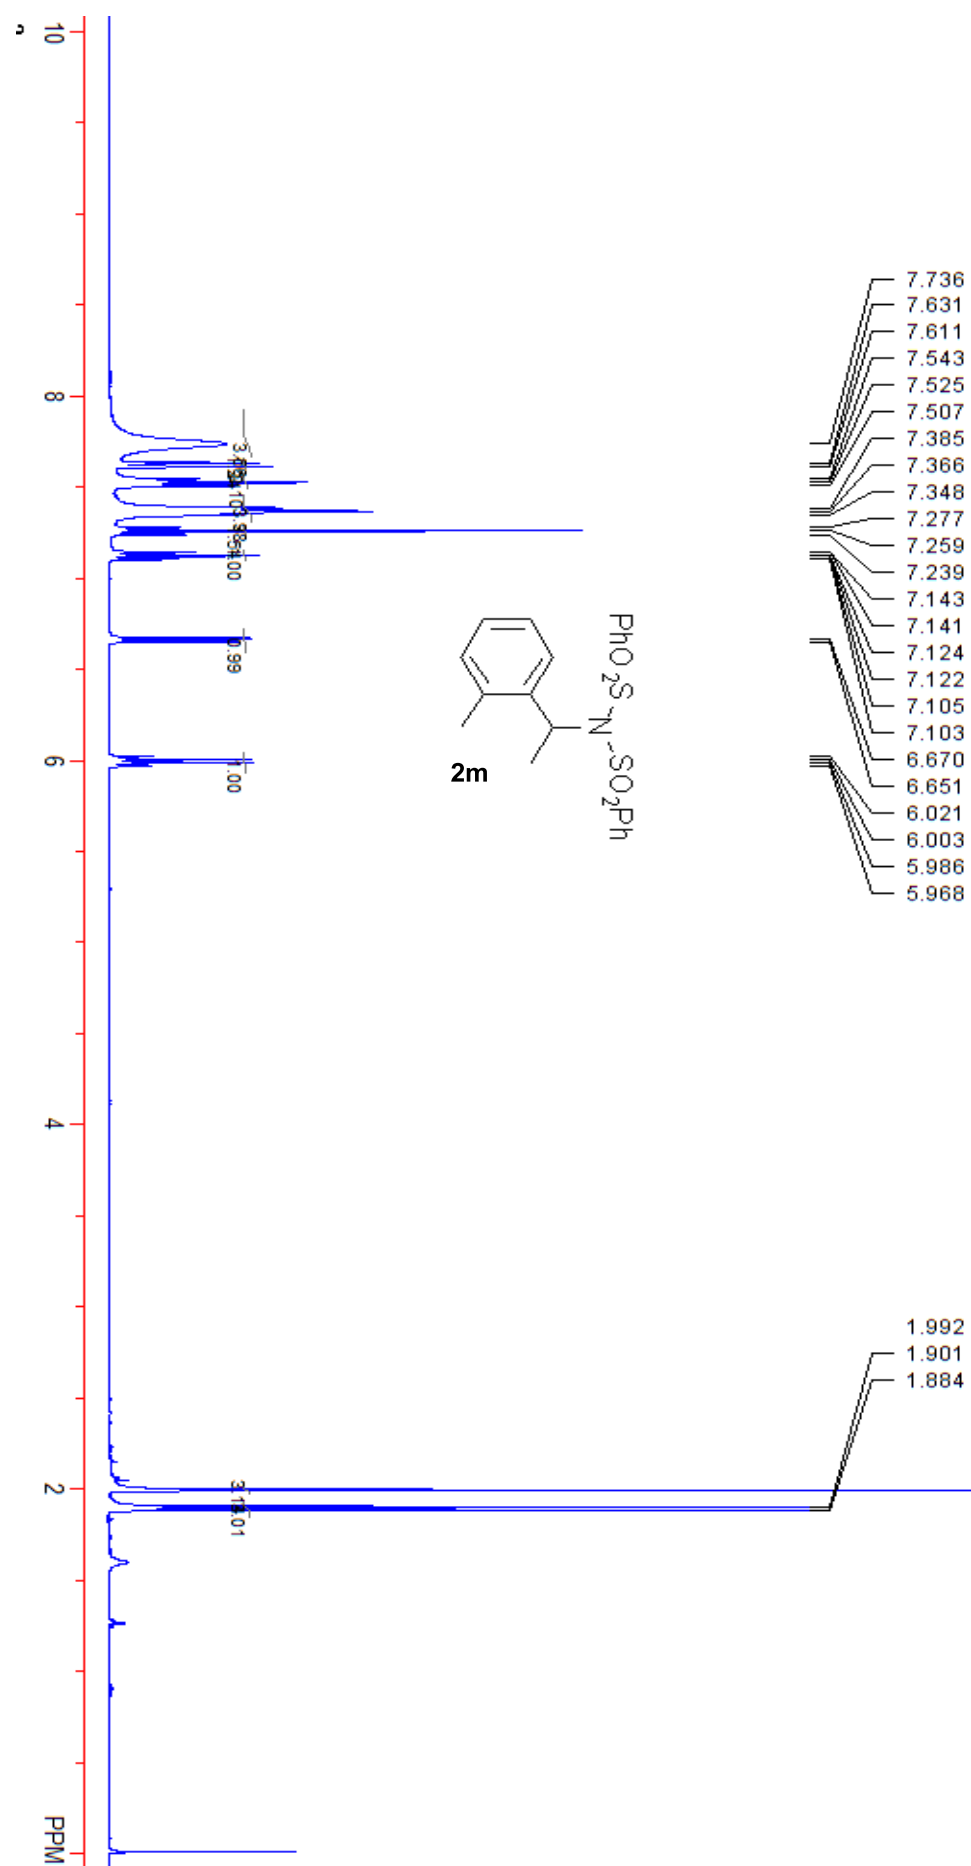

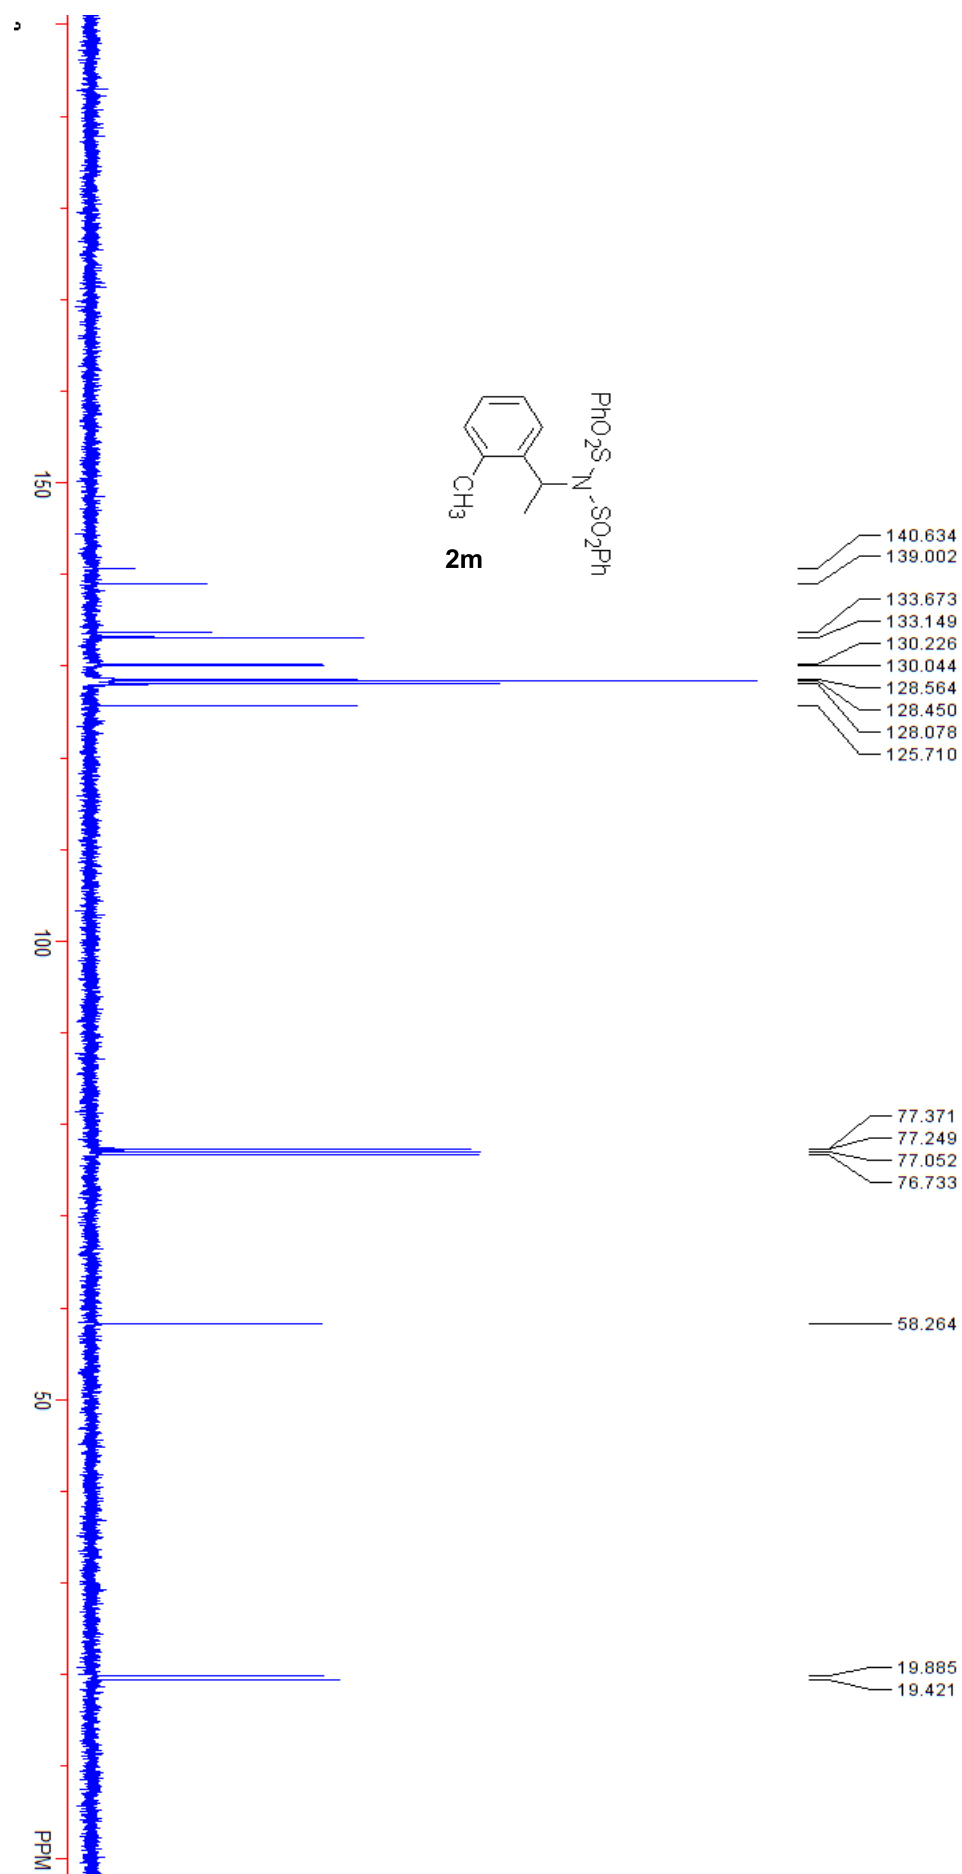

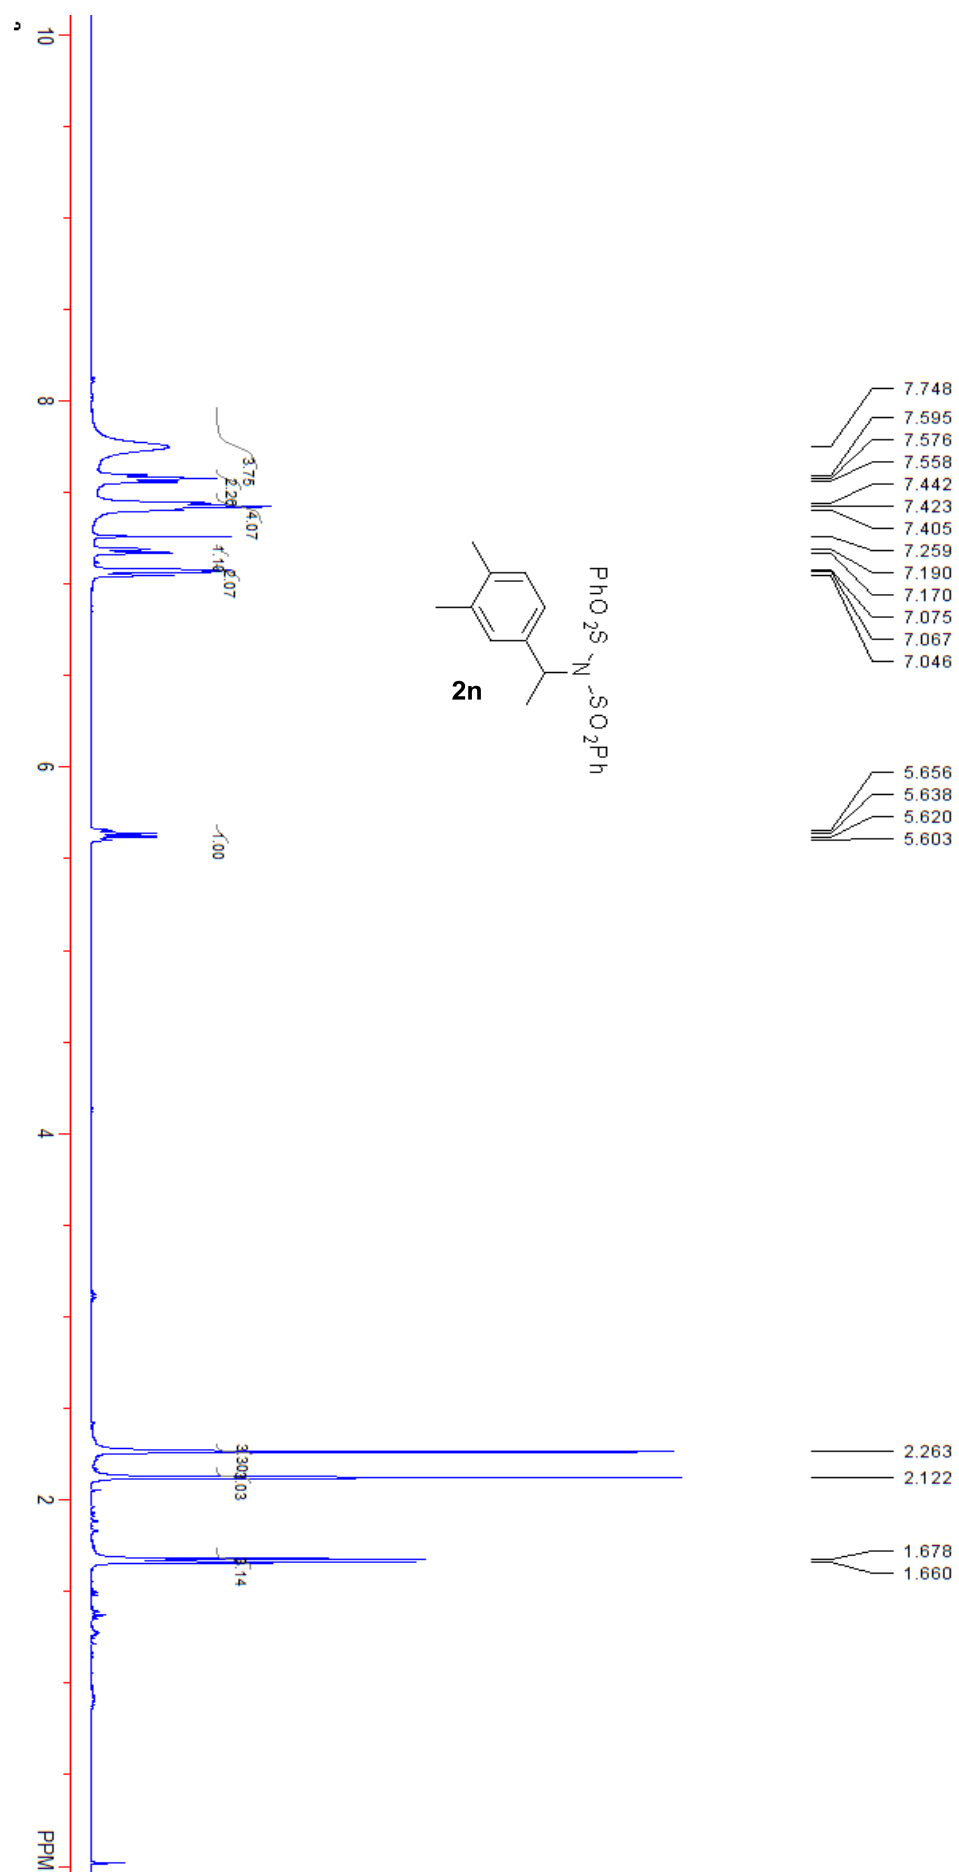

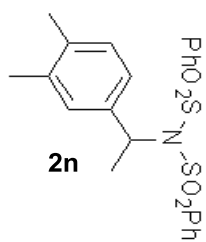

## 8. HPLC of products

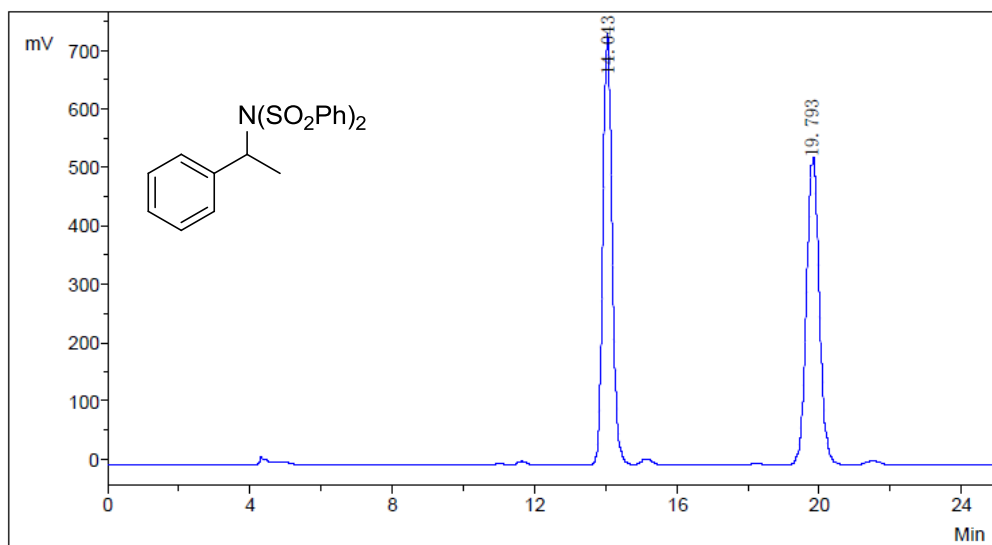

| 序号  | 峰号 | 组份名 | 保留时间   | 峰高        | 峰面积        | 面积百分比(%) |
|-----|----|-----|--------|-----------|------------|----------|
| 1   | 1  |     | 14.043 | 736454.7  | 13128351.8 | 50.1081  |
| 2   | 2  |     | 19.793 | 511380.3  | 13071682.9 | 49.8919  |
| 合计: |    |     |        | 1247835.0 | 26200034.8 | 100.0000 |

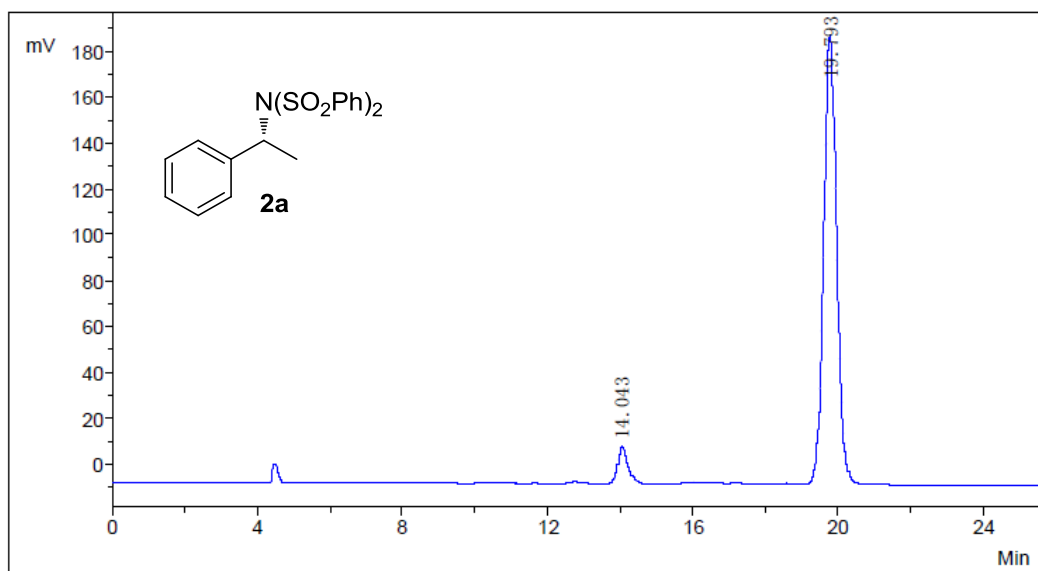

| 序号  | 峰号 | 组份名 | 保留时间   | 峰高       | 峰面积       | 面积百分比(%) |
|-----|----|-----|--------|----------|-----------|----------|
| 1   | 1  |     | 14.043 | 15976.1  | 318451.2  | 6.1314   |
| 2   | 2  |     | 19.793 | 195677.6 | 4875286.5 | 93.8686  |
| 合计: |    |     |        | 211653.7 | 5193737.7 | 100.0000 |



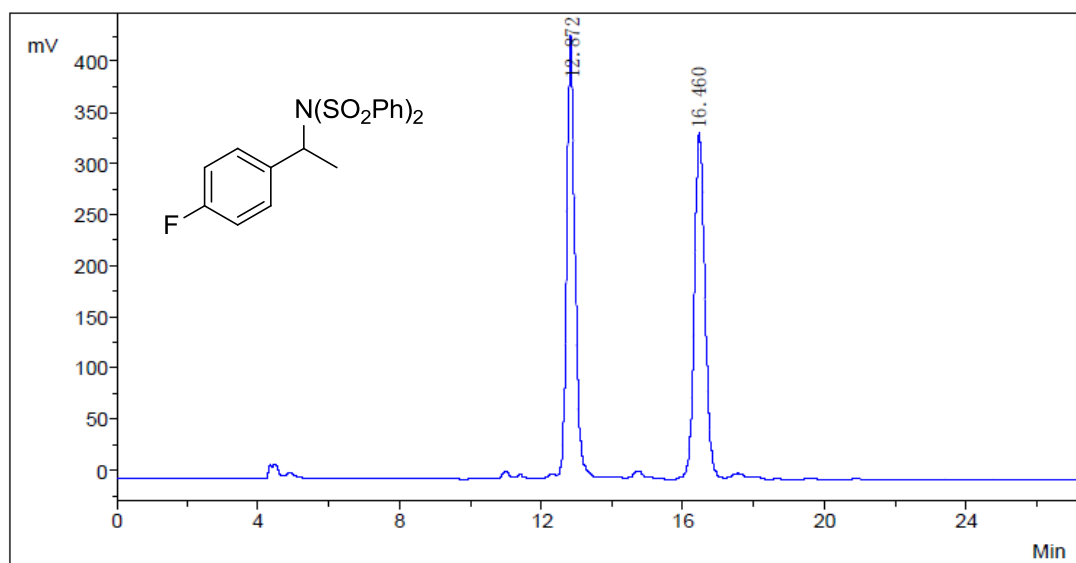

| 序号  | 峰号 | 组份名 | 保留时间   | 峰高       | 峰面积        | 面积百分比(%) |
|-----|----|-----|--------|----------|------------|----------|
| 1   | 1  |     | 12.872 | 401725.2 | 6989038.7  | 50.0161  |
| 2   | 2  |     | 16.460 | 334584.0 | 6984544.4  | 49.9839  |
| 合计: |    |     |        | 736309.2 | 13973583.1 | 100.0000 |

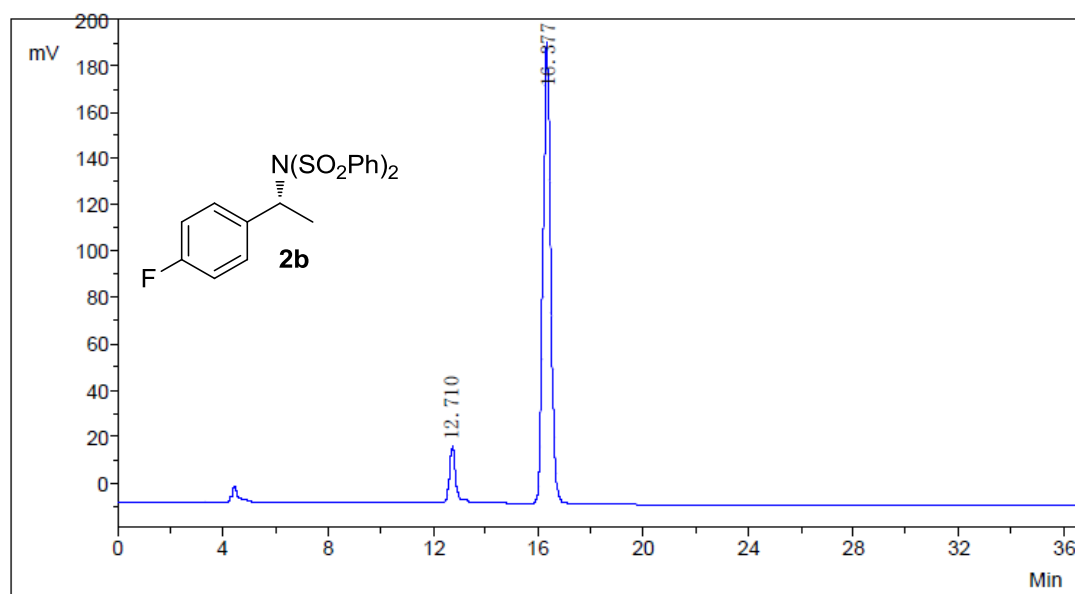

| 序号  | 峰号 | 组份名 | 保留时间   | 峰高       | 峰面积       | 面积百分比(%) |
|-----|----|-----|--------|----------|-----------|----------|
| 1   | 1  |     | 12.710 | 23547.8  | 407834.4  | 9.2311   |
| 2   | 2  |     | 16.377 | 189036.3 | 4010217.3 | 90.7689  |
| 合计: |    |     |        | 212584.1 | 4418051.8 | 100.0000 |

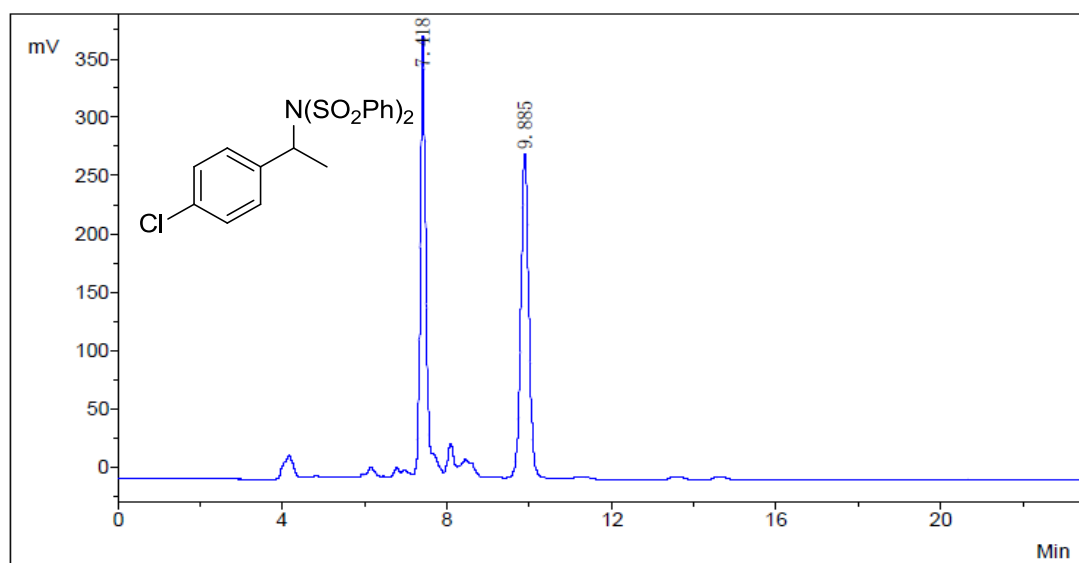

| 序号  | 峰号 | 组份名 | 保留时间  | 峰高       | 峰面积       | 面积百分比(%) |
|-----|----|-----|-------|----------|-----------|----------|
| 1   | 1  |     | 7.418 | 374387.1 | 3624424.5 | 49.2498  |
| 2   | 2  |     | 9.885 | 274034.4 | 3734842.6 | 50.7502  |
| 合计: |    |     |       | 648421.5 | 7359267.1 | 100.0000 |

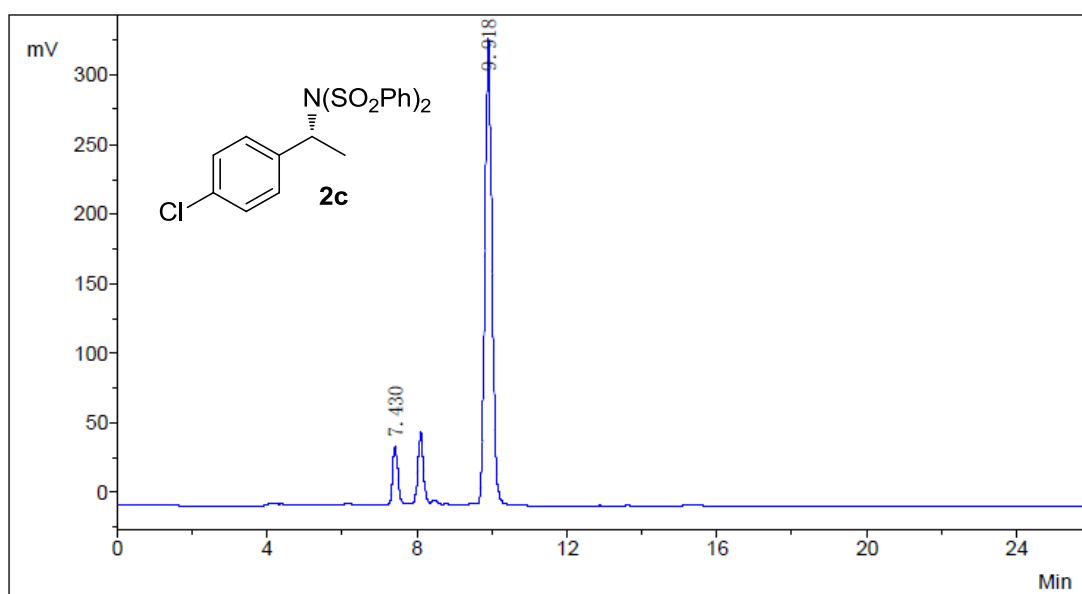

| 序号  | 峰号 | 组份名 | 保留时间  | 峰高       | 峰面积       | 面积百分比(%) |
|-----|----|-----|-------|----------|-----------|----------|
| 1   | 1  |     | 7.430 | 41128.6  | 375897.6  | 8.0045   |
| 2   | 2  |     | 9.918 | 334839.8 | 4320206.2 | 91.9955  |
| 合计: |    |     |       | 375968.3 | 4696103.8 | 100.0000 |

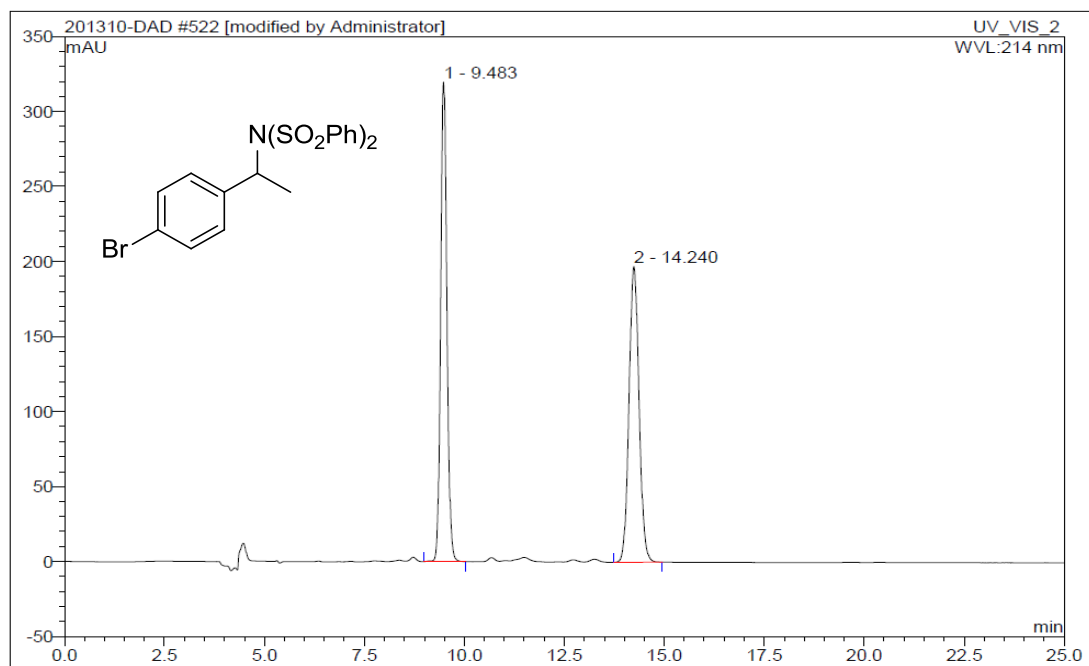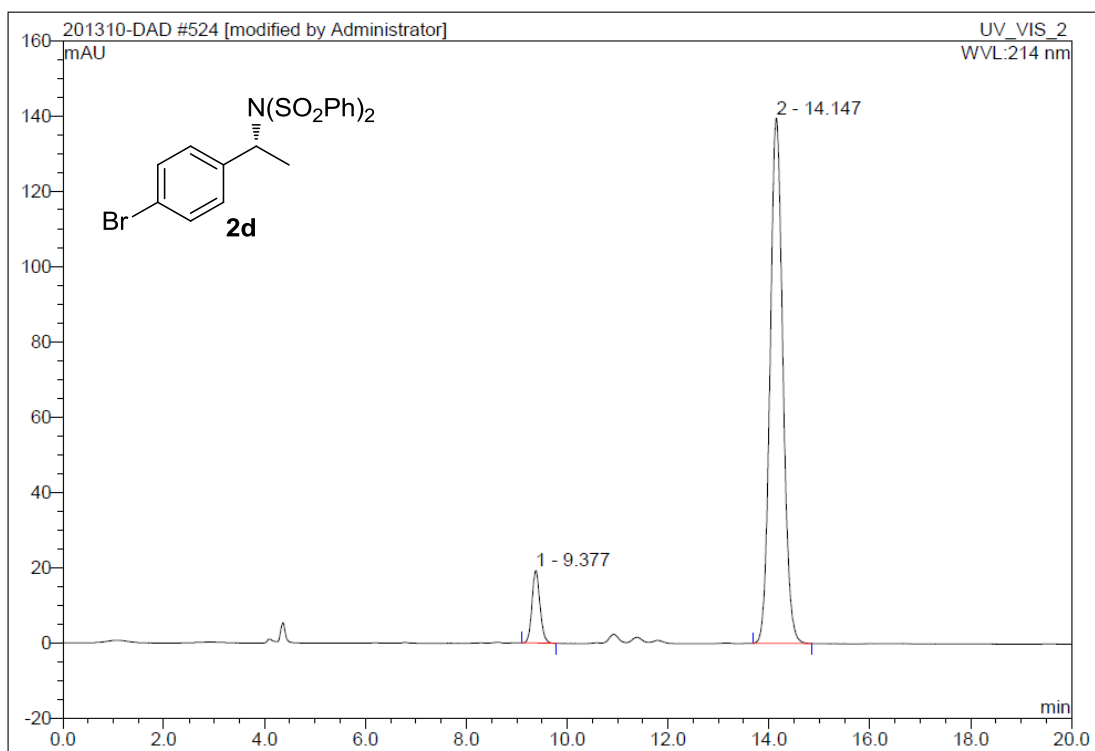

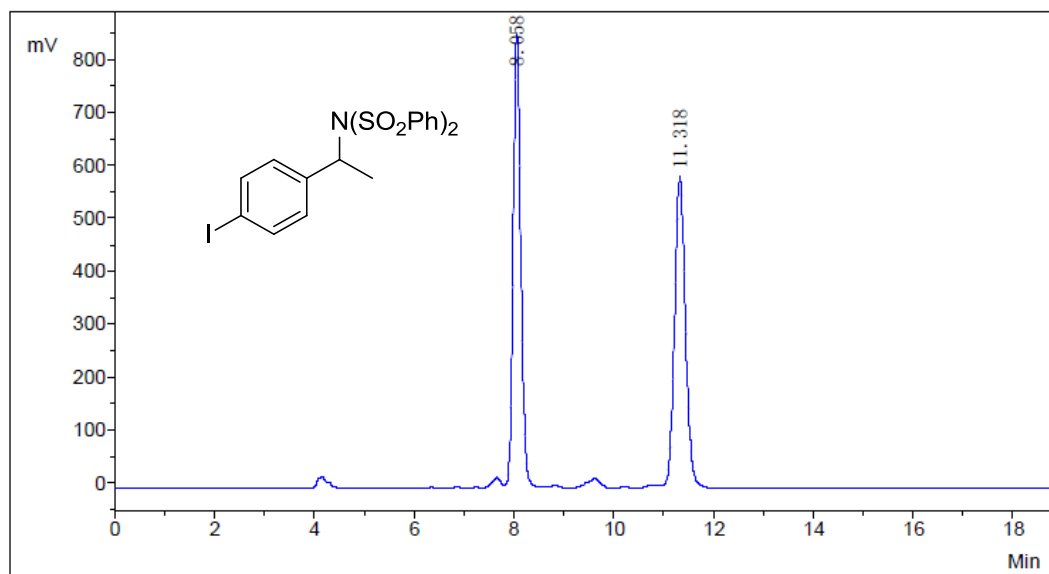

| 序号  | 峰号 | 组份名 | 保留时间   | 峰高        | 峰面积        | 面积百分比(%) |
|-----|----|-----|--------|-----------|------------|----------|
| 1   | 1  |     | 8.058  | 849964.0  | 8882609.6  | 50.1567  |
| 2   | 2  |     | 11.318 | 582939.3  | 8827121.5  | 49.8433  |
| 合计: |    |     |        | 1432903.3 | 17709731.1 | 100.0000 |

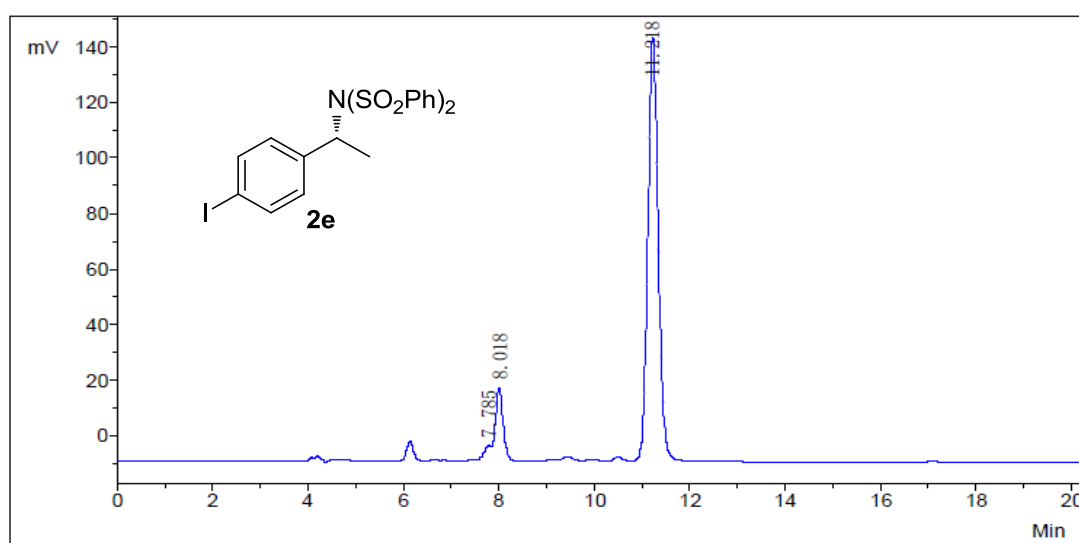

| 序号  | 峰号 | 组份名 | 保留时间   | 峰高       | 峰面积       | 面积百分比(%) |
|-----|----|-----|--------|----------|-----------|----------|
| 1   | 1  |     | 7.785  | 5282.2   | 52273.4   | 1.9877   |
| 2   | 2  |     | 8.018  | 26149.4  | 288979.6  | 10.9887  |
| 3   | 3  |     | 11.218 | 150506.3 | 2288542.7 | 87.0236  |
| 合计: |    |     |        | 181937.8 | 2629795.6 | 100.0000 |

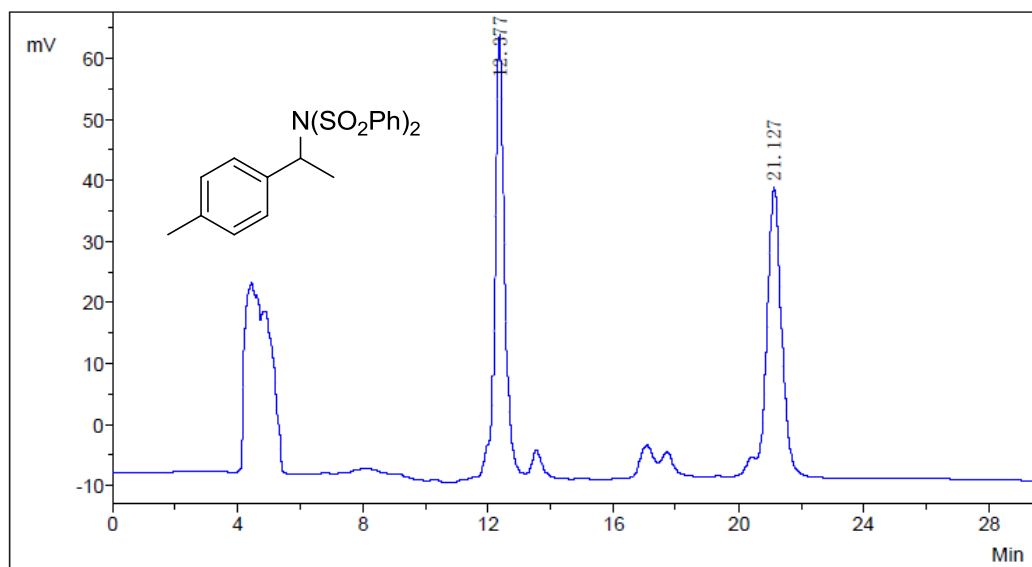

| 序号  | 峰号 | 组份名 | 保留时间   | 峰高       | 峰面积       | 面积百分比(%) |
|-----|----|-----|--------|----------|-----------|----------|
| 1   | 1  |     | 12.377 | 72522.3  | 1564777.0 | 49.6294  |
| 2   | 2  |     | 21.127 | 47358.5  | 1588146.0 | 50.3706  |
| 合计: |    |     |        | 119880.8 | 3152923.0 | 100.0000 |

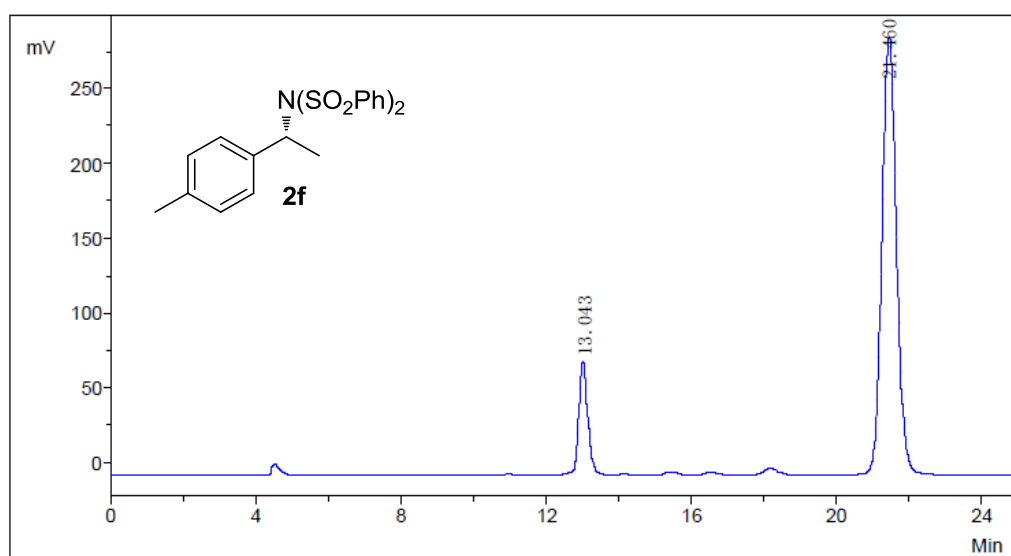

| 序号  | 峰号 | 组份名 | 保留时间   | 峰高       | 峰面积       | 面积百分比(%) |
|-----|----|-----|--------|----------|-----------|----------|
| 1   | 1  |     | 13.043 | 73784.6  | 1295520.7 | 13.8367  |
| 2   | 2  |     | 21.460 | 292124.6 | 8067422.1 | 86.1633  |
| 合计: |    |     |        | 365909.2 | 9362942.9 | 100.0000 |

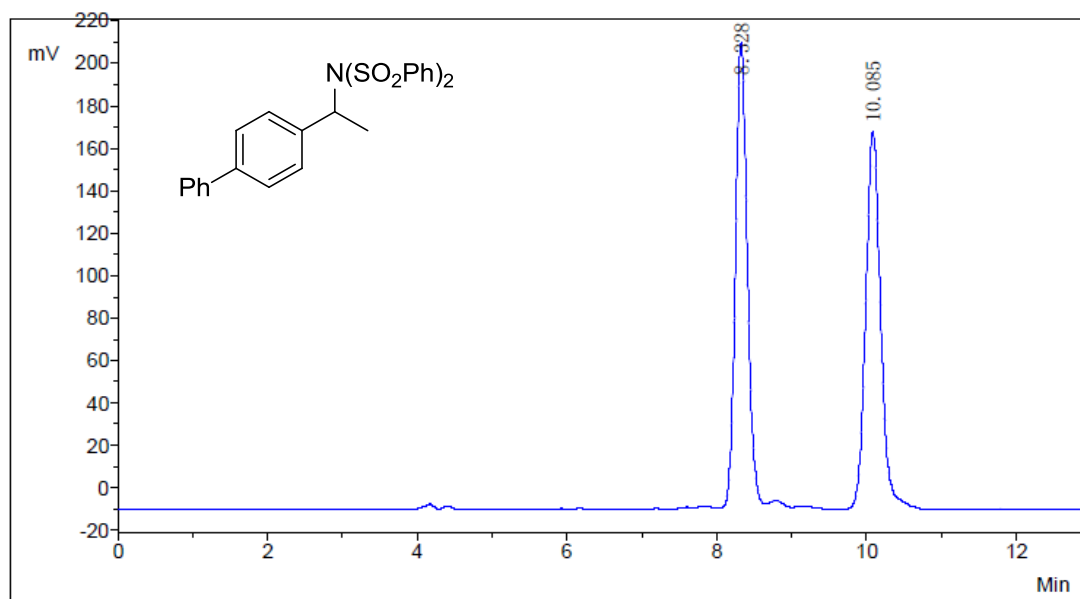

| 序号  | 峰号 | 组份名 | 保留时间   | 峰高       | 峰面积       | 面积百分比(%) |
|-----|----|-----|--------|----------|-----------|----------|
| 1   | 1  |     | 8.328  | 218484.8 | 2369452.3 | 49.2637  |
| 2   | 2  |     | 10.085 | 178040.7 | 2440279.1 | 50.7363  |
| 合计: |    |     |        | 396525.5 | 4809731.4 | 100.0000 |

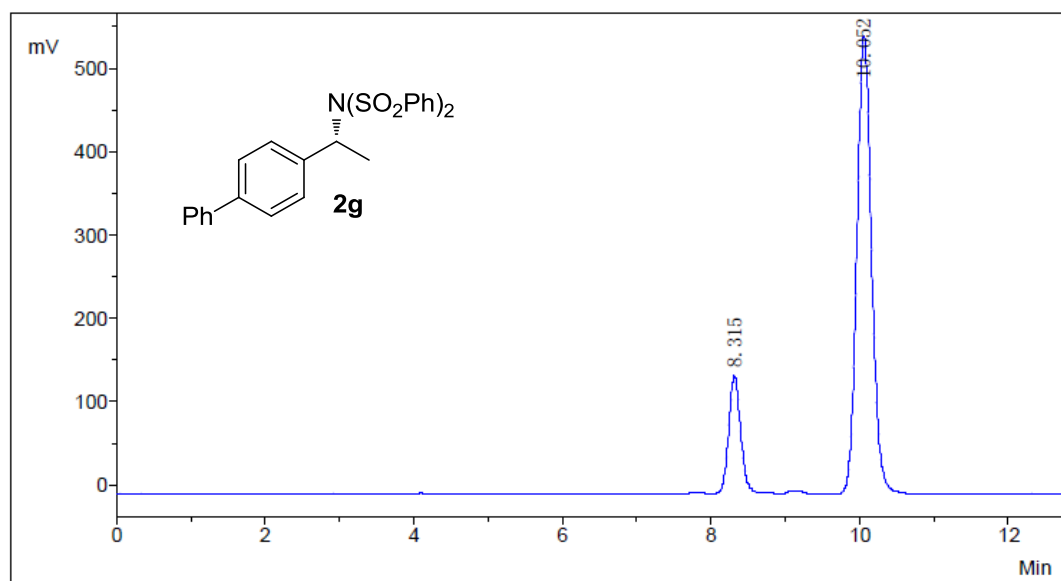

| 序号  | 峰号 | 组份名 | 保留时间   | 峰高       | 峰面积       | 面积百分比(%) |
|-----|----|-----|--------|----------|-----------|----------|
| 1   | 1  |     | 8.315  | 136477.8 | 1520759.7 | 16.7276  |
| 2   | 2  |     | 10.052 | 545972.4 | 7570554.4 | 83.2724  |
| 合计: |    |     |        | 682450.2 | 9091314.0 | 100.0000 |

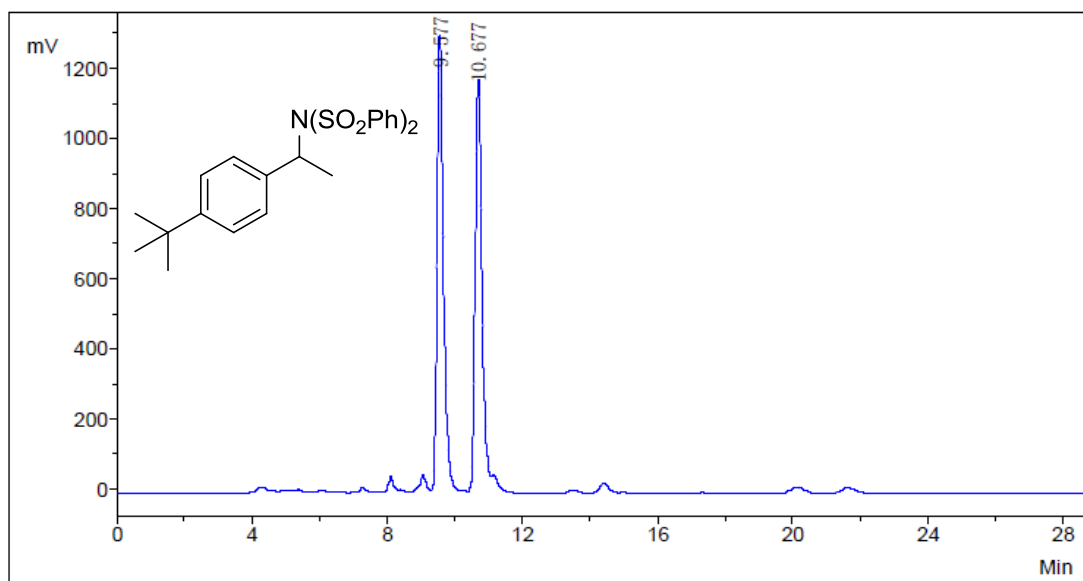

| 序号  | 峰号 | 组份名 | 保留时间   | 峰高        | 峰面积        | 面积百分比(%) |
|-----|----|-----|--------|-----------|------------|----------|
| 1   | 1  |     | 9.577  | 1249213.6 | 17374564.7 | 49.2154  |
| 2   | 2  |     | 10.677 | 1143939.2 | 17928515.7 | 50.7846  |
| 合计: |    |     |        | 2393152.8 | 35303080.4 | 100.0000 |

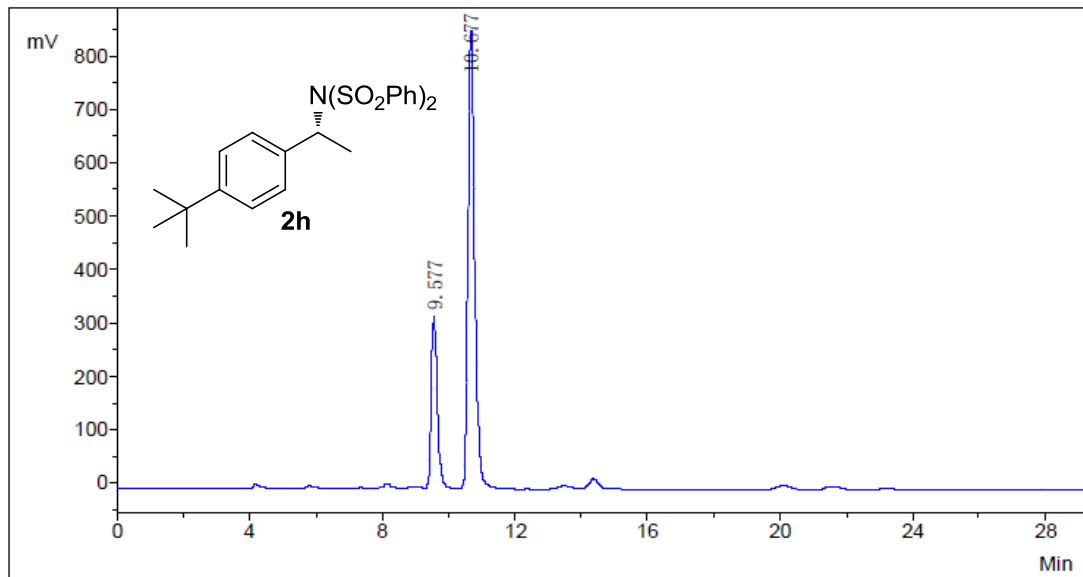

| 序号  | 峰号 | 组份名 | 保留时间   | 峰高        | 峰面积        | 面积百分比(%) |
|-----|----|-----|--------|-----------|------------|----------|
| 1   | 1  |     | 9.577  | 316911.5  | 3998401.1  | 24.3810  |
| 2   | 2  |     | 10.677 | 853237.6  | 12401285.0 | 75.6190  |
| 合计: |    |     |        | 1170149.1 | 16399686.2 | 100.0000 |

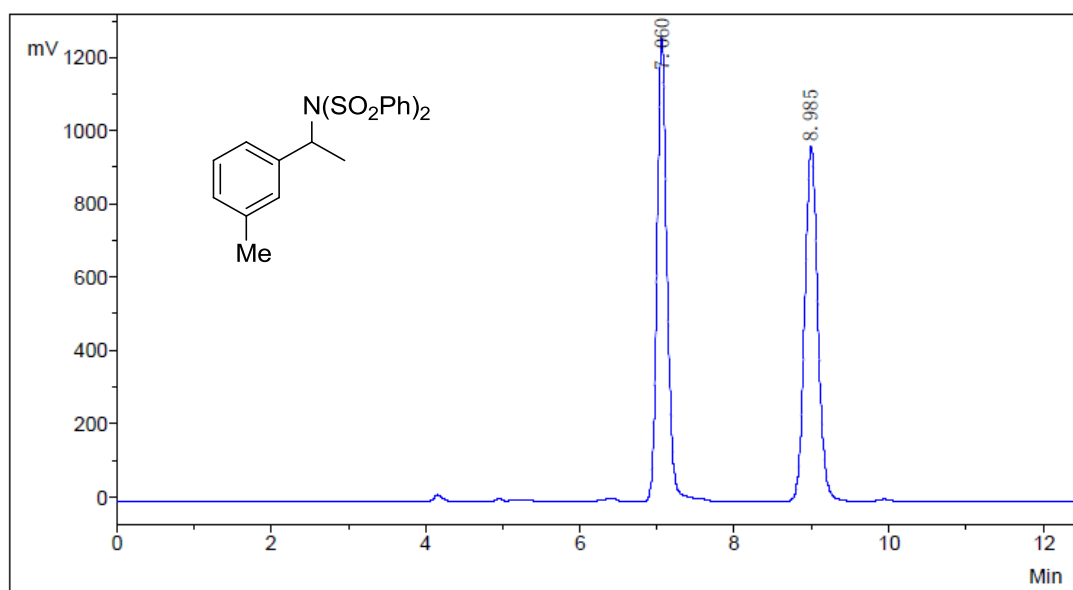

| 序号  | 峰号 | 组份名 | 保留时间  | 峰高        | 峰面积        | 面积百分比(%) |
|-----|----|-----|-------|-----------|------------|----------|
| 1   | 1  |     | 7.060 | 1260558.1 | 11413083.5 | 50.0947  |
| 2   | 2  |     | 8.985 | 958044.7  | 11369949.0 | 49.9053  |
| 合计: |    |     |       | 2218602.8 | 22783032.5 | 100.0000 |

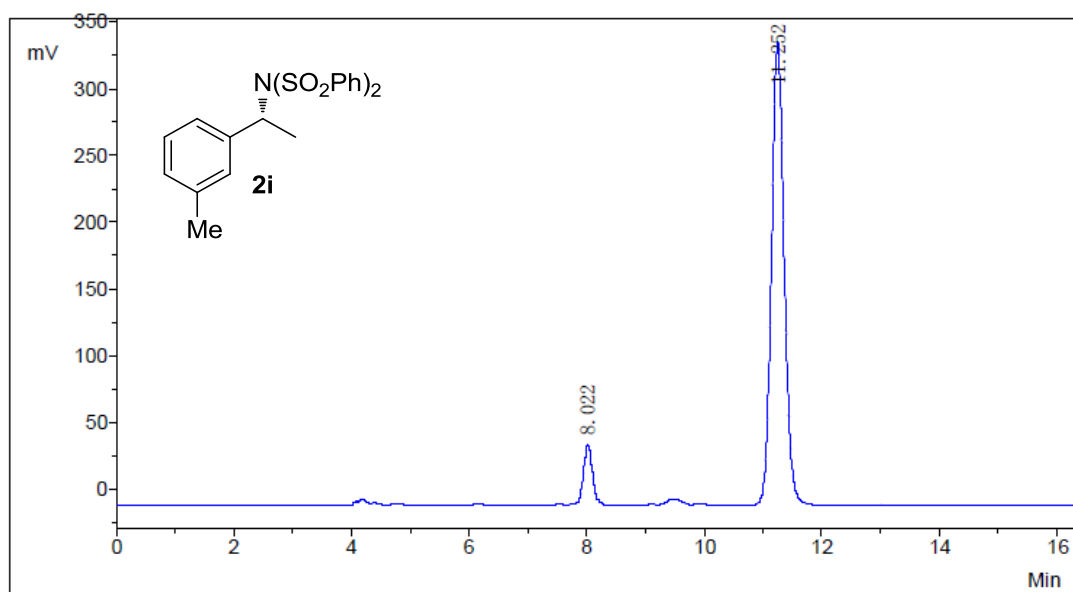

| 序号  | 峰号 | 组份名 | 保留时间   | 峰高       | 峰面积       | 面积百分比(%) |
|-----|----|-----|--------|----------|-----------|----------|
| 1   | 1  |     | 8.022  | 44943.8  | 455048.0  | 7.9783   |
| 2   | 2  |     | 11.252 | 346228.2 | 5248538.5 | 92.0217  |
| 合计: |    |     |        | 391172.0 | 5703586.5 | 100.0000 |



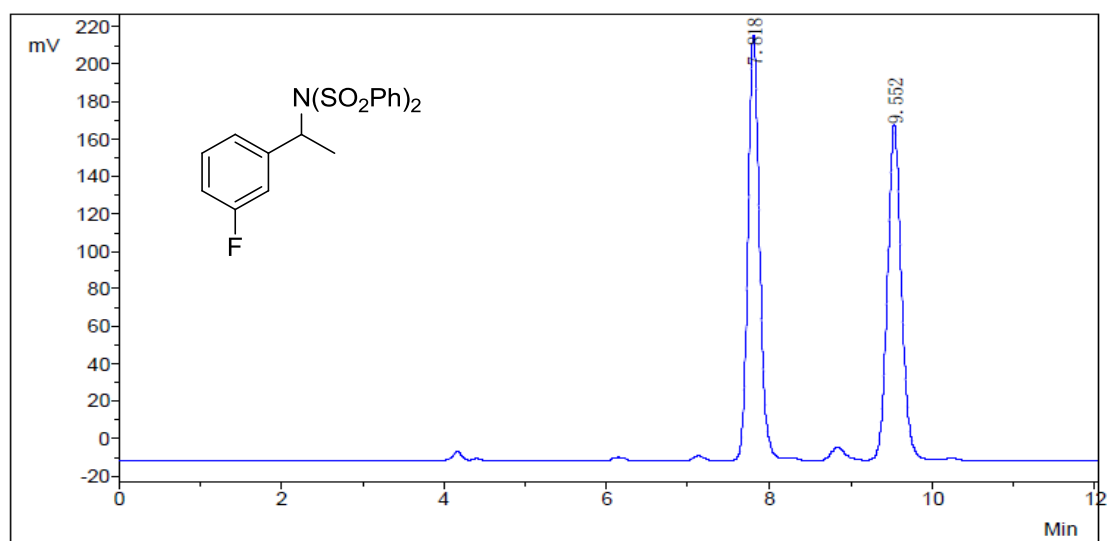

| 序号  | 峰号 | 组份名 | 保留时间  | 峰高       | 峰面积       | 面积百分比(%) |
|-----|----|-----|-------|----------|-----------|----------|
| 1   | 1  |     | 7.818 | 221728.6 | 2223199.3 | 50.7337  |
| 2   | 2  |     | 9.552 | 175184.6 | 2158894.1 | 49.2663  |
| 合计: |    |     |       | 396913.2 | 4382093.3 | 100.0000 |

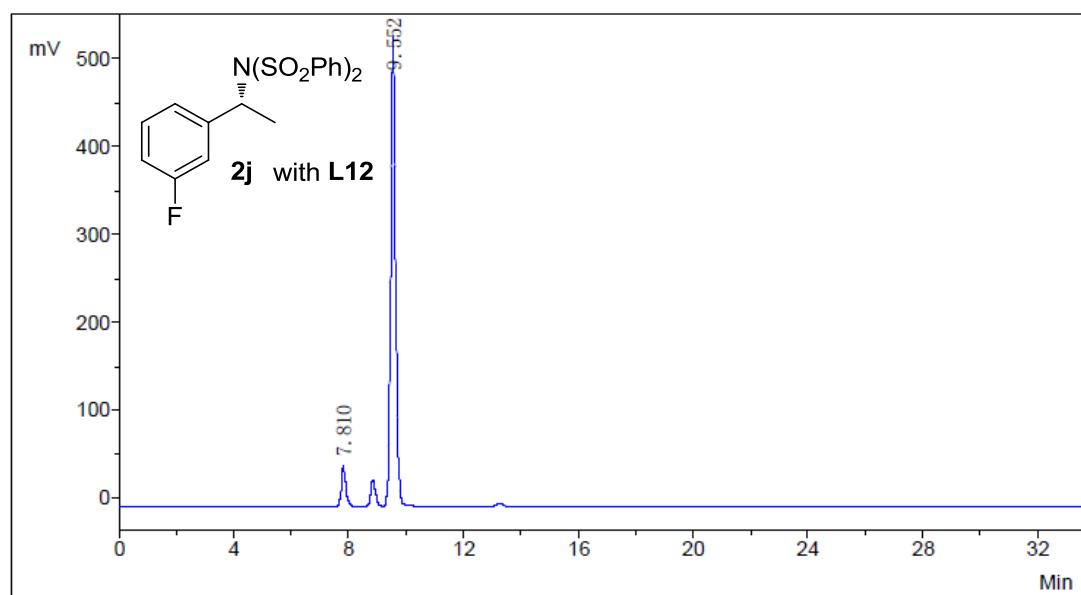

| 序号  | 峰号 | 组份名 | 保留时间  | 峰高       | 峰面积       | 面积百分比(%) |
|-----|----|-----|-------|----------|-----------|----------|
| 1   | 1  |     | 7.810 | 46473.5  | 501725.3  | 7.0742   |
| 2   | 2  |     | 9.552 | 533082.0 | 6590562.7 | 92.9258  |
| 合计: |    |     |       | 579555.5 | 7092287.9 | 100.0000 |

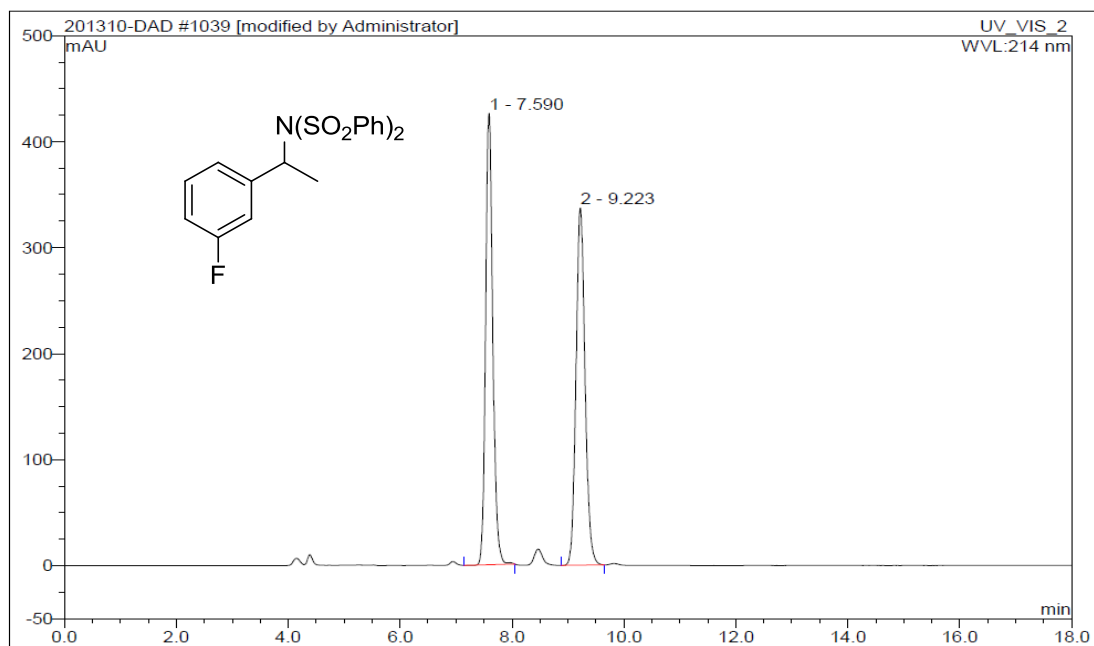

| No.    | Ret.Time<br>min | Peak Name | Height<br>mAU | Area<br>mAU*min | Rel.Area<br>% | Amount | Type |
|--------|-----------------|-----------|---------------|-----------------|---------------|--------|------|
| 1      | 7.59            | n.a.      | 425.948       | 63.452          | 50.19         | n.a.   | BMB* |
| 2      | 9.22            | n.a.      | 336.927       | 62.976          | 49.81         | n.a.   | BMB* |
| Total: |                 |           | 762.875       | 126.428         | 100.00        | 0.000  |      |

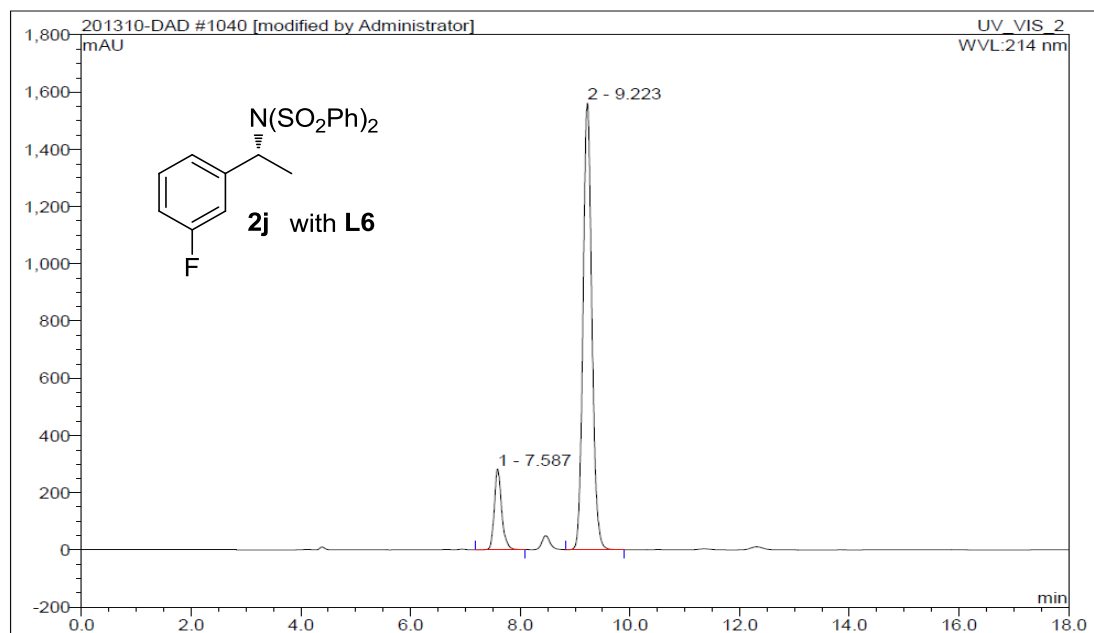

| No.    | Ret.Time<br>min | Peak Name | Height<br>mAU | Area<br>mAU*min | Rel.Area<br>% | Amount | Type |
|--------|-----------------|-----------|---------------|-----------------|---------------|--------|------|
| 1      | 7.59            | n.a.      | 282.216       | 43.802          | 13.02         | n.a.   | BMB* |
| 2      | 9.22            | n.a.      | 1561.318      | 292.532         | 86.98         | n.a.   | BMB* |
| Total: |                 |           | 1843.534      | 336.334         | 100.00        | 0.000  |      |

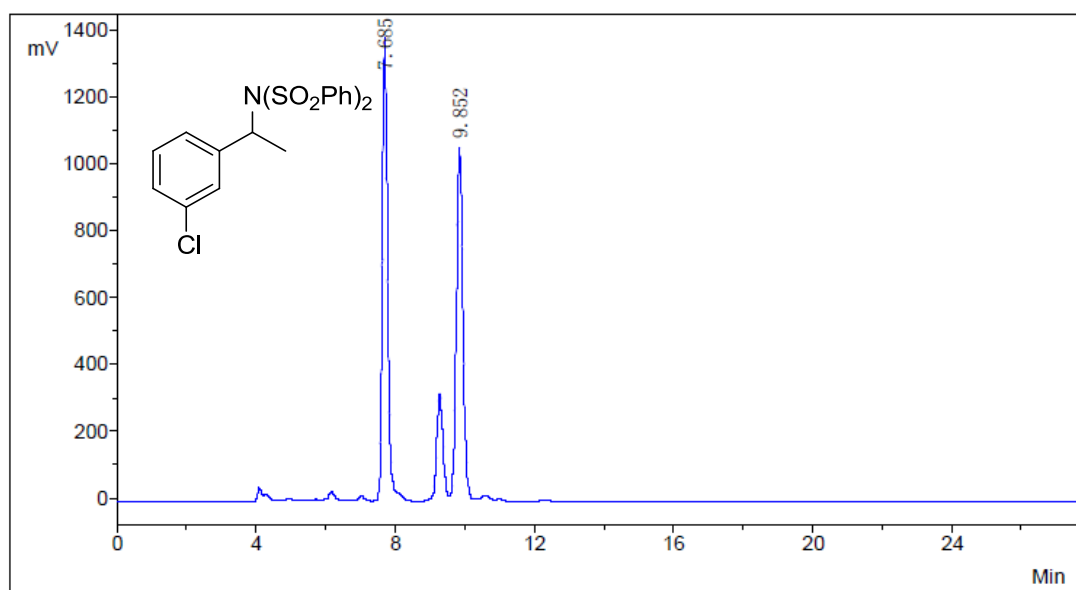

| 序号  | 峰号 | 组份名 | 保留时间  | 峰高        | 峰面积        | 面积百分比(%) |
|-----|----|-----|-------|-----------|------------|----------|
| 1   | 1  |     | 7.685 | 1347372.0 | 14490683.6 | 51.6646  |
| 2   | 2  |     | 9.852 | 1048232.1 | 13556941.1 | 48.3354  |
| 合计: |    |     |       | 2395604.1 | 28047624.7 | 100.0000 |

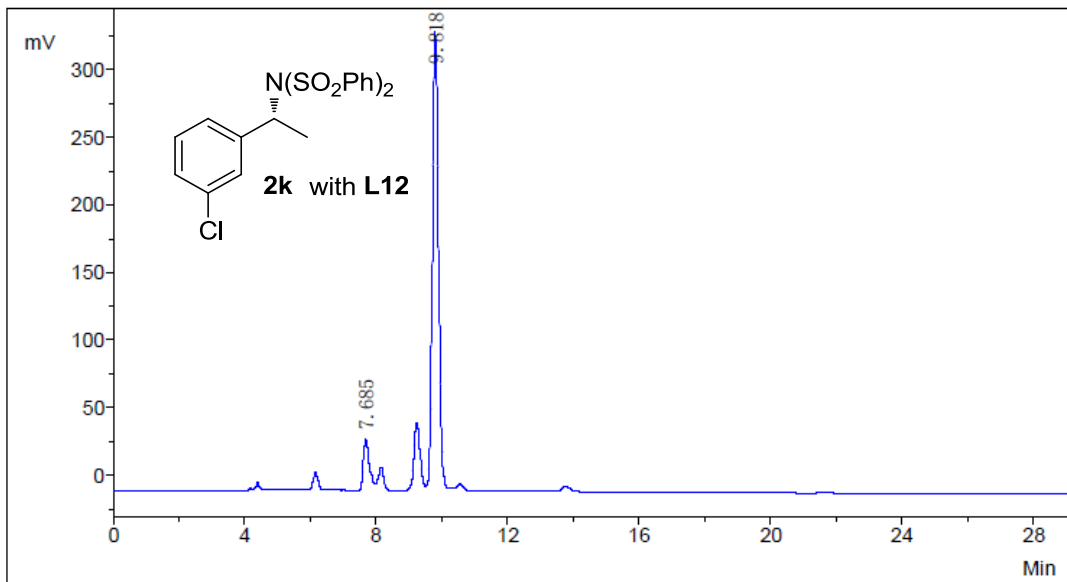

| 序号  | 峰号 | 组份名 | 保留时间  | 峰高       | 峰面积       | 面积百分比(%) |
|-----|----|-----|-------|----------|-----------|----------|
| 1   | 1  |     | 7.685 | 36263.9  | 400079.7  | 8.6279   |
| 2   | 2  |     | 9.818 | 332571.9 | 4236940.8 | 91.3721  |
| 合计: |    |     |       | 368835.7 | 4637020.5 | 100.0000 |

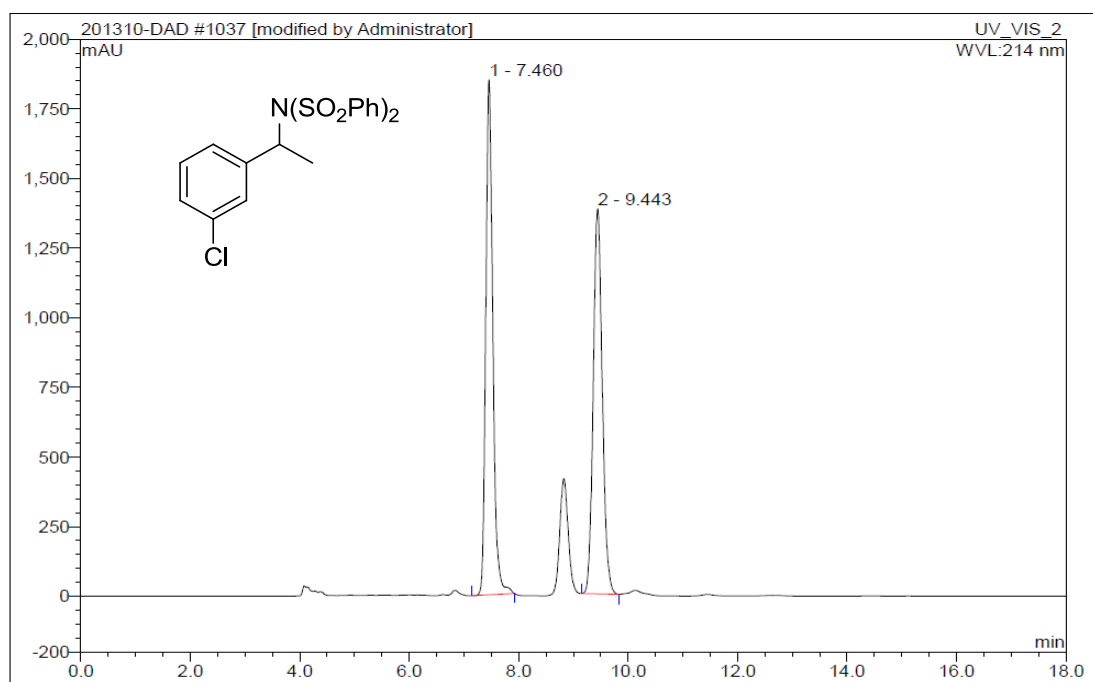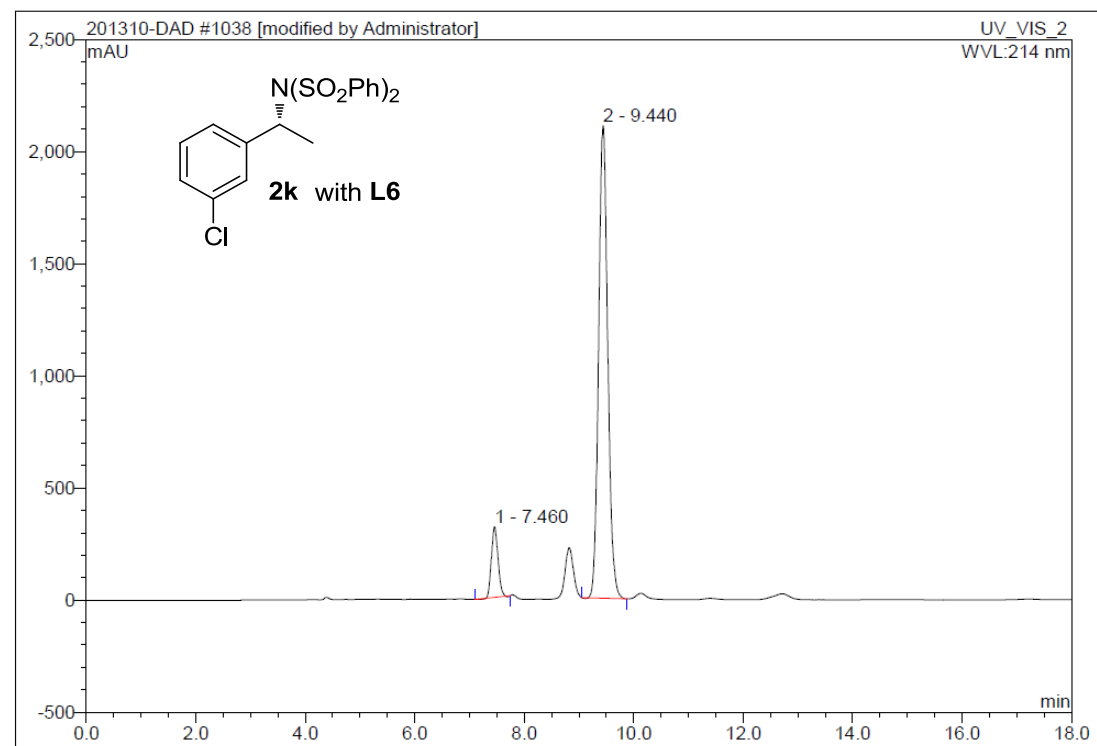

| No.    | Ret.Time min | Peak Name | Height mAU | Area mAU*min | Rel.Area % | Amount | Type |
|--------|--------------|-----------|------------|--------------|------------|--------|------|
| 1      | 7.46         | n.a.      | 315.979    | 43.543       | 9.63       | n.a.   | BMB* |
| 2      | 9.44         | n.a.      | 2107.685   | 408.589      | 90.37      | n.a.   | BMB* |
| Total: |              |           | 2423.665   | 452.132      | 100.00     | 0.000  |      |

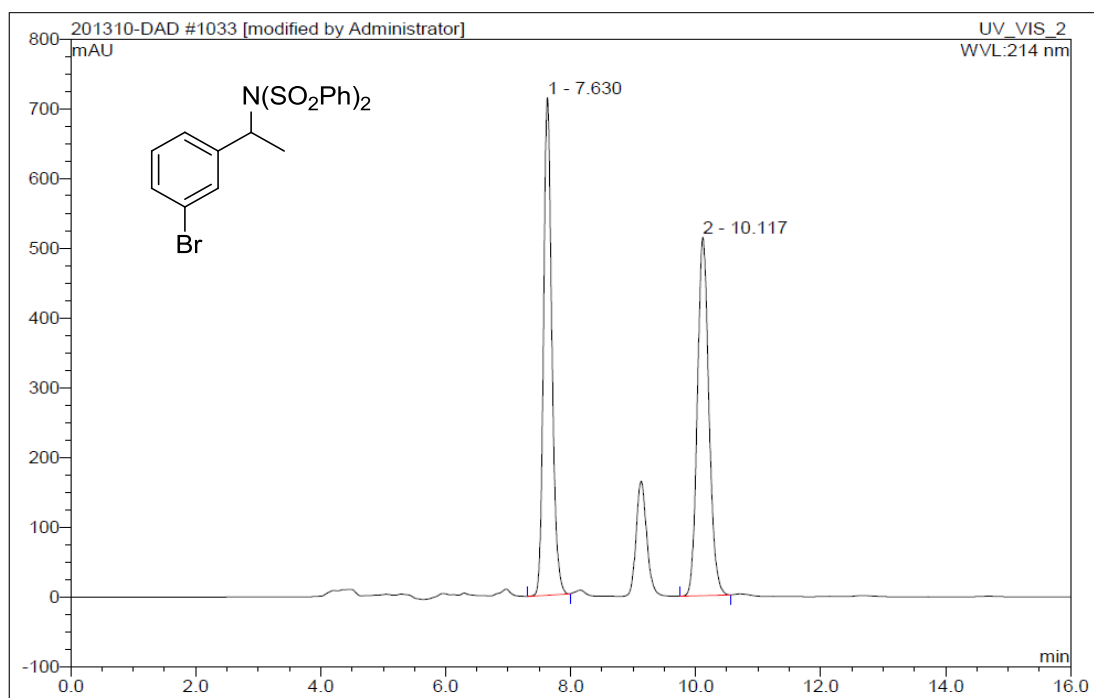

| No.    | Ret.Time<br>min | Peak Name | Height<br>mAU | Area<br>mAU*min | Rel.Area<br>% | Amount | Type |
|--------|-----------------|-----------|---------------|-----------------|---------------|--------|------|
| 1      | 7.63            | n.a.      | 713.767       | 110.417         | 50.02         | n.a.   | BMB* |
| 2      | 10.12           | n.a.      | 513.879       | 110.325         | 49.98         | n.a.   | BMB* |
| Total: |                 |           | 1227.646      | 220.743         | 100.00        | 0.000  |      |

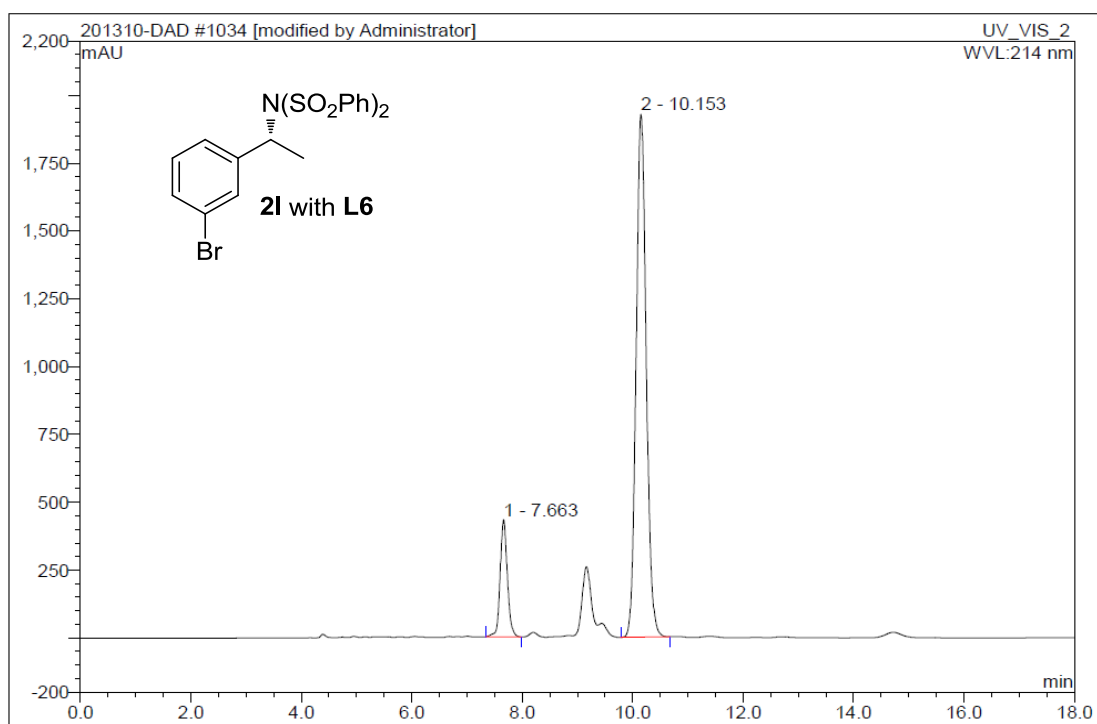

| No.    | Ret.Time<br>min | Peak Name | Height<br>mAU | Area<br>mAU*min | Rel.Area<br>% | Amount | Type |
|--------|-----------------|-----------|---------------|-----------------|---------------|--------|------|
| 1      | 7.66            | n.a.      | 432.373       | 65.879          | 13.88         | n.a.   | BMB* |
| 2      | 10.15           | n.a.      | 1927.830      | 408.918         | 86.12         | n.a.   | BMB* |
| Total: |                 |           | 2360.203      | 474.797         | 100.00        | 0.000  |      |

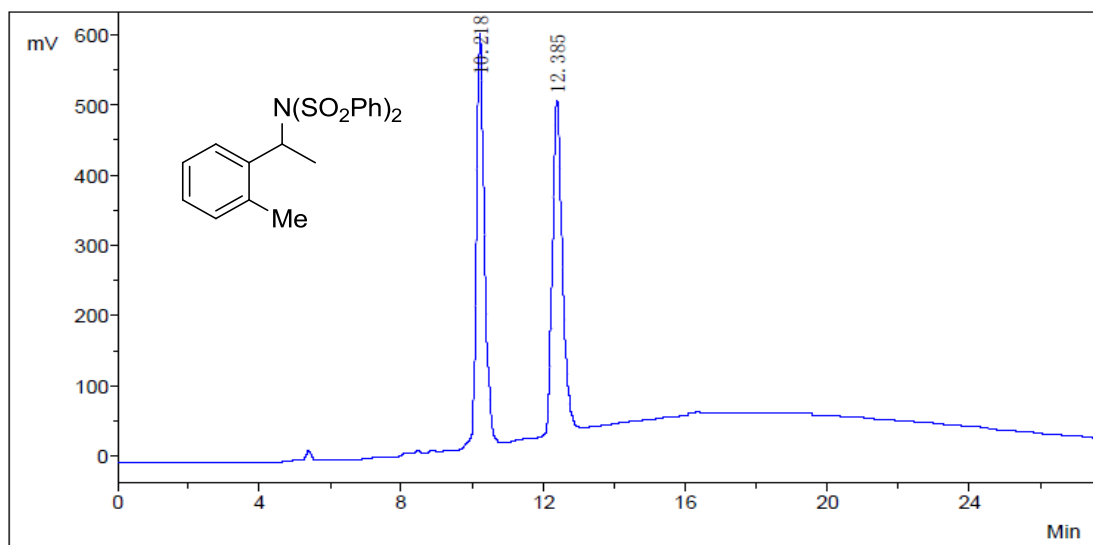

| 序号  | 峰号 | 组份名 | 保留时间   | 峰高        | 峰面积        | 面积百分比(%) |
|-----|----|-----|--------|-----------|------------|----------|
| 1   | 1  |     | 10.218 | 586610.1  | 9216559.7  | 49.9724  |
| 2   | 2  |     | 12.385 | 472255.2  | 9226731.3  | 50.0276  |
| 合计: |    |     |        | 1058865.3 | 18443291.0 | 100.0000 |

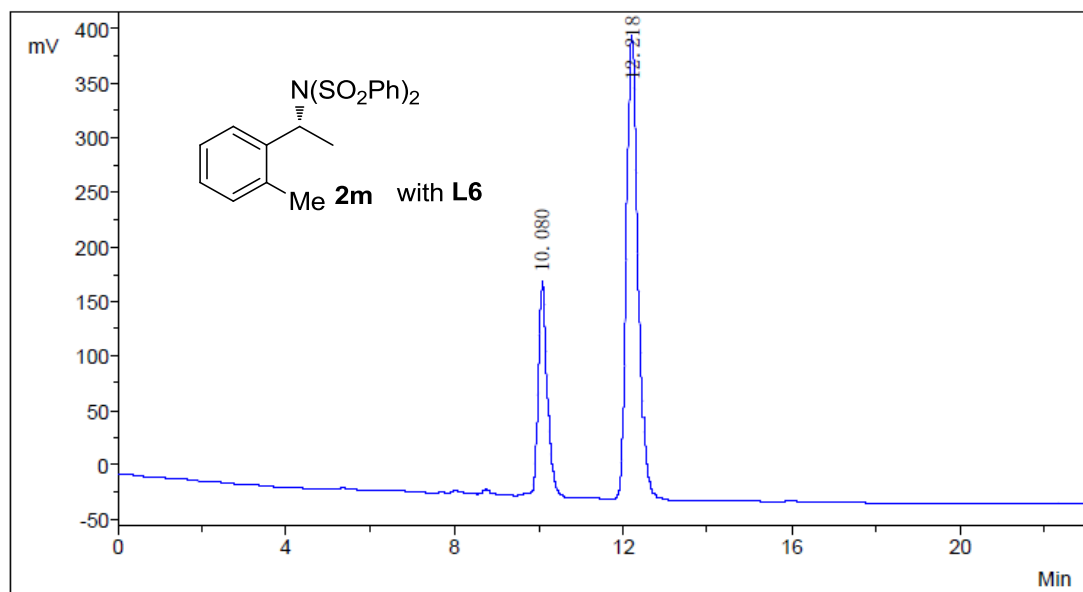

| 序号  | 峰号 | 组份名 | 保留时间   | 峰高       | 峰面积        | 面积百分比(%) |
|-----|----|-----|--------|----------|------------|----------|
| 1   | 1  |     | 10.080 | 197004.6 | 2996825.3  | 26.8654  |
| 2   | 2  |     | 12.218 | 423991.2 | 8158134.3  | 73.1346  |
| 合计: |    |     |        | 620995.8 | 11154959.6 | 100.0000 |

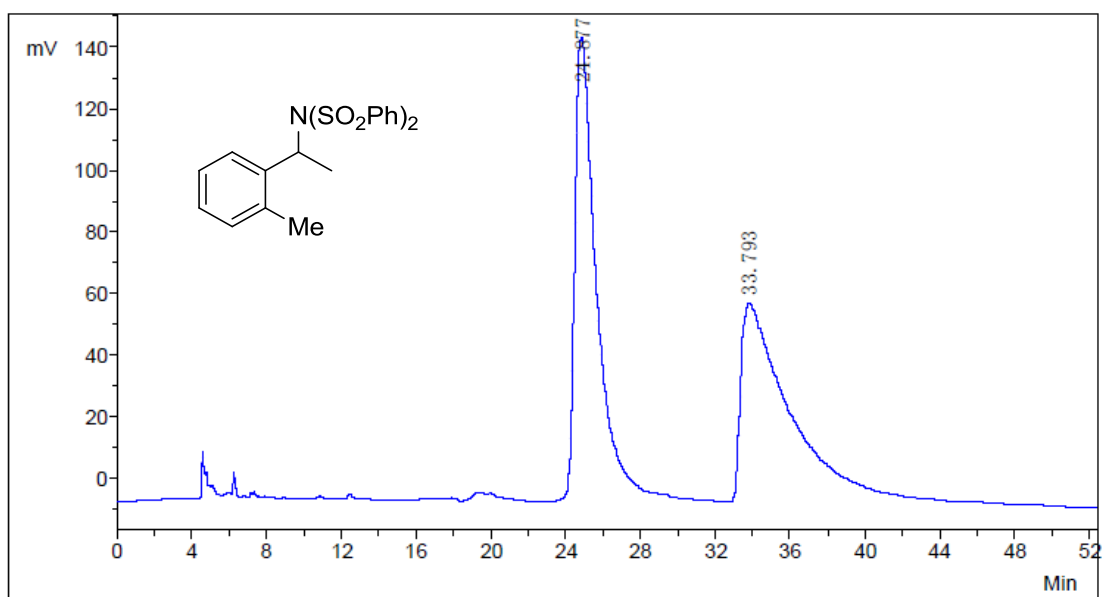

| 序号  | 峰号 | 组份名 | 保留时间   | 峰高       | 峰面积        | 面积百分比(%) |
|-----|----|-----|--------|----------|------------|----------|
| 1   | 1  |     | 24.877 | 150376.1 | 12326445.8 | 50.0069  |
| 2   | 2  |     | 33.793 | 64291.8  | 12323042.2 | 49.9931  |
| 合计: |    |     |        | 214668.0 | 24649488.0 | 100.0000 |

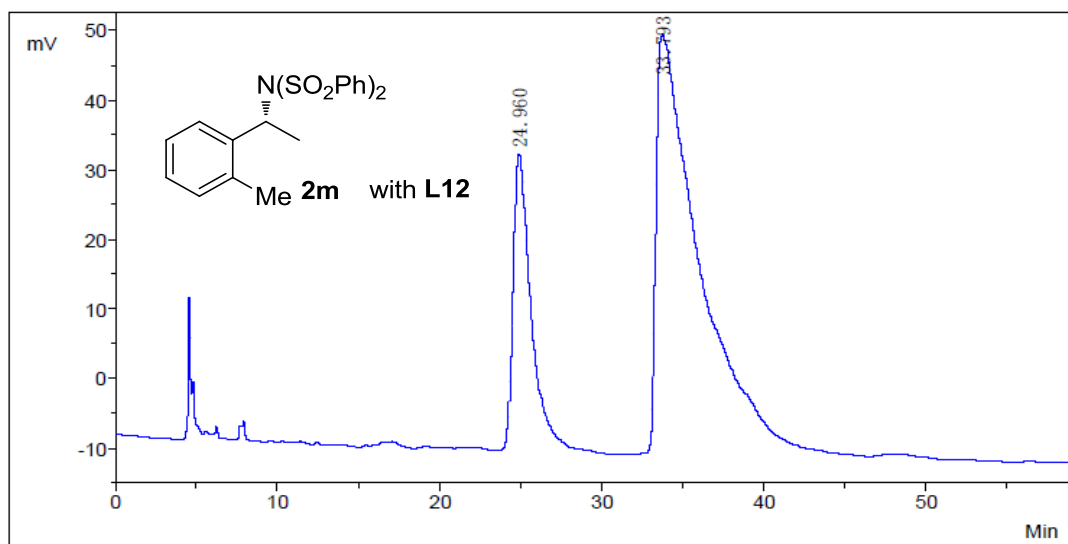

| 序号  | 峰号 | 组份名 | 保留时间   | 峰高       | 峰面积        | 面积百分比(%) |
|-----|----|-----|--------|----------|------------|----------|
| 1   | 1  |     | 24.960 | 42637.1  | 3383178.6  | 22.4199  |
| 2   | 2  |     | 33.793 | 60596.5  | 11706889.4 | 77.5801  |
| 合计: |    |     |        | 103233.6 | 15090068.1 | 100.0000 |

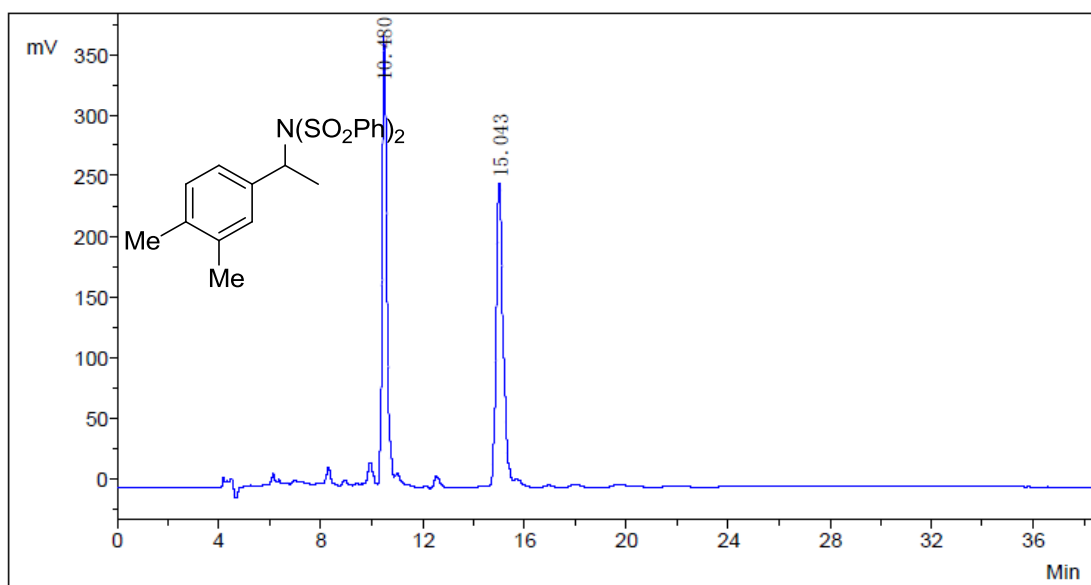

| 序号  | 峰号 | 组份名 | 保留时间   | 峰高       | 峰面积       | 面积百分比(%) |
|-----|----|-----|--------|----------|-----------|----------|
| 1   | 1  |     | 10.480 | 354210.7 | 4445085.6 | 48.0697  |
| 2   | 2  |     | 15.043 | 248163.4 | 4802084.6 | 51.9303  |
| 合计: |    |     |        | 602374.1 | 9247170.2 | 100.0000 |

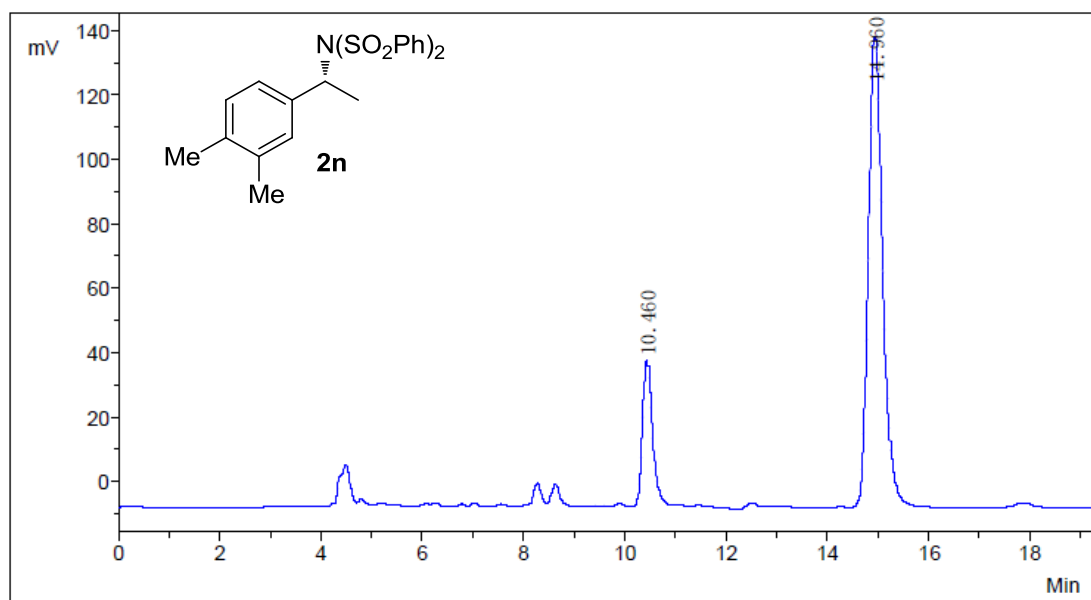

| 序号  | 峰号 | 组份名 | 保留时间   | 峰高       | 峰面积       | 面积百分比(%) |
|-----|----|-----|--------|----------|-----------|----------|
| 1   | 1  |     | 10.460 | 44688.2  | 683248.7  | 19.1841  |
| 2   | 2  |     | 14.960 | 144825.3 | 2878281.4 | 80.8159  |
| 合计: |    |     |        | 189513.5 | 3561530.1 | 100.0000 |
